# Supplementary material for: Comparative analysis of ChAdOx1 nCoV-19 and Ad26.COV2.S SARS-CoV-2 vector vaccines
Source: Research Square preprint supplement (doi:10.21203/rs.3.rs-736157/v1), 2021-07-26
Supplement: Supplementary file 3 [file 150602140efd648b0b58a11a.xlsx]

## Sheet: iBAQ intensity table
				iBAQ intensities						peptide count
				ChAdOx1 nCoV-19			Ad26.COV2.S			ChAdOx1 nCoV-19			Ad26.COV2.S
protein names	protein ID	theoretical mass (Da)	membership (human or vector)	LOT 1	LOT 2	LOT 3	LOT 1	LOT 2	LOT 3	LOT 1	LOT 2	LOT 3	LOT 1	LOT 2	LOT 3	Description
HS90B_HUMAN	P08238	83264.2	human	1.85532e+07	1.0786e+07	8.2015e+06				55	53	53				Heat shock protein HSP 90-beta
1433E_HUMAN	P62258	29173.9	human	9103247	6.36006e+06	3.9847e+06	3189.6	1410.5	10892.5	24	24	23	7	4	7	14-3-3 protein epsilon
HS90A_HUMAN	P07900	84659.7	human	8.99993e+06	4.32795e+06	3.51598e+06	343.2		1264.1	42	41	41	4		4	Heat shock protein HSP 90-alpha
TERA_HUMAN	P55072	89321.8	human	7.05555e+06	3279384	2.97865e+06				61	62	58				Transitional endoplasmic reticulum ATPase
VIME_HUMAN	P08670	53651.7	human	7.04873e+06	5.76953e+06	4.71502e+06				57	57	55				Vimentin
RLA2_HUMAN	P05387	11664.9	human	5.80996e+06	2.60371e+06	1.21872e+06				9	9	9				60S acidic ribosomal protein P2
TBA1B_HUMAN	P68363	50151.6	human	5.78873e+06	3.31841e+06	4.09209e+06	751.1	1748.7		23	22	23	4	7		Tubulin alpha-1B chain
ENPL_HUMAN	P14625	92468.9	human	4.76114e+06	2.15213e+06	1.64433e+06				62	61	58				Endoplasmin
TBB4B_HUMAN	P68371	49831	human	4.27343e+06	1.99294e+06	2.09225e+06				23	23	22				Tubulin beta-4B chain
CALR_HUMAN	P27797	48141.6	human	3.52426e+06	1.60963e+06	742441				18	18	18				Calreticulin
1433Z_HUMAN	P63104	27745.1	human	3.38596e+06	3.01892e+06	2287299			6482.2	19	18	17			3	14-3-3 protein zeta/delta
SSBP_HUMAN	Q04837	17259.7	human	3.12275e+06	1.99832e+06	795442				10	10	9				Single-stranded DNA-binding protein, mitochondrial
1433B_HUMAN	P31946	28082.4	human	3.03431e+06	2.12549e+06	1.57873e+06				18	18	18				14-3-3 protein beta/alpha
NPM_HUMAN	P06748	32575	human	3.02053e+06	709144	30492.5				12	11	7				Nucleophosmin
LG3BP_HUMAN	Q08380	65331	human	2.27344e+06	2.19196e+06	1807858	329		9222.1	20	20	20	3		5	Galectin-3-binding protein
1433G_HUMAN	P61981	28302.6	human	2.07024e+06	961808	563446				13	12	10				14-3-3 protein gamma
G3P_HUMAN	P04406	36053.2	human	2.04073e+06	1.17154e+06	892738	3558.4	7179.3	2407	16	16	16	3	5	3	Glyceraldehyde-3-phosphate dehydrogenase
RLA0_HUMAN	P05388	34273.5	human	1.97126e+06	896814	500814				19	19	19				60S acidic ribosomal protein P0
GLU2B_HUMAN	P14314	59425.4	human	1.9666e+06	924831	487356				20	20	20				Glucosidase 2 subunit beta
NASP_HUMAN	P49321	85237.7	human	1.86403e+06	860310	718026	183.6		4864.7	47	46	46	3		8	Nuclear autoantigenic sperm protein
HNRPC_HUMAN	P07910	33670	human	1.442e+06	409741	90938				18	17	14				Heterogeneous nuclear ribonucleoproteins C1/C2
TPM4_HUMAN	P67936	28521.8	human	1.4316e+06	1.3334e+06	1.72725e+06				28	27	28				Tropomyosin alpha-4 chain
TBB5_HUMAN	P07437	49670.8	human	1371851	751014	632165				4	4	4				Tubulin beta chain
TBB2B_HUMAN	Q9BVA1	49953.1	human	1.24316e+06	649255	555306				6	5	5				Tubulin beta-2B chain
1433F_HUMAN	Q04917	28218.7	human	1.0917e+06	684450	455630				17	17	17				14-3-3 protein eta
H4_HUMAN	P62805	11367.3	human	1.06201e+06	1.65828e+06	580414	858350	68930.8	676072	8	8	6	8	6	7	Histone H4
IF4A1_HUMAN	P60842	46153.9	human	963537	601873	513438				27	27	27				Eukaryotic initiation factor 4A-I
RLA1_HUMAN	P05386	11513.9	human	957353	398081	370774				3	3	3				60S acidic ribosomal protein P1
EIF3L_HUMAN	Q9Y262	66727	human	863782	385293	82253.7				25	24	21				Eukaryotic translation initiation factor 3 subunit L
H33_HUMAN	P84243	15327.9	human	857710	1.40614e+06	382681				4	3	3				Histone H3.3
EF1G_HUMAN	P26641	50118.8	human	799335	447762	294766				15	15	15				Elongation factor 1-gamma
EF1D_HUMAN	P29692	31121.8	human	668938	271737	123768				13	13	10				Elongation factor 1-delta
RS14_HUMAN	P62263	16272.7	human	658672	480720	252145	49376	6645.8	49895.4	8	8	8	5	5	5	40S ribosomal protein S14
PDIA4_HUMAN	P13667	72932.5	human	652630	251398	119212				43	41	38				Protein disulfide-isomerase A4
EIF3E_HUMAN	P60228	52220.8	human	630151	281458	54977.8				21	20	19				Eukaryotic translation initiation factor 3 subunit E
PDIA1_HUMAN	P07237	57116.4	human	629456	600512	668382			2654.1	34	35	34			6	Protein disulfide-isomerase
EIF3I_HUMAN	Q13347	36501.8	human	629017	322135	92902.5				16	14	13				Eukaryotic translation initiation factor 3 subunit I
RL22_HUMAN	P35268	14787	human	621567	347671	160785				6	6	4				60S ribosomal protein L22
RS3_HUMAN	P23396	26688.3	human	610158	401854	290427				16	16	15				40S ribosomal protein S3
EIF3A_HUMAN	Q14152	166569	human	590578	274253	45701.7				67	67	55				Eukaryotic translation initiation factor 3 subunit A
RUVB2_HUMAN	Q9Y230	51156.6	human	570176	530082	837714				28	28	29				RuvB-like 2
C1QBP_HUMAN	Q07021	31362.2	human	562264	446436	171267				12	11	10				Complement component 1 Q subcomponent-binding protein, mitochondrial
NUCL_HUMAN	P19338	76614.4	human	543925	31601.1	5105.7				36	23	3				Nucleolin
EIF3C_HUMAN	Q99613	105344	human	522328	248866	35399.1				35	34	23				Eukaryotic translation initiation factor 3 subunit C
KPYM_HUMAN	P14618	57936.9	human	518878	306209	304365	528.4	735.4	882.6	31	31	31	3	4	3	Pyruvate kinase PKM
PTMA_HUMAN	P06454	12203	human	506622	117016					3	3					Prothymosin alpha
RSSA_HUMAN	P08865	32854.1	human	490057	285928	211941				10	10	10				40S ribosomal protein SA
ACPH_HUMAN	P13798	81224.6	human	465356	362023	280288				25	25	25				Acylamino-acid-releasing enzyme
MEP50_HUMAN	Q9BQA1	36724.4	human	457489	208903	137393				6	6	6				Methylosome protein 50
1433T_HUMAN	P27348	27764.2	human	451195	354149	500719				13	13	13				14-3-3 protein theta
RACK1_HUMAN	P63244	35076.7	human	448228	308296	213500				10	9	10				Receptor of activated protein C kinase 1
EIF3B_HUMAN	P55884	92481.6	human	441583	217945	58216.3				39	39	33				Eukaryotic translation initiation factor 3 subunit B
RAN_HUMAN	P62826	24423.1	human	430724	272453	190451				5	4	5				GTP-binding nuclear protein Ran
RS20_HUMAN	P60866	13372.7	human	427683	252202	154471				3	3	3				40S ribosomal protein S20
RUVB1_HUMAN	Q9Y265	50228	human	414690	374124	498754				22	22	22				RuvB-like 1
RBBP7_HUMAN	Q16576	47820.1	human	410175	252648	196242				10	10	10				Histone-binding protein RBBP7
EIF3D_HUMAN	O15371	63972.8	human	409804	184284	27416				21	18	17				Eukaryotic translation initiation factor 3 subunit D
RS15A_HUMAN	P62244	14839.5	human	401539	223338	171274	8710.4		13726.5	7	7	7	4		4	40S ribosomal protein S15a
ANM5_HUMAN	O14744	72683.9	human	390889	190738	124054				24	23	23				Protein arginine N-methyltransferase 5
EIF3H_HUMAN	O15372	39930.3	human	387324	181501	32842.7				17	15	13				Eukaryotic translation initiation factor 3 subunit H
EIF3J_HUMAN	O75822	29062.4	human	378915	133682	32083.6				18	18	11				Eukaryotic translation initiation factor 3 subunit J
EIF3K_HUMAN	Q9UBQ5	25059.7	human	378202	158752	38543.2				10	9	6				Eukaryotic translation initiation factor 3 subunit K
RL38_HUMAN	P63173	8217.88	human	374464	220923	218643				5	5	5				60S ribosomal protein L38
RS8_HUMAN	P62241	24205.2	human	364449	377921	334208	150833	39781.2	220986	10	10	9	8	7	8	40S ribosomal protein S8
EIF3F_HUMAN	O00303	37563.8	human	358033	156772	36154.9				10	10	10				Eukaryotic translation initiation factor 3 subunit F
NONO_HUMAN	Q15233	54231.5	human	353938	187879	111248	8410.3		6196.9	21	21	21	4		4	Non-POU domain-containing octamer-binding protein
ICLN_HUMAN	P54105	26215.3	human	350189	189678	66892				6	6	6				Methylosome subunit pICln
EF2_HUMAN	P13639	95338.1	human	347110	210712	177242				33	32	32				Elongation factor 2
RANG_HUMAN	P43487	23310.1	human	340529	179994	129028				7	7	7				Ran-specific GTPase-activating protein
CDK1_HUMAN	P06493	34095.4	human	336926	229405	186506	2113.3		1465.7	17	17	17	3		3	Cyclin-dependent kinase 1
CALX_HUMAN	P27824	67568.3	human	326944	279655	217957				25	25	24				Calnexin
U5S1_HUMAN	Q15029	109436	human	317517	159167	66226.3				39	39	36				116 kDa U5 small nuclear ribonucleoprotein component
GANAB_HUMAN	Q14697	106874	human	314819	62908.7	69647				34	25	29				Neutral alpha-glucosidase AB
RS18_HUMAN	P62269	17718.7	human	309888	199061	87105.9	30167.8	4965.6	32270.4	8	8	8	5	5	5	40S ribosomal protein S18
HNRPK_HUMAN	P61978	50976.2	human	306930	147366	65138.7	2750	981.3	6427.2	22	21	20	4	4	4	Heterogeneous nuclear ribonucleoprotein K
PPM1G_HUMAN	O15355	59271.6	human	306169	152495	57237.1				14	14	12				Protein phosphatase 1G
SF3B3_HUMAN	Q15393	135577	human	301790	145097	132219				35	32	33				Splicing factor 3B subunit 3
EF1B_HUMAN	P24534	24763.7	human	292481	126979	110692				7	7	6				Elongation factor 1-beta
BIP_HUMAN	P11021	72333	human	286130	142413	183822				33	33	32				Endoplasmic reticulum chaperone BiP
TCPQ_HUMAN	P50990	59620.6	human	278407	243907	473287				29	29	29				T-complex protein 1 subunit theta
RL11_HUMAN	P62913	20252.4	human	272127	173908	149241				5	5	5				60S ribosomal protein L11
RS25_HUMAN	P62851	13742.1	human	270154	153742	66475.7	26286.9	3992.7	38211.8	4	4	4	3	3	3	40S ribosomal protein S25
HSP7C_HUMAN	P11142	70898.1	human	260497	158084	164492		326	367.6	26	26	26		4	3	Heat shock cognate 71 kDa protein
HNRH1_HUMAN	P31943	49229.5	human	260083	149972	99489	6982.9	727.1	5918.4	11	11	10	6	4	6	Heterogeneous nuclear ribonucleoprotein H
EIF3G_HUMAN	O75821	35611	human	257899	126852	35554.2				16	16	13				Eukaryotic translation initiation factor 3 subunit G
PA2G4_HUMAN	Q9UQ80	43786.9	human	255222	155774	120609				15	15	15				Proliferation-associated protein 2G4
NID1_HUMAN	P14543	136377	human	253991	144810	120813				34	33	33				Nidogen-1
KCRU_HUMAN	P12532	47036.8	human	253604	152829	70559.4				13	12	12				Creatine kinase U-type, mitochondrial
PRDX1_HUMAN	Q06830	22110.3	human	251639	209545	124429				14	14	14				Peroxiredoxin-1
RS16_HUMAN	P62249	16445.3	human	248802	180940	110817	7809.5	2763	7785.9	9	9	9	4	4	4	40S ribosomal protein S16
XRCC6_HUMAN	P12956	69843.1	human	248615	141738	187516				30	30	30				X-ray repair cross-complementing protein 6
CSK21_HUMAN	P68400	45143.6	human	236550	78659.8	42116.7				13	11	10				Casein kinase II subunit alpha
TCPB_HUMAN	P78371	57488.2	human	233931	216584	411207				27	28	29				T-complex protein 1 subunit beta
PSA4_HUMAN	P25789	29483.8	human	232435	220617	1.99202e+06	1635.1		47856.3	9	11	12	4		6	Proteasome subunit alpha type-4
RS3A_HUMAN	P61247	29944.9	human	226455	143554	92615				14	14	14				40S ribosomal protein S3a
YBOX1_HUMAN	P67809	35924.2	human	218069	330592	21990.1				14	14	12				Y-box-binding protein 1
SERA_HUMAN	O43175	56650.5	human	214778	140847	86509.6				14	14	14				D-3-phosphoglycerate dehydrogenase
ANM1_HUMAN	Q99873	42461.6	human	214433	152526	131944				12	12	12				Protein arginine N-methyltransferase 1
FKBP4_HUMAN	Q02790	51804.6	human	213823	130335	146562				26	26	26				Peptidyl-prolyl cis-trans isomerase FKBP4
MAP1B_HUMAN	P46821	270634	human	207616	54306.9	122423				75	65	72				Microtubule-associated protein 1B
IF4A3_HUMAN	P38919	46871	human	205338	126850	116057				18	18	17				Eukaryotic initiation factor 4A-III
OAT_HUMAN	P04181	48534.8	human	204018	134422	73971.9				20	20	18				Ornithine aminotransferase, mitochondrial
CLUS_HUMAN	P10909	52494.6	human	203168	133022	236639				12	12	12				Clusterin
C1TC_HUMAN	P11586	101559	human	202038	139397	81877.3				34	33	32				C-1-tetrahydrofolate synthase, cytoplasmic
DDX17_HUMAN	Q92841	80272.4	human	201649	126781	73466.1	1362.4	504.1	3551	23	23	21	8	6	8	Probable ATP-dependent RNA helicase DDX17
TCPZ_HUMAN	P40227	58024.2	human	200645	186947	321656				21	21	21				T-complex protein 1 subunit zeta
HNRPD_HUMAN	Q14103	38434.2	human	199528	107955	60922.8				6	6	6				Heterogeneous nuclear ribonucleoprotein D0
RS10_HUMAN	P46783	18897.8	human	192709	118126	68516.2				5	5	5				40S ribosomal protein S10
TCPG_HUMAN	P49368	60533.9	human	190692	169956	328443				22	21	22				T-complex protein 1 subunit gamma
RS12_HUMAN	P25398	14514.9	human	186005	82074.1	41533				3	3	3				40S ribosomal protein S12
TIF1B_HUMAN	Q13263	88549.7	human	185827	143687	215736				21	21	21				Transcription intermediary factor 1-beta
DDX5_HUMAN	P17844	69148.1	human	182417	134618	77212.7				23	23	21				Probable ATP-dependent RNA helicase DDX5
G3BP1_HUMAN	Q13283	52164.2	human	182388	28248.7	24604.7				13	12	12				Ras GTPase-activating protein-binding protein 1
DX39B_HUMAN	Q13838	48991.3	human	181642	109098	100851				12	12	12				Spliceosome RNA helicase DDX39B
RS4X_HUMAN	P62701	29597.7	human	180682	114898	58625.8	1849.7		2986.8	13	13	13	4		4	40S ribosomal protein S4, X isoform
FAS_HUMAN	P49327	273427	human	177941	170365	175691				76	79	79				Fatty acid synthase
TCPA_HUMAN	P17987	60343.6	human	172072	157095	327696				21	22	22				T-complex protein 1 subunit alpha
DREB_HUMAN	Q16643	71429.3	human	170443	130281	91355.3				15	15	15				Drebrin
PRS7_HUMAN	P35998	48633.8	human	163217	171147	217870				28	28	28				26S proteasome regulatory subunit 7
PPIA_HUMAN	P62937	18012.5	human	159961	95263.9	75005.2	15113.2	6182.3	38349.9	8	8	8	7	6	9	Peptidyl-prolyl cis-trans isomerase A
RS9_HUMAN	P46781	22591.4	human	158615	99372.7	56178.9				7	7	7				40S ribosomal protein S9
NP1L1_HUMAN	P55209	45374.2	human	158598	76646.3	16032.9				7	7	7				Nucleosome assembly protein 1-like 1
U520_HUMAN	O75643	244508	human	157792	85284.6	41964.5				76	74	72				U5 small nuclear ribonucleoprotein 200 kDa helicase
RL23A_HUMAN	P62750	17695.1	human	155830	177780	87318.2	45544.4	25072.6	86735.3	5	6	6	5	5	5	60S ribosomal protein L23a
RL27A_HUMAN	P46776	16561.4	human	153748	148230	124074	90189	14030.1	127413	3	3	3	4	4	4	60S ribosomal protein L27a
PCNA_HUMAN	P12004	28768.8	human	153207	78750.5	89050.6	4249.8	1789.6	5492.5	10	9	7	4	3	4	Proliferating cell nuclear antigen
RS11_HUMAN	P62280	18430.7	human	153147	125217	54183.3				6	6	6				40S ribosomal protein S11
UBA1_HUMAN	P22314	117849	human	151563	86766.3	64419.4				35	36	36				Ubiquitin-like modifier-activating enzyme 1
TBCB_HUMAN	Q99426	27325.5	human	150703	88334.7	70159				9	9	8				Tubulin-folding cofactor B
SPT5H_HUMAN	O00267	121000	human	149344	51888.5	5525.4				39	35	18				Transcription elongation factor SPT5
PRS10_HUMAN	P62333	44173	human	147312	155571	209073				14	14	14				26S proteasome regulatory subunit 10B
RL9_HUMAN	P32969	21863.4	human	146709	95369.4	73019.2				7	6	7				60S ribosomal protein L9
NP1L4_HUMAN	Q99733	42823.4	human	146140	76773.4	13463.3				11	11	8				Nucleosome assembly protein 1-like 4
HNRPF_HUMAN	P52597	45671.8	human	145111	85247.2	69717.9	5473.6		2687.9	8	8	8	5		3	Heterogeneous nuclear ribonucleoprotein F
EIF3M_HUMAN	Q7L2H7	42502.9	human	144481	62440.1	18495.2				12	12	11				Eukaryotic translation initiation factor 3 subunit M
NSF1C_HUMAN	Q9UNZ2	40572.8	human	142050	62266.7	4186.4				14	14	10				NSFL1 cofactor p47
RL18_HUMAN	Q07020	21634.5	human	141760	123183	102847	64722.4	6473.2	64039.4	4	4	4	4	4	4	60S ribosomal protein L18
DHX9_HUMAN	Q08211	140958	human	140187	83334.4	46994.3				43	42	41				ATP-dependent RNA helicase A
CBX1_HUMAN	P83916	21417.8	human	137704	67506.6	26181.1				6	6	6				Chromobox protein homolog 1
CDC37_HUMAN	Q16543	44468.3	human	137285	81098.6	53071.4				11	11	11				Hsp90 co-chaperone Cdc37
TCPE_HUMAN	P48643	59671	human	137233	117563	236062				24	22	23				T-complex protein 1 subunit epsilon
TCPD_HUMAN	P50991	57924.2	human	136961	126387	239471				21	20	21				T-complex protein 1 subunit delta
APT_HUMAN	P07741	19607.8	human	136484	92030.6	109314				6	6	6				Adenine phosphoribosyltransferase
CALU_HUMAN	O43852	37106.8	human	136207	113860	17893.2				13	13	8				Calumenin
PSMD3_HUMAN	O43242	60977.6	human	135827	148102	179269				23	23	23				26S proteasome non-ATPase regulatory subunit 3
KCRB_HUMAN	P12277	42644.3	human	135623	64341.1	39480.5				12	11	12				Creatine kinase B-type
RAGP1_HUMAN	P46060	63541.9	human	135390	62608.6	13069.6				19	19	15				Ran GTPase-activating protein 1
STRAP_HUMAN	Q9Y3F4	38438.3	human	134332	86349.7	96521.6				13	13	13				Serine-threonine kinase receptor-associated protein
PRS6A_HUMAN	P17980	49203.5	human	133896	141961	190651				26	26	26				26S proteasome regulatory subunit 6A
RS6_HUMAN	P62753	28680.6	human	133723	134729	92553.2	14818.6	7100.5	34944.7	6	6	6	4	4	5	40S ribosomal protein S6
MCM2_HUMAN	P49736	101896	human	133110	65025.9	75294.7				28	27	25				DNA replication licensing factor MCM2
USO1_HUMAN	O60763	107895	human	131546	98320.9	43989.3				34	33	32				General vesicular transport factor p115
IF4G1_HUMAN	Q04637	175491	human	131510	71453.9	59615.3				37	36	37				Eukaryotic translation initiation factor 4 gamma 1
HNRPU_HUMAN	Q00839	90584.4	human	130259	59271.5	16912.7				14	14	14				Heterogeneous nuclear ribonucleoprotein U
PRS8_HUMAN	P62195	45626	human	128593	133722	171718				22	22	22				26S proteasome regulatory subunit 8
ROA3_HUMAN	P51991	39594.9	human	128545	68241.1	35211.3				11	11	10				Heterogeneous nuclear ribonucleoprotein A3
AKA12_HUMAN	Q02952	191482	human	127082	69176.3	66291.1			461.7	63	61	62			4	A-kinase anchor protein 12
TCPH_HUMAN	Q99832	59366.6	human	126305	114070	227469				25	24	26				T-complex protein 1 subunit eta
XRCC5_HUMAN	P13010	82704.5	human	126232	71762.4	104508				29	29	27				X-ray repair cross-complementing protein 5
RPAB3_HUMAN	P52434	17143.3	human	125788	57599.9	47131.3				5	5	5				DNA-directed RNA polymerases I, II, and III subunit RPABC3
HDGF_HUMAN	P51858	26788.3	human	124773	125312	109158				11	11	11				Hepatoma-derived growth factor
RL35A_HUMAN	P18077	12537.7	human	124278	78006.1	28786				5	5	5				60S ribosomal protein L35a
RL12_HUMAN	P30050	17818.6	human	123316	83498.8	77320.9				4	4	4				60S ribosomal protein L12
ETFB_HUMAN	P38117	27843.6	human	122932	79471.8	100315				11	11	11				Electron transfer flavoprotein subunit beta
PURA_HUMAN	Q00577	34910.8	human	122650	47645.5	28317.5				7	7	6				Transcriptional activator protein Pur-alpha
RL31_HUMAN	P62899	14462.9	human	121947	67130.2	28914				3	3	3				60S ribosomal protein L31
RS17_HUMAN	P08708	15550.1	human	121446	74219.8	39605.3				6	6	5				40S ribosomal protein S17
FLNA_HUMAN	P21333	280739	human	121333	111364	164616				73	73	73				Filamin-A
PCBP1_HUMAN	Q15365	37497.8	human	120845	77655.3	52430				6	6	6				Poly(rC)-binding protein 1
CBX3_HUMAN	Q13185	20811.4	human	119726	74376.2	63449.1				3	3	3				Chromobox protein homolog 3
CARM1_HUMAN	Q86X55	65853.7	human	119207	130226	97764				7	7	7				Histone-arginine methyltransferase CARM1
ADT3_HUMAN	P12236	32866.3	human	115560	61988.9	32818.2				8	8	8				ADP/ATP translocase 3
NC2B_HUMAN	Q01658	19443.7	human	115411	18617.1	6133.8				4	3	4				Protein Dr1
GEPH_HUMAN	Q9NQX3	79748.4	human	115176	78258	83949.4				20	19	20				Gephyrin
ACTN4_HUMAN	O43707	104854	human	115078	496022	1.0323e+06				38	44	44				Alpha-actinin-4
RS27L_HUMAN	Q71UM5	9477.16	human	114188	66717.1	45978.6				3	3	3				40S ribosomal protein S27-like
RL13_HUMAN	P26373	24261.5	human	113656	105623	79042.7	34378.9	6306	52540.2	5	5	5	5	4	5	60S ribosomal protein L13
MCM7_HUMAN	P33993	81307.9	human	113575	75733	71413.1				30	29	27				DNA replication licensing factor MCM7
TPR_HUMAN	P12270	267293	human	112129	48096.8	18897.9				85	81	72				Nucleoprotein TPR
RL10A_HUMAN	P62906	24831.3	human	111921	62376.5	52459.8	8501.5	2761.8	12421.2	7	7	7	4	3	4	60S ribosomal protein L10a
LRRF1_HUMAN	Q32MZ4	89253	human	111412	56990.4	52812.2				25	25	25				Leucine-rich repeat flightless-interacting protein 1
PARP1_HUMAN	P09874	113084	human	110545	55094.1	14179.1				38	38	30				Poly [ADP-ribose] polymerase 1
CSK22_HUMAN	P19784	41213.2	human	109115	39958.2	20492.8				16	15	15				Casein kinase II subunit alpha'
PRS4_HUMAN	P62191	49184.5	human	108897	114131	154350				20	20	20				26S proteasome regulatory subunit 4
CAPR1_HUMAN	Q14444	78366.2	human	108186	29433.3	34861.2				14	13	13				Caprin-1
TBB6_HUMAN	Q9BUF5	49857.1	human	108006	61786.7	49751.1				11	11	11				Tubulin beta-6 chain
PRS6B_HUMAN	P43686	47366.2	human	107864	126053	166169				19	19	19				26S proteasome regulatory subunit 6B
IF2B1_HUMAN	Q9NZI8	63480.6	human	107703	70735.4	54229.1				16	16	16				Insulin-like growth factor 2 mRNA-binding protein 1
PRP8_HUMAN	Q6P2Q9	273600	human	106621	53559.1	23139.7				83	82	77				Pre-mRNA-processing-splicing factor 8
GOLM1_HUMAN	Q8NBJ4	45333.2	human	105396	130415	227786				16	16	16				Golgi membrane protein 1
UBC12_HUMAN	P61081	20900	human	104421	63678.1	45161				4	4	4				NEDD8-conjugating enzyme Ubc12
PSD11_HUMAN	O00231	47463.8	human	104267	115653	145420				23	24	24				26S proteasome non-ATPase regulatory subunit 11
RL36_HUMAN	Q9Y3U8	12253.7	human	103809	84023.1	76315.2	75882.9		146605	3	3	3	3		3	60S ribosomal protein L36
PSD13_HUMAN	Q9UNM6	42945.5	human	102798	118582	151354				15	15	15				26S proteasome non-ATPase regulatory subunit 13
P4HA1_HUMAN	P13674	61049.3	human	102544	52595.8	51278.5				23	23	23				Prolyl 4-hydroxylase subunit alpha-1
COPB2_HUMAN	P35606	102487	human	102258	66165.3	78326.6				29	28	29				Coatomer subunit beta'
PSMD6_HUMAN	Q15008	45531.3	human	102012	104490	136814				24	24	25				26S proteasome non-ATPase regulatory subunit 6
LMNB1_HUMAN	P20700	66408.3	human	99440.7	92930.3	280424				40	40	42				Lamin-B1
CSK2B_HUMAN	P67870	24942.4	human	98927.4	35067.4	16550.6				3	3	3				Casein kinase II subunit beta
HNRPL_HUMAN	P14866	64132.8	human	98805.9	53181	25776.6				11	10	10				Heterogeneous nuclear ribonucleoprotein L
PSD12_HUMAN	O00232	52904.4	human	98393.1	103132	127670				20	20	20				26S proteasome non-ATPase regulatory subunit 12
HAT1_HUMAN	O14929	49512.6	human	98311.5	58987.1	80574.8				7	7	7				Histone acetyltransferase type B catalytic subunit
PFKAP_HUMAN	Q01813	85596.1	human	97425.1	65793.6	53490.5				19	19	19				ATP-dependent 6-phosphofructokinase, platelet type
DCTN1_HUMAN	Q14203	141695	human	97417.3	98304.3	73643.5				38	38	37				Dynactin subunit 1
RS7_HUMAN	P62081	22126.8	human	97221.9	46438.4	22210.8				8	6	6				40S ribosomal protein S7
PROF1_HUMAN	P07737	15054.2	human	96275.9	64689.2	83745	18968.4	10772	47503.8	6	6	6	5	5	5	Profilin-1
HS904_HUMAN	Q58FG1	47711.9	human	95846.8	50843.3	39686.8				3	3	3				Putative heat shock protein HSP 90-alpha A4
EFTU_HUMAN	P49411	49541.5	human	90448.6	68278.5	47997				18	18	18				Elongation factor Tu, mitochondrial
PPAC_HUMAN	P24666	18042.5	human	90129.7	58804.9	41165.6				5	5	5				Low molecular weight phosphotyrosine protein phosphatase
CLIC1_HUMAN	O00299	26922.7	human	90027.4	60627.5	51165.5				7	7	7				Chloride intracellular channel protein 1
HUWE1_HUMAN	Q7Z6Z7	481891	human	90012.1	55605.2	45231.9				87	84	83				E3 ubiquitin-protein ligase HUWE1
SRSF3_HUMAN	P84103	19329.6	human	89086	61425.9	55153.9				3	3	3				Serine/arginine-rich splicing factor 3
ACTZ_HUMAN	P61163	42613.7	human	87400.9	102430	122732				10	10	10				Alpha-centractin
PACN2_HUMAN	Q9UNF0	55738.6	human	86947.1	45916.6	27782.7				16	15	12				Protein kinase C and casein kinase substrate in neurons protein 2
PURB_HUMAN	Q96QR8	33240.8	human	86493.5	29405.3	10451.1				12	11	8				Transcriptional activator protein Pur-beta
IMB1_HUMAN	Q14974	97170.2	human	86305.2	62936	177974				25	23	26				Importin subunit beta-1
F10A1_HUMAN	P50502	41331.7	human	86269.3	43813.3	151931				7	7	7				Hsc70-interacting protein
NRDC_HUMAN	O43847	131701	human	85345.8	41586.6	15020				32	32	27				Nardilysin
IMA1_HUMAN	P52292	57861.9	human	83686.2	47885.3	31087.1				12	12	12				Importin subunit alpha-1
KBP_HUMAN	Q96EK5	71814	human	83198.4	52421.3	29440.5				16	16	15				KIF-binding protein
CSN4_HUMAN	Q9BT78	46268.8	human	82355.8	68429.7	150718				22	21	22				COP9 signalosome complex subunit 4
DCTN2_HUMAN	Q13561	44231	human	81953.5	94888.7	124790				15	16	16				Dynactin subunit 2
CSN1_HUMAN	Q13098	55536.6	human	80296.1	71951.8	144586				17	17	17				COP9 signalosome complex subunit 1
A4_HUMAN	P05067	86943.2	human	79954.3	40861.9	12340.5				12	12	10				Amyloid-beta precursor protein
MCM3_HUMAN	P25205	90980.8	human	79942.8	48554.3	43484.9				34	32	30				DNA replication licensing factor MCM3
DDX3X_HUMAN	O00571	73243.4	human	79527.3	49763.9	23090.1				23	23	20				ATP-dependent RNA helicase DDX3X
CLH1_HUMAN	Q00610	191615	human	79210.2	58055.6	182946				64	59	65				Clathrin heavy chain 1
RPAB1_HUMAN	P19388	24551.2	human	78716.1	35352.3	24457.6				6	6	6				DNA-directed RNA polymerases I, II, and III subunit RPABC1
HDAC1_HUMAN	Q13547	55103	human	78287.7	51514.6	36990.7				5	5	5				Histone deacetylase 1
RS27_HUMAN	P42677	9461.12	human	78054.8	46618.5	35148.6				3	3	3				40S ribosomal protein S27
RS13_HUMAN	P62277	17222.3	human	77648.6	38184.5	16295.4	11971.9	3929.1	17655.2	6	6	6	3	3	3	40S ribosomal protein S13
RCC1_HUMAN	P18754	44969	human	77217.8	48831.3	28849.7				9	9	9				Regulator of chromosome condensation
COPA_HUMAN	P53621	138346	human	75948.1	51837.8	35524.2				33	32	34				Coatomer subunit alpha
ENOA_HUMAN	P06733	47169	human	75270.3	54761.8	48142.7		977		16	16	17		3		Alpha-enolase
RS2_HUMAN	P15880	31324.4	human	75034.7	49101.4	28956				7	7	7				40S ribosomal protein S2
RL5_HUMAN	P46777	34362.6	human	74934.7	48438.9	20659.1				6	6	6				60S ribosomal protein L5
ACTN1_HUMAN	P12814	103058	human	74700.8	283906	810414				37	45	51				Alpha-actinin-1
CCAR2_HUMAN	Q8N163	102902	human	74478.7	50497.6	32351				20	20	20				Cell cycle and apoptosis regulator protein 2
TSSC4_HUMAN	Q9Y5U2	34325.5	human	74241.4	38317.7	19161.4				3	3	3				Protein TSSC4
ELAV1_HUMAN	Q15717	36091.9	human	74207.4	42668.8	26327.7	3609.6		2614.3	8	8	7	4		3	ELAV-like protein 1
SP16H_HUMAN	Q9Y5B9	119914	human	74203.6	29458.2	3760.9				27	27	13				FACT complex subunit SPT16
SYDC_HUMAN	P14868	57136.2	human	74084	58389.9	67664.5				20	20	20				Aspartate--tRNA ligase, cytoplasmic
CLCA_HUMAN	P09496	27076.7	human	73178.3	60350.7	152284				4	4	4				Clathrin light chain A
CAZA1_HUMAN	P52907	32922.8	human	72391.8	48491.2	57910.1				6	7	7				F-actin-capping protein subunit alpha-1
IDI1_HUMAN	Q13907	26319.2	human	71716.5	48869.9	60090.2				8	8	8				Isopentenyl-diphosphate Delta-isomerase 1
ROA1_HUMAN	P09651	38746.7	human	71714.6	41565	20252	3746.6	1598.3		10	10	10	3	3		Heterogeneous nuclear ribonucleoprotein A1
DDB1_HUMAN	Q16531	126968	human	71209.3	40421.5	91387.9				37	36	37				DNA damage-binding protein 1
COPE_HUMAN	O14579	34482	human	70957.5	39412.9	36890.6				12	12	12				Coatomer subunit epsilon
RO60_HUMAN	P10155	60670.6	human	70519.2	31050.1	14152.1				13	11	10				60 kDa SS-A/Ro ribonucleoprotein
AAMP_HUMAN	Q13685	46750.9	human	70478	40988.7	12408.5				7	7	6				Angio-associated migratory cell protein
SLIRP_HUMAN	Q9GZT3	12349	human	70452.3	42818.4	28854				5	5	5				SRA stem-loop-interacting RNA-binding protein, mitochondrial
PSMD2_HUMAN	Q13200	100200	human	69649.5	72829.8	103359				33	32	32				26S proteasome non-ATPase regulatory subunit 2
MATR3_HUMAN	P43243	94623.2	human	69515.3	35669.4	24003.5				17	17	17				Matrin-3
PSA5_HUMAN	P28066	26411	human	69426.2	102780	1.65162e+06	4560.7		49234.4	8	10	15	3		5	Proteasome subunit alpha type-5
CBR1_HUMAN	P16152	30374.9	human	69288.1	41679.8	39916.4				8	8	8				Carbonyl reductase [NADPH] 1
SF3B6_HUMAN	Q9Y3B4	14584.9	human	68850.5	42003.1	49304.4				3	3	3				Splicing factor 3B subunit 6
IF2A_HUMAN	P05198	36112.2	human	68841.3	39212.9	24148.1				12	12	11				Eukaryotic translation initiation factor 2 subunit 1
SYFA_HUMAN	Q9Y285	57563.6	human	68599	54275.9	60084.6				14	14	14				Phenylalanine--tRNA ligase alpha subunit
RPB3_HUMAN	P19387	31441.2	human	68448.3	31060.2	23204.7				9	9	9				DNA-directed RNA polymerase II subunit RPB3
CH60_HUMAN	P10809	61054.6	human	67607.4	37788.1	79343.4	1389.6	1803.8	1523.3	21	20	21	4	4	4	60 kDa heat shock protein, mitochondrial
PSDE_HUMAN	O00487	34577	human	67429.7	74554.1	95508.5				8	7	8				26S proteasome non-ATPase regulatory subunit 14
SPEE_HUMAN	P19623	33824.7	human	67314.5	40864.6	36798.1				8	8	8				Spermidine synthase
SYVC_HUMAN	P26640	140476	human	67050.6	46263.7	32284.6				30	30	30				Valine--tRNA ligase
MCM5_HUMAN	P33992	82285.5	human	66815.1	38616.9	34731.9				21	20	21				DNA replication licensing factor MCM5
HEXI1_HUMAN	O94992	40623.4	human	66660.6	28444.4	6674				9	9	8				Protein HEXIM1
MCM6_HUMAN	Q14566	92889.3	human	66367.1	39600.8	65173.9				23	23	23				DNA replication licensing factor MCM6
SPTN1_HUMAN	Q13813	284539	human	65779.9	288499	712878				147	173	180				Spectrin alpha chain, non-erythrocytic 1
IPYR_HUMAN	Q15181	32660	human	65537.3	37540.3	26483.3				10	9	8				Inorganic pyrophosphatase
SND1_HUMAN	Q7KZF4	101997	human	65173.4	42214.3	24423.3				29	29	28				Staphylococcal nuclease domain-containing protein 1
SYLC_HUMAN	Q9P2J5	134466	human	64088.7	44510.3	33134.3				34	34	34				Leucine--tRNA ligase, cytoplasmic
RS19_HUMAN	P39019	16060.5	human	63265.2	36248.4	9172.5				5	5	4				40S ribosomal protein S19
PCBP2_HUMAN	Q15366	38580.1	human	63194.4	40378.9	31011.2				4	4	4				Poly(rC)-binding protein 2
RS28_HUMAN	P62857	7841.02	human	62872.4	43458.9	29182.9				3	3	3				40S ribosomal protein S28
SUMO1_HUMAN	P63165	11557	human	62387.7	33747.7	23241.5	16362.3		13877.6	3	3	3	3		3	Small ubiquitin-related modifier 1
PGK1_HUMAN	P00558	44614.7	human	61309.5	38388.7	35741.7				13	13	13				Phosphoglycerate kinase 1
CSN8_HUMAN	Q99627	23225.6	human	60913.4	49891.5	122259				7	7	7				COP9 signalosome complex subunit 8
F169A_HUMAN	Q9Y6X4	74954.8	human	60679.9	26008.6	17158.2				18	17	15				Soluble lamin-associated protein of 75 kDa
RTN4_HUMAN	Q9NQC3	129931	human	59996.9	45856	58620.6				6	7	7				Reticulon-4
SPTB2_HUMAN	Q01082	274609	human	59507.3	283365	649611				122	151	157				Spectrin beta chain, non-erythrocytic 1
GRP75_HUMAN	P38646	73680.5	human	58737.7	34531.2	25006.2				22	22	21				Stress-70 protein, mitochondrial
MCM4_HUMAN	P33991	96557.9	human	58619.9	36744.1	38030.1				23	23	23				DNA replication licensing factor MCM4
RWDD1_HUMAN	Q9H446	27939.5	human	56612.3	34104.3	7045.5				5	5	4				RWD domain-containing protein 1
5NTC_HUMAN	P49902	64969.8	human	56340.8	19587.5	12718.9				14	13	14				Cytosolic purine 5'-nucleotidase
CBR3_HUMAN	O75828	30850.2	human	56272.3	30670.1	26167.7				7	7	6				Carbonyl reductase [NADPH] 3
SAE2_HUMAN	Q9UBT2	71223.6	human	55812.9	33278.5	125212				13	14	14				SUMO-activating enzyme subunit 2
SYYC_HUMAN	P54577	59143.5	human	55482.6	38946.3	26230.2				20	20	20				Tyrosine--tRNA ligase, cytoplasmic
PP4C_HUMAN	P60510	35079.9	human	55288.9	23112.6	19770.9				6	6	6				Serine/threonine-protein phosphatase 4 catalytic subunit
GRWD1_HUMAN	Q9BQ67	49419.2	human	54299.6	30650.9	13251.2				8	8	7				Glutamate-rich WD repeat-containing protein 1
IF2B_HUMAN	P20042	38388.4	human	53934.6	35299.1	16426.1				11	11	9				Eukaryotic translation initiation factor 2 subunit 2
ODPB_HUMAN	P11177	39233.4	human	53445.5	37748.1	27414.3				11	11	11				Pyruvate dehydrogenase E1 component subunit beta, mitochondrial
ARF5_HUMAN	P84085	20529.7	human	53270.3	36049.4	24756.2				6	6	6				ADP-ribosylation factor 5
SF3B1_HUMAN	O75533	145830	human	52799.4	28286.3	40883.7				40	37	39				Splicing factor 3B subunit 1
CSN6_HUMAN	Q7L5N1	36163.5	human	52459.7	42761	102265				10	9	10				COP9 signalosome complex subunit 6
ETFA_HUMAN	P13804	35079.6	human	52141.6	31331.1	38042.7				9	9	9				Electron transfer flavoprotein subunit alpha, mitochondrial
DBLOH_HUMAN	Q9NR28	27130.8	human	51946.5	29161.9	33417.9				6	6	6				Diablo homolog, mitochondrial
PSMD7_HUMAN	P51665	37025.4	human	51806.5	60818.3	77604.7				7	8	8				26S proteasome non-ATPase regulatory subunit 7
PP4R2_HUMAN	Q9NY27	46898	human	51406.3	21121.8	12735				10	10	10				Serine/threonine-protein phosphatase 4 regulatory subunit 2
CHIP_HUMAN	Q9UNE7	34856.2	human	51327.6	32041.8	17755.3				10	10	10				E3 ubiquitin-protein ligase CHIP
PRKDC_HUMAN	P78527	469089	human	50996.7	45713.5	42438.5				104	105	106				DNA-dependent protein kinase catalytic subunit
SAHH_HUMAN	P23526	47716.1	human	50494.5	32768	52796.8				12	12	12				Adenosylhomocysteinase
RPAC1_HUMAN	O15160	39249.7	human	49588.6	26745	14707.8				9	9	9				DNA-directed RNA polymerases I and III subunit RPAC1
COF1_HUMAN	P23528	18502.5	human	49512.2		25816.9				3		3				Cofilin-1
SYSC_HUMAN	P49591	58777.3	human	49396.3	32226.9	26629.7				16	15	16				Serine--tRNA ligase, cytoplasmic
BIEA_HUMAN	P53004	33428.5	human	49340.8	29091.2	23214.8				6	5	5				Biliverdin reductase A
PUR2_HUMAN	P22102	107767	human	49202	33088.3	33505.9				25	25	25				Trifunctional purine biosynthetic protein adenosine-3
RL23_HUMAN	P62829	14865.4	human	49136	26978.3	28111.7				5	5	3				60S ribosomal protein L23
TIM50_HUMAN	Q3ZCQ8	39646.2	human	48993.9	30236.2	17622.9				7	7	6				Mitochondrial import inner membrane translocase subunit TIM50
RHOA_HUMAN	P61586	21768.1	human	48851.7	32941.7	33163.3				3	3	3				Transforming protein RhoA
SMD2_HUMAN	P62316	13526.9	human	48785.8	37069.5	27587.1				6	6	6				Small nuclear ribonucleoprotein Sm D2
SYNC_HUMAN	O43776	62942.9	human	48743.3	29335.1	13848.3				11	11	10				Asparagine--tRNA ligase, cytoplasmic
FEN1_HUMAN	P39748	42593	human	46653	27899.3	18709.2				7	7	6				Flap endonuclease 1
FBRL_HUMAN	P22087	33784.2	human	46304.2	36469.3	21069.4	2666.6		3329.9	6	6	6	3		3	rRNA 2'-O-methyltransferase fibrillarin
TADBP_HUMAN	Q13148	44739.8	human	46213	27904.6	31884.5				6	6	6				TAR DNA-binding protein 43
EMAL4_HUMAN	Q9HC35	108916	human	45985.6	41305.5	21932.9				18	18	18				Echinoderm microtubule-associated protein-like 4
ACADM_HUMAN	P11310	46588.3	human	45837.9	34013.8	29638.8				10	9	9				Medium-chain specific acyl-CoA dehydrogenase, mitochondrial
PYR1_HUMAN	P27708	242984	human	45780.6	61051.8	106809				52	53	56				CAD protein
AP3B1_HUMAN	O00203	121320	human	45592.2	24044.9	6989.3				23	23	19				AP-3 complex subunit beta-1
UBE2O_HUMAN	Q9C0C9	141293	human	45588.6	26289.4	17005.4				23	23	23				(E3-independent) E2 ubiquitin-conjugating enzyme
MLF2_HUMAN	Q15773	28147.3	human	45523	34094.6	30559.2	23976.3	6470	27098.3	7	7	7	6	6	5	Myeloid leukemia factor 2
ELOB_HUMAN	Q15370	13132.8	human	45384.6	26678.6	36820.2				5	5	5				Elongin-B
RL13A_HUMAN	P40429	23577.2	human	45379.1	40261.5	25345.4	16160.2		13993.1	4	4	4	3		3	60S ribosomal protein L13a
NSUN2_HUMAN	Q08J23	86470.7	human	45213.7	27727.9	18690.4				20	20	19				RNA cytosine C(5)-methyltransferase NSUN2
SF3B2_HUMAN	Q13435	100228	human	45205.1	24757.4	17576.7				20	20	19				Splicing factor 3B subunit 2
IMDH2_HUMAN	P12268	55805	human	45165.1	38138.2	29790.6				15	15	15				Inosine-5'-monophosphate dehydrogenase 2
BAD_HUMAN	Q92934	18391.9	human	44874.4	24692.1	16213.5				4	4	4				Bcl2-associated agonist of cell death
SMD1_HUMAN	P62314	13281.6	human	44819.3	36405.4	25596.9	8235.4	1574.3	15531.6	3	3	3	3	3	3	Small nuclear ribonucleoprotein Sm D1
HNRPM_HUMAN	P52272	77515.5	human	44529.2	18845.5	17137				23	21	22				Heterogeneous nuclear ribonucleoprotein M
IPO7_HUMAN	O95373	119517	human	44374.2	32467.5	12816.5				18	17	16				Importin-7
G3BP2_HUMAN	Q9UN86	54121.1	human	44345.9	8410.6	6102.8				6	6	6				Ras GTPase-activating protein-binding protein 2
ARL2_HUMAN	P36404	20878	human	43955.6	33983.5	31677.5				5	5	5				ADP-ribosylation factor-like protein 2
PGRC1_HUMAN	O00264	21671.2	human	43819.2	29843.1	39348				6	6	6				Membrane-associated progesterone receptor component 1
PFKAL_HUMAN	P17858	85018.4	human	43274.7	27516.3	26955.4				12	12	12				ATP-dependent 6-phosphofructokinase, liver type
SPIKE	O00154	41796	human	43267.6	25232.2	37219.1				8	8	8				Cytosolic acyl coenzyme A thioester hydrolase
TALDO_HUMAN	P37837	37540.1	human	43139.3	27107.9	30457.3				7	7	7				Transaldolase
DCTN3_HUMAN	O75935	21119.4	human	43134.2	51725.4	68530.5				6	6	6				Dynactin subunit 3
NCAM1_HUMAN	P13591	94574.2	human	42814.7	21354.1	17899.3				13	13	13				Neural cell adhesion molecule 1
STRN_HUMAN	O43815	86132.1	human	42492.3	21122.2	14762				15	15	14				Striatin
PP1G_HUMAN	P36873	36983.8	human	42363.7	27417.1	24653.5				5	5	5				Serine/threonine-protein phosphatase PP1-gamma catalytic subunit
LONM_HUMAN	P36776	106489	human	42316.5	26962.9	18722				26	26	25				Lon protease homolog, mitochondrial
PSA7_HUMAN	O14818	27886.8	human	42165.8	88914.4	2.14233e+06	2404.9		58156.7	10	12	14	5		8	Proteasome subunit alpha type-7
RPB2_HUMAN	P30876	133897	human	41909.3	20874.5	15775.2				26	25	26				DNA-directed RNA polymerase II subunit RPB2
ESTD_HUMAN	P10768	31462.8	human	41520.8	24638.8	16216.6				3	3	3				S-formylglutathione hydrolase
COPB_HUMAN	P53618	107142	human	41418.8	28127.1	21750.6				22	22	23				Coatomer subunit beta
BUB3_HUMAN	O43684	37154.8	human	41328.7	29240.2	32409.2				7	7	7				Mitotic checkpoint protein BUB3
IF6_HUMAN	P56537	26599.1	human	41212.5	24144.5	20520.2				3	3	3				Eukaryotic translation initiation factor 6
SSRP1_HUMAN	Q08945	81074.8	human	41035	19266.8	3747.7				14	13	11				FACT complex subunit SSRP1
PDIA6_HUMAN	Q15084	48121.3	human	40997.9	33055.2	36009.1			2233.6	11	11	11			3	Protein disulfide-isomerase A6
DHYS_HUMAN	P49366	40970.6	human	40961.6	12916.7	18275.4				10	8	9				Deoxyhypusine synthase
RBBP4_HUMAN	Q09028	47655.7	human	40895.8	24948.5	14732.7				4	3	3				Histone-binding protein RBBP4
PSMD8_HUMAN	P48556	39611.9	human	40679.9	29977.5	51881.2				8	8	8				26S proteasome non-ATPase regulatory subunit 8
SYFB_HUMAN	Q9NSD9	66115.6	human	40538.6	24780.1	25209.9				14	14	14				Phenylalanine--tRNA ligase beta subunit
MRT4_HUMAN	Q9UKD2	27560.5	human	39884.6	22113.1	7664				9	9	9				mRNA turnover protein 4 homolog
GARS_HUMAN	P41250	83165.6	human	39789.6	27466.6	19197.5				14	13	14				Glycine--tRNA ligase
LPPRC_HUMAN	P42704	157905	human	39783.1	29220.4	33754.2				45	45	45				Leucine-rich PPR motif-containing protein, mitochondrial
CAND1_HUMAN	Q86VP6	136376	human	39685.2	28016.5	93572.4				31	34	37				Cullin-associated NEDD8-dissociated protein 1
CAN2_HUMAN	P17655	79995.4	human	39513.3	22696	30716.3				15	15	14				Calpain-2 catalytic subunit
CD2B2_HUMAN	O95400	37646.5	human	39451.6	18087.4	4135.6				7	7	5				CD2 antigen cytoplasmic tail-binding protein 2
PRP19_HUMAN	Q9UMS4	55180.8	human	39080.5	25865.5	19581.3				9	9	9				Pre-mRNA-processing factor 19
IDH3A_HUMAN	P50213	39591.7	human	39020.7	23593	14138.3				7	7	6				Isocitrate dehydrogenase [NAD] subunit alpha, mitochondrial
ODPA_HUMAN	P08559	43295.6	human	38949.5	27976	13953				6	6	6				Pyruvate dehydrogenase E1 component subunit alpha, somatic form, mitochondrial
ROA0_HUMAN	Q13151	30840.6	human	38685.2	24730.6	20714.7				5	5	5				Heterogeneous nuclear ribonucleoprotein A0
DNJA1_HUMAN	P31689	44868.2	human	38445.4	26102.6	18146.8				11	11	10				DnaJ homolog subfamily A member 1
ERF3A_HUMAN	P15170	55755.9	human	38434.6	22789.5	31142.3				11	10	11				Eukaryotic peptide chain release factor GTP-binding subunit ERF3A
PRPS1_HUMAN	P60891	34834.2	human	38417.7	26020.7	14200.2				7	7	7				Ribose-phosphate pyrophosphokinase 1
P4R3A_HUMAN	Q6IN85	95368.3	human	38284.4	16231.8	11469.2				18	18	18				Serine/threonine-protein phosphatase 4 regulatory subunit 3A
SETD7_HUMAN	Q8WTS6	40720.8	human	38191.8	17862.5	12583.5				7	7	7				Histone-lysine N-methyltransferase SETD7
PPP6_HUMAN	O00743	35144.3	human	38136.6	20798.9	17602.1				6	6	6				Serine/threonine-protein phosphatase 6 catalytic subunit
DYN2_HUMAN	P50570	98064.3	human	37811.6	25932.2	22561.3				23	23	23				Dynamin-2
2AAA_HUMAN	P30153	65308.6	human	37739.9	20472.1	22381.8				12	12	11				Serine/threonine-protein phosphatase 2A 65 kDa regulatory subunit A alpha isoform
FUBP2_HUMAN	Q92945	73115.3	human	37730.8	23833	21819.9				18	17	17				Far upstream element-binding protein 2
ST1A1_HUMAN	P50225	34165.3	human	37706.2	24520	18373.2				8	8	8				Sulfotransferase 1A1
PSMD1_HUMAN	Q99460	105836	human	37658.4	32851.3	53518.9				19	19	19				26S proteasome non-ATPase regulatory subunit 1
SPT6H_HUMAN	Q7KZ85	199073	human	37448.7	15285.3					42	39					Transcription elongation factor SPT6
SMC3_HUMAN	Q9UQE7	141542	human	37170.6	39889.7	46651.2				39	40	40				Structural maintenance of chromosomes protein 3
RPB1_HUMAN	P24928	217176	human	36949	15609.4	9247.5				39	38	37				DNA-directed RNA polymerase II subunit RPB1
MYL6_HUMAN	P60660	16930	human	36909.6	24991.8	28853.7				4	4	4				Myosin light polypeptide 6
TOM22_HUMAN	Q9NS69	15521.6	human	36902.6	20675.6	30287				3	3	3				Mitochondrial import receptor subunit TOM22 homolog
RL8_HUMAN	P62917	28024.7	human	36849.8	37901.9	24858.2				3	3	3				60S ribosomal protein L8
CSN5_HUMAN	Q92905	37578.8	human	36491.9	29642.4	80203.6				13	13	14				COP9 signalosome complex subunit 5
6PGD_HUMAN	P52209	53140	human	36376	21609.8	23036.8				12	12	12				6-phosphogluconate dehydrogenase, decarboxylating
NIBA1_HUMAN	Q9BZQ8	103135	human	36310.3	26646.4	20346.1				15	14	14				Protein Niban 1
NCBP2_HUMAN	P52298	18001.1	human	36217	21635.3	15666.8				4	4	4				Nuclear cap-binding protein subunit 2
MSH2_HUMAN	P43246	104743	human	36208.2	24374.8	20270.3				25	25	24				DNA mismatch repair protein Msh2
CSN2_HUMAN	P61201	51596.7	human	36049.4	27664.6	61797.5				16	14	16				COP9 signalosome complex subunit 2
PRDX2_HUMAN	P32119	21891.9	human	35817.5	30151.7	20627.8				6	6	6				Peroxiredoxin-2
ADT2_HUMAN	P05141	32852.2	human	35816.6	17918.6	11458.3				3	3	3				ADP/ATP translocase 2
IF5A1_HUMAN	P63241	16832.2	human	35672.3	24313.9	19457.7				6	6	5				Eukaryotic translation initiation factor 5A-1
P3H1_HUMAN	Q32P28	83393.9	human	35607.3	25531.5	20912.4				14	13	14				Prolyl 3-hydroxylase 1
GLYM_HUMAN	P34897	55993	human	35041.5	20225.3	19916.1				12	12	12				Serine hydroxymethyltransferase, mitochondrial
FPPS_HUMAN	P14324	48275.5	human	34589.3	20254.1	17749.3				5	5	5				Farnesyl pyrophosphate synthase
P5CS_HUMAN	P54886	87302.3	human	34572.8	21746.3	20900.2				19	18	18				Delta-1-pyrroline-5-carboxylate synthase
AP3S1_HUMAN	Q92572	21732.1	human	34512.9	20595.1	7331.8				4	4	4				AP-3 complex subunit sigma-1
ATPA_HUMAN	P25705	59750.6	human	34334.4	25968.7	37983.3				16	16	16				ATP synthase subunit alpha, mitochondrial
SKP1_HUMAN	P63208	18658	human	34328.5	24460.6	29230.1				4	4	4				S-phase kinase-associated protein 1
GALK1_HUMAN	P51570	42272.2	human	34289.5	26301.9	19476.8				6	6	6				Galactokinase
STRN3_HUMAN	Q13033	87209.3	human	34239.1	16931.4	9942.7				16	16	15				Striatin-3
PSA3_HUMAN	P25788	28433.2	human	34203.3	73114.2	1.499e+06			54802.9	10	11	14			8	Proteasome subunit alpha type-3
XPO2_HUMAN	P55060	110417	human	34090.9	27995	38423.6				18	19	19				Exportin-2
TCAB1_HUMAN	Q9BUR4	59309.4	human	33772.6	16376	10193.5				8	8	7				Telomerase Cajal body protein 1
PCH2_HUMAN	Q15645	48550.8	human	33771.1	23133.3	22828.8				13	13	13				Pachytene checkpoint protein 2 homolog
TAGL2_HUMAN	P37802	22391.4	human	33771	16753.2	15146.9				8	8	8				Transgelin-2
WDR12_HUMAN	Q9GZL7	47707.9	human	33680.6	18365	16947				8	8	8				Ribosome biogenesis protein WDR12
ACDSB_HUMAN	P45954	47485.4	human	33004.9	24340.8	16957.2				8	8	8				Short/branched chain specific acyl-CoA dehydrogenase, mitochondrial
SYIC_HUMAN	P41252	144498	human	32695.2	36127.6	34294.3				25	25	24				Isoleucine--tRNA ligase, cytoplasmic
ADRO_HUMAN	P22570	53836.8	human	32660.5	24851.1	18765.2				13	13	13				NADPH:adrenodoxin oxidoreductase, mitochondrial
GET3_HUMAN	O43681	38792.8	human	32605.3	16770.2	18019.7				9	9	9				ATPase GET3
BT3L4_HUMAN	Q96K17	17270.5	human	32442.2	19045.9	61000.2				3	3	4				Transcription factor BTF3 homolog 4
NC2A_HUMAN	Q14919	22349.8	human	32397.8						3						Dr1-associated corepressor
OTUB1_HUMAN	Q96FW1	31284.1	human	32182.9	19221.4	21014.3				8	7	8				Ubiquitin thioesterase OTUB1
USP9X_HUMAN	Q93008	290463	human	31960.6	28903.7	48138.3				49	47	51				Probable ubiquitin carboxyl-terminal hydrolase FAF-X
XPO1_HUMAN	O14980	123386	human	31850.3	23035.4	29703.1				21	20	21				Exportin-1
SART3_HUMAN	Q15020	109935	human	31513.4	12755.2	1648.7				23	22	13				Squamous cell carcinoma antigen recognized by T-cells 3
PFD2_HUMAN	Q9UHV9	16647.8	human	31478.4	26147.5	39196.9				5	5	5				Prefoldin subunit 2
NAA10_HUMAN	P41227	26458.5	human	31463.4	18582.5	15937				6	6	6				N-alpha-acetyltransferase 10
HNRH3_HUMAN	P31942	36926.5	human	31447.7	19422.3	9837.4				5	4	4				Heterogeneous nuclear ribonucleoprotein H3
ACL6A_HUMAN	O96019	47461	human	31366.6	18936.5	19248.8				9	9	9				Actin-like protein 6A
TP53B_HUMAN	Q12888	213574	human	31351.6	15674.8	15483				33	33	33				TP53-binding protein 1
SYTC_HUMAN	P26639	83435.1	human	31342.1	20110.7	15354.7				20	20	20				Threonine--tRNA ligase 1, cytoplasmic
SAR1A_HUMAN	Q9NR31	22366.8	human	31240.3	16616.7	10143.7				7	7	4				GTP-binding protein SAR1a
RIPL1_HUMAN	Q5EBL4	47107.9	human	30916.1	16870.8	11211.7				13	12	11				RILP-like protein 1
IF2G_HUMAN	P41091	51109.5	human	30857.3	19767.1	11816.7				11	10	11				Eukaryotic translation initiation factor 2 subunit 3
JMJD6_HUMAN	Q6NYC1	46462	human	30750.9	19496.1	11495.9				8	8	7				Bifunctional arginine demethylase and lysyl-hydroxylase JMJD6
PSMD4_HUMAN	P55036	40736.7	human	30595.3	16092.8	30688.9				7	7	7				26S proteasome non-ATPase regulatory subunit 4
TEBP_HUMAN	Q15185	18697.4	human	30047.9	15320.7	5617.6				5	4	4				Prostaglandin E synthase 3
SMC1A_HUMAN	Q14683	143233	human	29949.8	32897.1	37423.2				35	36	36				Structural maintenance of chromosomes protein 1A
ARF4_HUMAN	P18085	20510.8	human	29906.7	18229	16097.6				4	4	4				ADP-ribosylation factor 4
CRTAP_HUMAN	O75718	46561.9	human	29877.3	23349.4	16084.1				7	7	7				Cartilage-associated protein
SNX2_HUMAN	O60749	58471.1	human	29863.7	16303	30360.2				16	16	16				Sorting nexin-2
NFL_HUMAN	P07196	61516.6	human	29848.2	14699	5546.3				15	15	12				Neurofilament light polypeptide
BCCIP_HUMAN	Q9P287	35979.5	human	29815.6	15644.4	12530.8				8	8	8				BRCA2 and CDKN1A-interacting protein
EIPR1_HUMAN	Q53HC9	43603.3	human	29655.7	14197	9491				5	5	5				EARP and GARP complex-interacting protein 1
RL6_HUMAN	Q02878	32727.9	human	29555.7	26675.5	17332.9	13390.7	4370.4	30180.9	6	6	6	7	6	6	60S ribosomal protein L6
SYAC_HUMAN	P49588	106810	human	29340.2	19599.6	16891.6				26	26	26				Alanine--tRNA ligase, cytoplasmic
SRP68_HUMAN	Q9UHB9	70729.6	human	29176.7	18992.3	9083.9				16	16	16				Signal recognition particle subunit SRP68
HNRDL_HUMAN	O14979	46437.5	human	29171.3	13755					4	4					Heterogeneous nuclear ribonucleoprotein D-like
GSTM3_HUMAN	P21266	26559.6	human	28894.9	20685.3	18964.4				8	8	8				Glutathione S-transferase Mu 3
DNJB1_HUMAN	P25685	38044.1	human	28882.6	17376.3	12001.2				5	5	5				DnaJ homolog subfamily B member 1
BZW1_HUMAN	Q7L1Q6	48043.2	human	28684.1	17070.4	13605				10	10	9				Basic leucine zipper and W2 domain-containing protein 1
RPA1_HUMAN	O95602	194811	human	28681.1	16264.9	9051.6				30	29	25				DNA-directed RNA polymerase I subunit RPA1
NDKB_HUMAN	P22392	17298	human	28653.6	17413.7	19244.1				4	4	4				Nucleoside diphosphate kinase B
DEK_HUMAN	P35659	42674.3	human	28641.8	12360.5	5315.8				4	4	4				Protein DEK
FLII_HUMAN	Q13045	144751	human	28040.3	13677.7	13172.9				21	21	20				Protein flightless-1 homolog
SMC4_HUMAN	Q9NTJ3	147182	human	27892.3	29033.6	41651.2				34	34	37				Structural maintenance of chromosomes protein 4
CAPZB_HUMAN	P47756	31350.5	human	27844.5	20229.5	27971.7				5	5	5				F-actin-capping protein subunit beta
MPPA_HUMAN	Q10713	58252.9	human	27795.2	20591.1	24574.4				11	10	11				Mitochondrial-processing peptidase subunit alpha
COPG2_HUMAN	Q9UBF2	97622.3	human	27758.4	19595.1	16854.1				13	14	14				Coatomer subunit gamma-2
ELOC_HUMAN	Q15369	12473.2	human	27725.1	13699	19562.3				3	3	3				Elongin-C
NTPCR_HUMAN	Q9BSD7	20713.1	human	27643	20464.7	18753.3				6	6	6				Cancer-related nucleoside-triphosphatase
PYRG1_HUMAN	P17812	66690.4	human	27240.3	19449.8	15346				10	9	9				CTP synthase 1
LGUL_HUMAN	Q04760	20777.7	human	27185.3	16576.1	9199.9				5	5	5				Lactoylglutathione lyase
IF5_HUMAN	P55010	49222.7	human	27116.8	14412.6	14314.8				5	5	5				Eukaryotic translation initiation factor 5
GLRX3_HUMAN	O76003	37432	human	26776	16418.1	13315				8	8	8				Glutaredoxin-3
RL7_HUMAN	P18124	29225.8	human	26749.3	20977.5	12132.1	3978.1		7873.1	7	7	7	4		4	60S ribosomal protein L7
IF4G2_HUMAN	P78344	102362	human	26647.2	15948.5	9187.4				21	20	20				Eukaryotic translation initiation factor 4 gamma 2
HYOU1_HUMAN	Q9Y4L1	111335	human	26606.2	13445.1	20872.2				25	25	25				Hypoxia up-regulated protein 1
TMX4_HUMAN	Q9H1E5	38952.2	human	26371.7	22202.3	13411.8				3	3	3				Thioredoxin-related transmembrane protein 4
RTCB_HUMAN	Q9Y3I0	55210.3	human	26339.7	16215.1	11913.7				12	12	11				RNA-splicing ligase RtcB homolog
LRC47_HUMAN	Q8N1G4	63472.9	human	26108.1	15225.5	9696.5				12	12	12				Leucine-rich repeat-containing protein 47
WDR1_HUMAN	O75083	66193.5	human	26096.8	16653.4	15872.2				8	8	8				WD repeat-containing protein 1
RL10_HUMAN	P27635	24603.9	human	25995.6	17276.6	16228.9				3	3	3				60S ribosomal protein L10
AIFM1_HUMAN	O95831	66900.6	human	25912.8	14383.1	17547.4				11	11	11				Apoptosis-inducing factor 1, mitochondrial
CSDE1_HUMAN	O75534	88884.7	human	25706.9	20502.9	13856.2				19	19	19				Cold shock domain-containing protein E1
PSA1_HUMAN	P25786	29555.6	human	25618.4	55757.9	1.44222e+06	2536.1		46447.4	10	11	16	7		7	Proteasome subunit alpha type-1
HXK1_HUMAN	P19367	102486	human	25563.2	16566.2	2926.6				23	22	17				Hexokinase-1
VPS29_HUMAN	Q9UBQ0	20505.7	human	25446.2	15784.2	12146.5				3	3	3				Vacuolar protein sorting-associated protein 29
TTL12_HUMAN	Q14166	74403.6	human	25394.3	14296.9	12071.6				13	12	13				Tubulin--tyrosine ligase-like protein 12
SYRC_HUMAN	P54136	75379	human	25331.4	23925.5	21289.7				16	16	16				Arginine--tRNA ligase, cytoplasmic
SCRN1_HUMAN	Q12765	46382.1	human	25182.5	22446.2	24511.6				9	9	9				Secernin-1
PSB5_HUMAN	P28074	28480.3	human	25084.1	57088.3	1483472	1414.3		44671.8	8	7	14	5		7	Proteasome subunit beta type-5
ACINU_HUMAN	Q9UKV3	151862	human	24998	12423.8	13380.5				17	17	17				Apoptotic chromatin condensation inducer in the nucleus
CSN3_HUMAN	Q9UNS2	47873.1	human	24792.4	22330.9	46125.7				8	8	8				COP9 signalosome complex subunit 3
MTA2_HUMAN	O94776	75023.1	human	24655.7	18600.7	12795.1				14	14	13				Metastasis-associated protein MTA2
UB2R1_HUMAN	P49427	26736.8	human	24365.2	12533.7	4490.2				3	3	3				Ubiquitin-conjugating enzyme E2 R1
ECHB_HUMAN	P55084	51294.4	human	24314.2	16679	30923.4				14	14	14				Trifunctional enzyme subunit beta, mitochondrial
CSN7B_HUMAN	Q9H9Q2	29622	human	24014.6	22299.3	44890.1				5	5	5				COP9 signalosome complex subunit 7b
RBM14_HUMAN	Q96PK6	69491.6	human	24001.6	18282.3	15997				9	9	9				RNA-binding protein 14
ASNS_HUMAN	P08243	64369.9	human	23982.1	19136.2	6675.2				11	10	9				Asparagine synthetase [glutamine-hydrolyzing]
SDHA_HUMAN	P31040	72691.5	human	23854.1	17177.5	13273				9	9	9				Succinate dehydrogenase [ubiquinone] flavoprotein subunit, mitochondrial
KINH_HUMAN	P33176	109685	human	23792.8	22328.9	31556.6				27	28	28				Kinesin-1 heavy chain
CIA2B_HUMAN	Q9Y3D0	17663	human	23714.8	14814.2	11481.7				3	3	3				Cytosolic iron-sulfur assembly component 2B
DPYL2_HUMAN	Q16555	62293.6	human	23639.3	14591.8	13125.7				16	16	16				Dihydropyrimidinase-related protein 2
SYEP_HUMAN	P07814	170591	human	23416.6	27204.5	24582				32	34	33				Bifunctional glutamate/proline--tRNA ligase
RENT1_HUMAN	Q92900	124345	human	23214.3	15730.3	17570.9				23	23	24				Regulator of nonsense transcripts 1
NAA15_HUMAN	Q9BXJ9	101272	human	23189	15689.7	16040				17	17	17				N-alpha-acetyltransferase 15, NatA auxiliary subunit
GUAA_HUMAN	P49915	76715.4	human	23178.5	16169.6	13505.8				11	11	11				GMP synthase [glutamine-hydrolyzing]
RS24_HUMAN	P62847	15423.2	human	23172.2	21252.2	15602.8	4086.5		7416.5	3	3	3	3		3	40S ribosomal protein S24
TPM3_HUMAN	P06753	32950	human	23165.2	31424.2	240894				7	7	7				Tropomyosin alpha-3 chain
PSME3_HUMAN	P61289	29506	human	23148.1	15979.2	108506				7	7	8				Proteasome activator complex subunit 3
SNX6_HUMAN	Q9UNH7	46648.8	human	23061.9	15157.8	9906.9				10	10	10				Sorting nexin-6
SMC2_HUMAN	O95347	135656	human	23018	23974.6	32533.2				35	36	37				Structural maintenance of chromosomes protein 2
PWP1_HUMAN	Q13610	55827.9	human	22939.5	13622.2	2943.4				10	10	7				Periodic tryptophan protein 1 homolog
COPD_HUMAN	P48444	57210.4	human	22854.2	12106.7	13137.4				8	8	8				Coatomer subunit delta
ECHA_HUMAN	P40939	82999.6	human	22718.3	14523.5	22964.6				21	21	21				Trifunctional enzyme subunit alpha, mitochondrial
NSDHL_HUMAN	Q15738	41900.3	human	22630.2	16172.3	10809.6				7	7	7				Sterol-4-alpha-carboxylate 3-dehydrogenase, decarboxylating
SMAP_HUMAN	O00193	20332.5	human	22618.4	9834.1					3	3					Small acidic protein
HMCS1_HUMAN	Q01581	57293.6	human	22591.4	14599.4	35791				11	11	11				Hydroxymethylglutaryl-CoA synthase, cytoplasmic
GYS1_HUMAN	P13807	83785.5	human	22410.4	16548.6	10177.5				11	11	11				Glycogen [starch] synthase, muscle
PRP6_HUMAN	O94906	106925	human	22392.5	12690.1	5543.9				20	19	18				Pre-mRNA-processing factor 6
SFPQ_HUMAN	P23246	76149.3	human	22380.1	8659	3228.9				11	10	7				Splicing factor, proline- and glutamine-rich
OGFD1_HUMAN	Q8N543	63246.2	human	22317.3	10505.4	11132.5				8	8	8				Prolyl 3-hydroxylase OGFOD1
DC1I2_HUMAN	Q13409	71456.6	human	22306.9	16607.8	45535.6				11	12	12				Cytoplasmic dynein 1 intermediate chain 2
BOP1_HUMAN	Q14137	83629.5	human	21899.6	9527.5	1717.7				12	12	6				Ribosome biogenesis protein BOP1
UBP7_HUMAN	Q93009	128302	human	21549.8	14242.7	17729.4				24	24	24				Ubiquitin carboxyl-terminal hydrolase 7
DD19A_HUMAN	Q9NUU7	53975	human	21515.9	14260.4	11759.9				11	11	11				ATP-dependent RNA helicase DDX19A
MTNA_HUMAN	Q9BV20	39149.8	human	21464.5	15761.6	15251.8				8	8	8				Methylthioribose-1-phosphate isomerase
NEK9_HUMAN	Q8TD19	107168	human	21459.8	16315.5	21096.9				16	16	16				Serine/threonine-protein kinase Nek9
RAB1B_HUMAN	Q9H0U4	22171.2	human	21409.5	10005.9	8583.5				6	6	6				Ras-related protein Rab-1B
MTA3_HUMAN	Q9BTC8	67503.7	human	21371.5	13740.4	9005.4				9	9	9				Metastasis-associated protein MTA3
DHX15_HUMAN	O43143	90932.8	human	21240.8	12056.5	5515.9				12	12	11				Pre-mRNA-splicing factor ATP-dependent RNA helicase DHX15
UBP5_HUMAN	P45974	95786.3	human	21057.2	12523.2	29692.6				20	20	21				Ubiquitin carboxyl-terminal hydrolase 5
PP6R3_HUMAN	Q5H9R7	97669.1	human	20834.7	14145.7	9060.2				13	15	13				Serine/threonine-protein phosphatase 6 regulatory subunit 3
PSB6_HUMAN	P28072	25357.7	human	20834.1		1.30162e+06				3		6				Proteasome subunit beta type-6
DYHC1_HUMAN	Q14204	532408	human	20821.7	21202.2	41700.9				131	132	137				Cytoplasmic dynein 1 heavy chain 1
PSB4_HUMAN	P28070	29204.2	human	20816.2	59583.7	1.49521e+06			52433.9	6	8	8			5	Proteasome subunit beta type-4
CSN7A_HUMAN	Q9UBW8	30276.6	human	20791.3	15265.6	29331.7				6	6	6				COP9 signalosome complex subunit 7a
STRN4_HUMAN	Q9NRL3	80596.1	human	20736.8	9573.1	6357.1				13	11	12				Striatin-4
IF2B2_HUMAN	Q9Y6M1	66121.4	human	20687.2	13507.8	10619.6				12	12	12				Insulin-like growth factor 2 mRNA-binding protein 2
CAB45_HUMAN	Q9BRK5	41806.8	human	20643.4	12923	6781.3				6	6	6				45 kDa calcium-binding protein
PESC_HUMAN	O00541	68002.6	human	20578	8831.1	1952.8				8	8	4				Pescadillo homolog
2ABA_HUMAN	P63151	51692.1	human	20513.4	14541.8	14955.8				7	7	7				Serine/threonine-protein phosphatase 2A 55 kDa regulatory subunit B alpha isoform
DYR_HUMAN	P00374	21452.7	human	20229.8	13623	10072.4				5	5	5				Dihydrofolate reductase
VPS35_HUMAN	Q96QK1	91707	human	20225.2	13701.3	17266.9				13	13	13				Vacuolar protein sorting-associated protein 35
HERC2_HUMAN	O95714	527228	human	20174	9778.4					3	3					E3 ubiquitin-protein ligase HERC2
AL7A1_HUMAN	P49419	58487.2	human	20172.3	11284.2	7986.2				8	8	8				Alpha-aminoadipic semialdehyde dehydrogenase
MP2K2_HUMAN	P36507	44424.1	human	20113.9	12916.6	11529.5				7	7	7				Dual specificity mitogen-activated protein kinase kinase 2
SYMC_HUMAN	P56192	101116	human	20074.8	16422.1	15734.2				15	15	15				Methionine--tRNA ligase, cytoplasmic
CBX5_HUMAN	P45973	22225	human	20002.5	10417.6					3	3					Chromobox protein homolog 5
RS15_HUMAN	P62841	17040.1	human	19795.1						3						40S ribosomal protein S15
ARI2_HUMAN	O95376	57818.9	human	19791.2	11102.8	5326.8				9	9	8				E3 ubiquitin-protein ligase ARIH2
SYF1_HUMAN	Q9HCS7	100010	human	19780.9	11462.3	6634.5				18	18	17				Pre-mRNA-splicing factor SYF1
RAB9A_HUMAN	P51151	22837.6	human	19546.3	13448.3	12572.5				5	5	5				Ras-related protein Rab-9A
PRDX4_HUMAN	Q13162	30539.9	human	19544.6	20857.2	66020.2				5	5	5				Peroxiredoxin-4
RAB10_HUMAN	P61026	22540.9	human	19531.3	14153.9	13949.2				4	4	4				Ras-related protein Rab-10
MARE1_HUMAN	Q15691	29999.1	human	19513.2	10899.5	18948.5				7	7	7				Microtubule-associated protein RP/EB family member 1
PDCD4_HUMAN	Q53EL6	51735.2	human	19482.9	10929.8	5676.6				9	9	7				Programmed cell death protein 4
METK2_HUMAN	P31153	43660.7	human	19435.4	12348.9	8089.8				5	5	5				S-adenosylmethionine synthase isoform type-2
PRDX6_HUMAN	P30041	25035	human	19247.8	12949.4	9957.5				8	8	8				Peroxiredoxin-6
PSA6_HUMAN	P60900	27399.5	human	19179.7	46716.7	1.06843e+06	1644.1		62062.3	10	10	14	6		8	Proteasome subunit alpha type-6
PIN1_HUMAN	Q13526	18243.3	human	19124.4	8774.2	7356				3	3	3				Peptidyl-prolyl cis-trans isomerase NIMA-interacting 1
SSRA_HUMAN	P43307	32235.3	human	19121.7		10086.6				3		3				Translocon-associated protein subunit alpha
PSB1_HUMAN	P20618	26489.4	human	19082.3	63422.3	1.75044e+06	2065.5		75235.5	7	11	15	5		7	Proteasome subunit beta type-1
SCAM3_HUMAN	O14828	38287	human	18994.6	32304.9	50721.9				7	7	7				Secretory carrier-associated membrane protein 3
E41L2_HUMAN	O43491	112588	human	18972.9	13701.6	26471.8				22	22	22				Band 4.1-like protein 2
MBD3_HUMAN	O95983	32844.1	human	18952.2	12214.1	6007.3				5	5	4				Methyl-CpG-binding domain protein 3
GSTP1_HUMAN	P09211	23355.8	human	18925.5	8294.2	5117.5				5	5	4				Glutathione S-transferase P
RBM4_HUMAN	Q9BWF3	40313.8	human	18843.4	13313.6	11269.4				5	5	5				RNA-binding protein 4
KAP2_HUMAN	P13861	45518.4	human	18671.5	12714.9	13223.7				12	12	12				cAMP-dependent protein kinase type II-alpha regulatory subunit
GAPD1_HUMAN	Q14C86	164980	human	18671.2	16358.8	28551.7				24	24	24				GTPase-activating protein and VPS9 domain-containing protein 1
CPVL_HUMAN	Q9H3G5	54163.8	human	18614.2	8754	13814				8	6	8				Probable serine carboxypeptidase CPVL
CLPP_HUMAN	Q16740	30180	human	18453.2	10853.8	6890.1				6	6	6				ATP-dependent Clp protease proteolytic subunit, mitochondrial
RL17_HUMAN	P18621	21397	human	18267.4	15591.2	15380.3	3974.9		6855.3	4	4	4	3		3	60S ribosomal protein L17
COPG1_HUMAN	Q9Y678	97718.2	human	18162.6	9950.3	10261.9				13	13	13				Coatomer subunit gamma-1
CTBP2_HUMAN	P56545	48944.9	human	17963.7	10128.4	7497.8				5	5	5				C-terminal-binding protein 2
UBP10_HUMAN	Q14694	87133.8	human	17780.1	7601.7	5437.4				10	9	8				Ubiquitin carboxyl-terminal hydrolase 10
RFA1_HUMAN	P27694	68138.2	human	17759.2	11576.5	16813.8				14	15	15				Replication protein A 70 kDa DNA-binding subunit
UBP47_HUMAN	Q96K76	157311	human	17716.1	11799.5	11380.7				29	29	28				Ubiquitin carboxyl-terminal hydrolase 47
ERP44_HUMAN	Q9BS26	46971.2	human	17565.6	8475.6	14781.3				7	6	6				Endoplasmic reticulum resident protein 44
TXNL1_HUMAN	O43396	32251.3	human	17544.8	8803.6	9076.5				7	7	7				Thioredoxin-like protein 1
ARF6_HUMAN	P62330	20082.2	human	17531.4	14933.2	10226.6				3	3	3				ADP-ribosylation factor 6
SRRT_HUMAN	Q9BXP5	100666	human	17444.9	9103.3	2765.4				12	12	10				Serrate RNA effector molecule homolog
HNRPQ_HUMAN	O60506	69602.6	human	17407.4	7322.4	2890.7				8	8	6				Heterogeneous nuclear ribonucleoprotein Q
SH3G1_HUMAN	Q99961	41489.9	human	17391.3	11619.1	5919				5	5	4				Endophilin-A2
TF3C5_HUMAN	Q9Y5Q8	59570.8	human	17365.4	8834.2	3896				11	11	9				General transcription factor 3C polypeptide 5
NUP93_HUMAN	Q8N1F7	93488.3	human	17327.8	8125.8	7991.7				15	15	15				Nuclear pore complex protein Nup93
UBP14_HUMAN	P54578	56069.1	human	17304.6	10367.2	10345.3				9	9	9				Ubiquitin carboxyl-terminal hydrolase 14
VAT1_HUMAN	Q99536	41920.2	human	17289.3	9729.4	13071.8				4	4	4				Synaptic vesicle membrane protein VAT-1 homolog
HPRT_HUMAN	P00492	24579.4	human	17247	11247.6	13915.4				5	5	5				Hypoxanthine-guanine phosphoribosyltransferase
EFTS_HUMAN	P43897	35390.7	human	17244.4	8992.8	5791.1				5	5	5				Elongation factor Ts, mitochondrial
CYBP_HUMAN	Q9HB71	26209.9	human	17193.8	10416.1	8898.6				7	7	7				Calcyclin-binding protein
TPPC3_HUMAN	O43617	20274.1	human	17184.3	13452.9	17357.5				4	3	4				Trafficking protein particle complex subunit 3
CHK2_HUMAN	O96017	60914.8	human	17095.8	9096	5929.2				8	7	8				Serine/threonine-protein kinase Chk2
TECR_HUMAN	Q9NZ01	36034.4	human	17069.8	12924.4	9970.7				4	4	4				Very-long-chain enoyl-CoA reductase
TCTP_HUMAN	P13693	19595.3	human	16971.2	7329.7	3359.6				3	3	3				Translationally-controlled tumor protein
AKTS1_HUMAN	Q96B36	27383.3	human	16967.2	9525.3	7465.9				4	4	4				Proline-rich AKT1 substrate 1
CTNB1_HUMAN	P35222	85496.6	human	16922.5	7904.7	18223.1				13	11	13				Catenin beta-1
RHEB_HUMAN	Q15382	20497.5	human	16892	13507	11931.4				6	6	6				GTP-binding protein Rheb
GTF2I_HUMAN	P78347	112416	human	16781.5	11318.5	18978.4				21	22	21				General transcription factor II-I
PSA_HUMAN	P55786	103276	human	16767.7	9388.5	9741.7				20	20	20				Puromycin-sensitive aminopeptidase
IDH3B_HUMAN	O43837	42183.7	human	16632.8	12224.6	8027.7				6	6	6				Isocitrate dehydrogenase [NAD] subunit beta, mitochondrial
TIM44_HUMAN	O43615	51355.7	human	16553.3	9543.6	7631.9				10	10	10				Mitochondrial import inner membrane translocase subunit TIM44
SNR40_HUMAN	Q96DI7	39310.5	human	16468.3	10075.1	7534.3				5	5	5				U5 small nuclear ribonucleoprotein 40 kDa protein
SMCE1_HUMAN	Q969G3	46649.4	human	16467.1	12612.7	11352.2				7	7	7				SWI/SNF-related matrix-associated actin-dependent regulator of chromatin subfamily E member 1
TMX1_HUMAN	Q9H3N1	31791.2	human	16434.7	9385.9	11290.1				5	5	5				Thioredoxin-related transmembrane protein 1
JIP4_HUMAN	O60271	146205	human	16391.2	30240.9	105398				33	36	42				C-Jun-amino-terminal kinase-interacting protein 4
GPX1_HUMAN	P07203	22088.2	human	16379.7	12347.4	18488.3				4	4	4				Glutathione peroxidase 1
RFA3_HUMAN	P35244	13568.7	human	16379.6	8718.2	11882.1				4	4	4				Replication protein A 14 kDa subunit
MK01_HUMAN	P28482	41389.7	human	16256	9848.6	7076.4				7	6	7				Mitogen-activated protein kinase 1
EI2BE_HUMAN	Q13144	80379.9	human	16127.3	7895.6	3478.9				3	3	3				Translation initiation factor eIF-2B subunit epsilon
MSH6_HUMAN	P52701	152786	human	16020.9	10424	6915.6				20	19	19				DNA mismatch repair protein Msh6
RAB13_HUMAN	P51153	22774.1	human	16019.4	10849.6	9217.2				3	3	3				Ras-related protein Rab-13
DYL1_HUMAN	P63167	10365.9	human	16017.9	7834.1	10164.3				3	3	3				Dynein light chain 1, cytoplasmic
CCD47_HUMAN	Q96A33	55873.8	human	15992.1	6108.8	412.8				10	10	3				Coiled-coil domain-containing protein 47
CATD_HUMAN	P07339	44552.2	human	15963.4	9121.2	8458.6				5	5	5				Cathepsin D
RRP44_HUMAN	Q9Y2L1	109003	human	15666.2	10319.1	7194.2				15	15	15				Exosome complex exonuclease RRP44
RM11_HUMAN	Q9Y3B7	20683.2	human	15652.4	9700.5	7671.6				6	6	6				39S ribosomal protein L11, mitochondrial
NAKD2_HUMAN	Q4G0N4	49432.9	human	15615.2	10797.3	9765.1				10	10	9				NAD kinase 2, mitochondrial
DPM1_HUMAN	O60762	29634.3	human	15471	9626.1	7142.8				5	5	4				Dolichol-phosphate mannosyltransferase subunit 1
UCK2_HUMAN	Q9BZX2	29299.1	human	15311	12105.6	9642.6				5	5	5				Uridine-cytidine kinase 2
SBDS_HUMAN	Q9Y3A5	28763.5	human	15286.8	10197.9	8132.2				4	4	4				Ribosome maturation protein SBDS
MTREX_HUMAN	P42285	117805	human	15252.9	10801.7	11854.7				16	15	16				Exosome RNA helicase MTR4
RALY_HUMAN	Q9UKM9	32463.2	human	15245	5409.6	1687.2				4	3	3				RNA-binding protein Raly
CDC16_HUMAN	Q13042	71655.6	human	15168.7	7473.7	3537.5				11	10	10				Cell division cycle protein 16 homolog
RT23_HUMAN	Q9Y3D9	21770.6	human	15152.8	7143.6	4076.9				4	3	4				28S ribosomal protein S23, mitochondrial
IWS1_HUMAN	Q96ST2	91954.6	human	15152.1	5990.8	971.5				17	17	10				Protein IWS1 homolog
TOM34_HUMAN	Q15785	34559.4	human	15089.4	11127.4	7440.8				5	5	5				Mitochondrial import receptor subunit TOM34
OGA_HUMAN	O60502	102915	human	15077.5	18132.4	103908				21	23	26				Protein O-GlcNAcase
CCD97_HUMAN	Q96F63	38946.6	human	14977.8	8771.6	8096.7				5	5	5				Coiled-coil domain-containing protein 97
BASI_HUMAN	P35613	42200.4	human	14966.3	12051.4	20147.9				5	5	5				Basigin
PABP2_HUMAN	Q86U42	32749.1	human	14941.7	7840.8	4649				4	3	3				Polyadenylate-binding protein 2
CE022_HUMAN	Q49AR2	49967.1	human	14884.7	8475.8	5557.2				6	5	6				UPF0489 protein C5orf22
P4R3B_HUMAN	Q5MIZ7	97458.2	human	14848.1	6844.4	4005.5				7	7	6				Serine/threonine-protein phosphatase 4 regulatory subunit 3B
PDC6I_HUMAN	Q8WUM4	96023.2	human	14768.8	10598.4	12422.1				21	20	21				Programmed cell death 6-interacting protein
RMP_HUMAN	O94763	59832.2	human	14735.7	15794.3	19238				9	9	9				Unconventional prefoldin RPB5 interactor 1
DHB12_HUMAN	Q53GQ0	34324.2	human	14683	9271	7545.4				4	4	4				Very-long-chain 3-oxoacyl-CoA reductase
SAE1_HUMAN	Q9UBE0	38449.8	human	14624.6	7859.5	43522				12	11	13				SUMO-activating enzyme subunit 1
PAF1_HUMAN	Q8N7H5	59975.7	human	14604	7173.2	454.2				10	9	3				RNA polymerase II-associated factor 1 homolog
RBBP5_HUMAN	Q15291	59152.6	human	14563.1	7455.4	4477.5				5	5	5				Retinoblastoma-binding protein 5
IPO4_HUMAN	Q8TEX9	118715	human	14497.9	11589	21191.2				14	14	14				Importin-4
MARE2_HUMAN	Q15555	37031.3	human	14494.7	8344	3714.1				6	6	5				Microtubule-associated protein RP/EB family member 2
ATPB_HUMAN	P06576	56559.9	human	14384.2	8001.6	20452.6				15	15	16				ATP synthase subunit beta, mitochondrial
NID2_HUMAN	Q14112	151254	human	14350.8	8020.3	6333.8				13	14	11				Nidogen-2
PUR6_HUMAN	P22234	47079.2	human	14277.4	13785.9	10964.7				7	7	7				Multifunctional protein ADE2
TSR1_HUMAN	Q2NL82	91810	human	14185.5	6611.6	747.1				10	10	3				Pre-rRNA-processing protein TSR1 homolog
TRM1_HUMAN	Q9NXH9	72234.1	human	14179.4	9692.8	8169.4				8	8	8				tRNA (guanine(26)-N(2))-dimethyltransferase
SAHH2_HUMAN	O43865	58951.4	human	14090.3	8393.5	5016.9				5	4	3				S-adenosylhomocysteine hydrolase-like protein 1
PRP31_HUMAN	Q8WWY3	55456	human	14071.4	8101.2	4408.6				8	8	8				U4/U6 small nuclear ribonucleoprotein Prp31
SYQ_HUMAN	P47897	87798.7	human	13996.7	12493.8	10054.5				15	16	16				Glutamine--tRNA ligase
MPPB_HUMAN	O75439	54366.1	human	13980.2	9513.5	9402.3				10	8	10				Mitochondrial-processing peptidase subunit beta
SDHB_HUMAN	P21912	31629.7	human	13948.5	9057.6	7709.2				5	5	5				Succinate dehydrogenase [ubiquinone] iron-sulfur subunit, mitochondrial
STIP1_HUMAN	P31948	62639.2	human	13896.1	9591.4	13235.9				10	10	10				Stress-induced-phosphoprotein 1
SMCA5_HUMAN	O60264	121905	human	13893.3	9200.3	5084.6				19	19	17				SWI/SNF-related matrix-associated actin-dependent regulator of chromatin subfamily A member 5
CDC27_HUMAN	P30260	91867.3	human	13755.9	7834	10053.6				10	10	8				Cell division cycle protein 27 homolog
ODO2_HUMAN	P36957	48755.3	human	13675.4	37303.6	196785				8	10	12				Dihydrolipoyllysine-residue succinyltransferase component of 2-oxoglutarate dehydrogenase complex, mitochondrial
FUBP3_HUMAN	Q96I24	61640.4	human	13650.6	9131.6	7594.2				11	11	11				Far upstream element-binding protein 3
G6PD_HUMAN	P11413	59256.8	human	13631.9	7141.8	5341.3				11	11	11				Glucose-6-phosphate 1-dehydrogenase
VIGLN_HUMAN	Q00341	141456	human	13602.5	9135.7	6545.6				22	22	22				Vigilin
QSPP_HUMAN	Q5T6V5	39028.5	human	13591.2	9046.7	6673.2				6	6	6				Queuosine salvage protein
HNRPR_HUMAN	O43390	70943.1	human	13584.6	5089.1	2129.4				9	9	7				Heterogeneous nuclear ribonucleoprotein R
HMGN5_HUMAN	P82970	31524.6	human	13550.9	11019.6	4092.1				6	6	4				High mobility group nucleosome-binding domain-containing protein 5
AP3D1_HUMAN	O14617	130158	human	13547.1	8902.6	3593.3				18	18	15				AP-3 complex subunit delta-1
WAC2A_HUMAN	Q641Q2	147184	human	13453.7	7352.6	5319.9				26	26	24				WASH complex subunit 2A
TBG1_HUMAN	P23258	51169.9	human	13401.1	8670	6179.8				8	8	8				Tubulin gamma-1 chain
DBNL_HUMAN	Q9UJU6	48207.3	human	13231.8	9411.4	11267.4				5	5	5				Drebrin-like protein
RL7A_HUMAN	P62424	29995.6	human	13205	11838.5	6730.4				4	4	4				60S ribosomal protein L7a
DNJA2_HUMAN	O60884	45745.6	human	13201.5	9737	6190.6				5	5	5				DnaJ homolog subfamily A member 2
MTA1_HUMAN	Q13330	80786.2	human	13127.1	8161.7	6811.8				14	13	13				Metastasis-associated protein MTA1
CPNS1_HUMAN	P04632	28315.7	human	13124	8658.6	7528				4	4	4				Calpain small subunit 1
EI2BG_HUMAN	Q9NR50	50240.3	human	13091	8368.3	7015.8				8	7	8				Translation initiation factor eIF-2B subunit gamma
UBXN1_HUMAN	Q04323	33325.3	human	13090.8	7331.6	5937.7				4	4	4				UBX domain-containing protein 1
PSA2_HUMAN	P25787	25898.6	human	13056.9	30069.5	824984			33667.3	6	8	11			7	Proteasome subunit alpha type-2
ACLY_HUMAN	P53396	120839	human	13037.6	11740.9	11827.8				19	19	20				ATP-citrate synthase
E2AK2_HUMAN	P19525	62094.3	human	13026.2	10142.9	9184.9				12	12	12				Interferon-induced, double-stranded RNA-activated protein kinase
NAA50_HUMAN	Q9GZZ1	19398.3	human	13022.4	7834.2	7489.6				6	6	6				N-alpha-acetyltransferase 50
AP3M1_HUMAN	Q9Y2T2	46939.2	human	12960.5	6993.4	3444.5				8	8	7				AP-3 complex subunit mu-1
HSP74_HUMAN	P34932	94330.9	human	12890.8	11030.7	39833.2				24	23	28				Heat shock 70 kDa protein 4
BAG2_HUMAN	O95816	23771.9	human	12848	10891.1	9124.3				3	3	3				BAG family molecular chaperone regulator 2
MARCS_HUMAN	P29966	31554.7	human	12818	10946.6	44957				7	7	7				Myristoylated alanine-rich C-kinase substrate
UCHL1_HUMAN	P09936	24824.3	human	12802.9	13255.1	11267.3				3	3	3				Ubiquitin carboxyl-terminal hydrolase isozyme L1
ARL1_HUMAN	P40616	20417.5	human	12792.2	7473.9	8339.7				4	4	4				ADP-ribosylation factor-like protein 1
WDR61_HUMAN	Q9GZS3	33580.6	human	12745.7	6874.5	7431.9				4	4	4				WD repeat-containing protein 61
IVD_HUMAN	P26440	46650.8	human	12669.9	9059	5876.5				7	7	7				Isovaleryl-CoA dehydrogenase, mitochondrial
PP6R1_HUMAN	Q9UPN7	96723.7	human	12623.4	7128.5	4216.8				10	10	9				Serine/threonine-protein phosphatase 6 regulatory subunit 1
RM48_HUMAN	Q96GC5	23934.8	human	12605.6	6382.6					3	3					39S ribosomal protein L48, mitochondrial
GNL1_HUMAN	P36915	68660.9	human	12490.7	9154.8	3858.6				7	7	4				Guanine nucleotide-binding protein-like 1
CLIC4_HUMAN	Q9Y696	28772.1	human	12462.3	7143.7	8751.8				5	5	5				Chloride intracellular channel protein 4
NSF_HUMAN	P46459	82594.3	human	12399	8284.5	8289.5				14	14	14				Vesicle-fusing ATPase
CHD4_HUMAN	Q14839	218005	human	12394.3	8363	3020.6				28	28	23				Chromodomain-helicase-DNA-binding protein 4
STRP1_HUMAN	Q5VSL9	95575.8	human	12362.7	5858	3881.9				12	11	9				Striatin-interacting protein 1
DJB11_HUMAN	Q9UBS4	40513.9	human	12338.4	6713.9	5564				6	6	6				DnaJ homolog subfamily B member 11
DNJC7_HUMAN	Q99615	56440.8	human	12304	7885.2	4202.4				9	9	9				DnaJ homolog subfamily C member 7
CCAR1_HUMAN	Q8IX12	132821	human	12155.4	6244.1	2361.8				12	10	8				Cell division cycle and apoptosis regulator protein 1
UBP15_HUMAN	Q9Y4E8	112419	human	12140	6826.4	4195.4				18	18	18				Ubiquitin carboxyl-terminal hydrolase 15
ARPC3_HUMAN	O15145	20546.7	human	12106.7	10645.5	9097				4	5	5				Actin-related protein 2/3 complex subunit 3
NMT1_HUMAN	P30419	56806.2	human	12102.5	6468.4	6867.7				7	7	7				Glycylpeptide N-tetradecanoyltransferase 1
E41L3_HUMAN	Q9Y2J2	120678	human	12090.1	8539.6	8165.2				18	18	18				Band 4.1-like protein 3
KPRB_HUMAN	O60256	40925.7	human	12051.2	7514.1	5986				7	7	6				Phosphoribosyl pyrophosphate synthase-associated protein 2
PGAM5_HUMAN	Q96HS1	32004.5	human	12042.3	8583.8	7901.5				6	6	6				Serine/threonine-protein phosphatase PGAM5, mitochondrial
FAF1_HUMAN	Q9UNN5	73954.1	human	12024.1	16270.2	66228.3				12	14	14				FAS-associated factor 1
PURA2_HUMAN	P30520	50097.4	human	12018.2	7768	6754.9				4	4	4				Adenylosuccinate synthetase isozyme 2
DRG2_HUMAN	P55039	40746.4	human	11960.8	7006.4	4497.1				7	6	6				Developmentally-regulated GTP-binding protein 2
RED_HUMAN	Q13123	65602.2	human	11950.4	7263.9	32026.1				6	6	6				Protein Red
CND2_HUMAN	Q15003	82563.2	human	11906.2	11775.4	15765.3				9	9	9				Condensin complex subunit 2
AL1B1_HUMAN	P30837	57206.3	human	11782.3	8412.3	6503.7				11	10	10				Aldehyde dehydrogenase X, mitochondrial
DCTN4_HUMAN	Q9UJW0	52337.1	human	11777.9	13498.9	15420				5	5	5				Dynactin subunit 4
PIMT_HUMAN	P22061	24636.4	human	11766.2	8125.9	5317.2				4	3	4				Protein-L-isoaspartate(D-aspartate) O-methyltransferase
PMVK_HUMAN	Q15126	21994.9	human	11765.1	7801.2	6751.5				6	5	6				Phosphomevalonate kinase
UCHL5_HUMAN	Q9Y5K5	37606.9	human	11753.3	5925.3	3292.7				8	8	7				Ubiquitin carboxyl-terminal hydrolase isozyme L5
HNRL2_HUMAN	Q1KMD3	85104.7	human	11739.7	5019.5	2637.5				12	12	12				Heterogeneous nuclear ribonucleoprotein U-like protein 2
ABCF1_HUMAN	Q8NE71	95925.7	human	11686.4	5639					12	12					ATP-binding cassette sub-family F member 1
TENA_HUMAN	P24821	240853	human	11666.6	12505.5	29022.2				29	32	33				Tenascin
RCN2_HUMAN	Q14257	36876.4	human	11666.6	8380.6	1376.1				8	8	3				Reticulocalbin-2
HCD2_HUMAN	Q99714	26923.1	human	11666.4	8569.9	10865.5				6	5	6				3-hydroxyacyl-CoA dehydrogenase type-2
XPOT_HUMAN	O43592	109964	human	11641.7	7668.6	9896.8				12	12	12				Exportin-T
UBL4A_HUMAN	P11441	17776.5	human	11637	13156.1	18557.2				3	3	3				Ubiquitin-like protein 4A
RBGPR_HUMAN	Q9H2M9	155985	human	11606.7	9574.5	12678.9				20	20	20				Rab3 GTPase-activating protein non-catalytic subunit
UXT_HUMAN	Q9UBK9	18246.1	human	11553.3	12384.6	15766.3				3	3	3				Protein UXT
CAZA2_HUMAN	P47755	32949.1	human	11527.5	8584.1	13976.2				5	5	5				F-actin-capping protein subunit alpha-2
GCP60_HUMAN	Q9H3P7	60593.4	human	11514.5	7778.9	9359.4				7	7	7				Golgi resident protein GCP60
PDIA3_HUMAN	P30101	56782.4	human	11472.4	6801.7	4883.4				11	11	11				Protein disulfide-isomerase A3
TNPO1_HUMAN	Q92973	102355	human	11444.9	7698.2	37459.9				14	14	15				Transportin-1
CISY_HUMAN	O75390	51712.4	human	11440.4	8357	5831.5				5	5	5				Citrate synthase, mitochondrial
P4HA2_HUMAN	O15460	60901.9	human	11425.2	7930.9	6497.6				8	8	8				Prolyl 4-hydroxylase subunit alpha-2
MIER1_HUMAN	Q8N108	57983.2	human	11400.9	5814.8	1795.8				6	6	5				Mesoderm induction early response protein 1
MP2K1_HUMAN	Q02750	43439	human	11383.4	7089.6					3	3					Dual specificity mitogen-activated protein kinase kinase 1
GMDS_HUMAN	O60547	41949.7	human	11339.7	7827.9	6690.9				5	5	5				GDP-mannose 4,6 dehydratase
TM10C_HUMAN	Q7L0Y3	47346.9	human	11315.3	7282.6	3064.5				9	9	7				tRNA methyltransferase 10 homolog C
IPO5_HUMAN	O00410	123630	human	11291.8	8053.2	63682.3				23	21	29				Importin-5
LA_HUMAN	P05455	46837.1	human	11288.1	6632.6	4867.9				8	8	6				Lupus La protein
SIR1_HUMAN	Q96EB6	81681	human	11253.3	5976.4	1703.4				12	12	10				NAD-dependent protein deacetylase sirtuin-1
GRHPR_HUMAN	Q9UBQ7	35668.3	human	11240.1	6357.6	5472.9				4	4	4				Glyoxylate reductase/hydroxypyruvate reductase
PFKAM_HUMAN	P08237	85182.5	human	11224	7432.6	5546.2				9	9	9				ATP-dependent 6-phosphofructokinase, muscle type
SRP72_HUMAN	O76094	74606.2	human	11161.5	6843.9	1737.1				11	11	9				Signal recognition particle subunit SRP72
PSF3_HUMAN	Q9BRX5	24534.6	human	11116.4	6901.6	5107.2				4	4	4				DNA replication complex GINS protein PSF3
AP2B1_HUMAN	P63010	104553	human	11095.1	8756.3	17035.7				16	15	16				AP-2 complex subunit beta
GT251_HUMAN	Q8NBJ5	71636.1	human	11079	5688.5	1793.5				9	9	8				Procollagen galactosyltransferase 1
FKB15_HUMAN	Q5T1M5	133630	human	10943	5980.7	6591.7				21	20	20				FK506-binding protein 15
THIL_HUMAN	P24752	45199.6	human	10900	6326.7	3855.2				7	7	6				Acetyl-CoA acetyltransferase, mitochondrial
GSTO1_HUMAN	P78417	27565.8	human	10892.1	8316.1	7683.5				3	3	3				Glutathione S-transferase omega-1
ILF2_HUMAN	Q12905	43062.1	human	10886.4	7698.6	3981.9				6	7	5				Interleukin enhancer-binding factor 2
DHB4_HUMAN	P51659	79686.4	human	10760	5870.4	4906.3				11	11	11				Peroxisomal multifunctional enzyme type 2
EHD4_HUMAN	Q9H223	61175.1	human	10733.3	7540.3	5706.2				9	9	9				EH domain-containing protein 4
IF4H_HUMAN	Q15056	27385.1	human	10726.3	7197.6	2662.9				3	3	3				Eukaryotic translation initiation factor 4H
LYPA1_HUMAN	O75608	24669.6	human	10675.5	6331.7	5027.1				3	3	3				Acyl-protein thioesterase 1
CDN2A_HUMAN	P42771	16532.6	human	10581.3	5670.3	4724.5	1891.6		1846.2	4	4	3	3		3	Cyclin-dependent kinase inhibitor 2A
RIR1_HUMAN	P23921	90070.1	human	10575.4	6891.3	6920.6				12	11	12				Ribonucleoside-diphosphate reductase large subunit
TF3C3_HUMAN	Q9Y5Q9	101272	human	10541.3	5154.6	2152.4				12	11	10				General transcription factor 3C polypeptide 3
STK26_HUMAN	Q9P289	46528.8	human	10461.6	7365.3	6501.9				9	9	9				Serine/threonine-protein kinase 26
CLU_HUMAN	O75153	146670	human	10437.3	8540.8	10522.1				20	19	21				Clustered mitochondria protein homolog
FKBP8_HUMAN	Q14318	44561.7	human	10322.8	5140.6	3352.6				5	5	5				Peptidyl-prolyl cis-trans isomerase FKBP8
SF3A3_HUMAN	Q12874	58848.9	human	10304.9	5029.8	6186.5				8	8	8				Splicing factor 3A subunit 3
HPBP1_HUMAN	Q9NZL4	39302.8	human	10274.3	7141	7768.1				5	5	5				Hsp70-binding protein 1
BABA1_HUMAN	Q9NWV8	36560	human	10245.7	5083	13301.1				4	4	5				BRISC and BRCA1-A complex member 1
CORO7_HUMAN	P57737	100605	human	10238.6	6939.5	4568.1				10	10	9				Coronin-7
AP2A1_HUMAN	O95782	107546	human	10171.5	7010.1	7441				11	11	11				AP-2 complex subunit alpha-1
AHSA1_HUMAN	O95433	38274.3	human	10157.6	5808.1	4069.9				5	5	5				Activator of 90 kDa heat shock protein ATPase homolog 1
EPS15_HUMAN	P42566	98655.7	human	10154	10102.1	31622				25	27	28				Epidermal growth factor receptor substrate 15
OGFR_HUMAN	Q9NZT2	73324.7	human	10152.1	8605.2	12268.4				11	11	11				Opioid growth factor receptor
ARI1_HUMAN	Q9Y4X5	64117.8	human	10126.7	5511.9	1029.6				4	4	4				E3 ubiquitin-protein ligase ARIH1
RINI_HUMAN	P13489	49973.5	human	10103	5872.9	4278.7				4	4	4				Ribonuclease inhibitor
ARHG1_HUMAN	Q92888	102435	human	10074.3	7239.3	4573.3				13	13	12				Rho guanine nucleotide exchange factor 1
CDK2_HUMAN	P24941	33929.5	human	10049.3	5186.8	6423.7				7	7	7				Cyclin-dependent kinase 2
KLC1_HUMAN	Q07866	65309.5	human	10032.7	9241.6	13697.3				13	13	13				Kinesin light chain 1
BYST_HUMAN	Q13895	49601.3	human	10027	6296.3	4007				8	8	7				Bystin
NUDC_HUMAN	Q9Y266	38242.9	human	10017.4	7551.9	6957.9				5	5	5				Nuclear migration protein nudC
UBA5_HUMAN	Q9GZZ9	44863.1	human	9975.1	5441.8	7122.5				5	5	4				Ubiquitin-like modifier-activating enzyme 5
WDHD1_HUMAN	O75717	125967	human	9932.9	6216.7	2937.8				17	16	15				WD repeat and HMG-box DNA-binding protein 1
IQGA1_HUMAN	P46940	189252	human	9919.9	7455.6	8353.1				30	30	30				Ras GTPase-activating-like protein IQGAP1
GPN3_HUMAN	Q9UHW5	32761.3	human	9887	3226.8					3	3					GPN-loop GTPase 3
RU17_HUMAN	P08621	51556.7	human	9859.2	4960.9	1048.8				6	6	3				U1 small nuclear ribonucleoprotein 70 kDa
HDHD5_HUMAN	Q9BXW7	46321.4	human	9855.4	6740.4	4645.8				6	6	6				Haloacid dehalogenase-like hydrolase domain-containing 5
P20D2_HUMAN	Q8IYS1	47776.2	human	9835.7	7362.4	6178.6				4	4	4				Peptidase M20 domain-containing protein 2
ISY1_HUMAN	Q9ULR0	32992.2	human	9828.1	5812.5	3197.5				4	4	4				Pre-mRNA-splicing factor ISY1 homolog
PPIE_HUMAN	Q9UNP9	33430.8	human	9763.6	5228.5	2669.2				4	4	3				Peptidyl-prolyl cis-trans isomerase E
CAH8_HUMAN	P35219	32973.2	human	9756.5	6812.1	6652				4	4	4				Carbonic anhydrase-related protein
IDHP_HUMAN	P48735	50909.3	human	9696.4	6366	8162				8	9	9				Isocitrate dehydrogenase [NADP], mitochondrial
ELP1_HUMAN	O95163	150254	human	9695.8	6379.8	8458.3				21	20	20				Elongator complex protein 1
GCN1_HUMAN	Q92616	292758	human	9504.6	8298	8900.7				52	51	53				eIF-2-alpha kinase activator GCN1
ASPC1_HUMAN	Q9BZE9	60183.1	human	9454.7	4780.8	3402.9				5	5	5				Tether containing UBX domain for GLUT4
IF4A2_HUMAN	Q14240	46402.3	human	9448.9	6658.7	6818.5				4	4	4				Eukaryotic initiation factor 4A-II
ASPH_HUMAN	Q12797	85862.6	human	9430.1	4356.8	2409.1				9	8	8				Aspartyl/asparaginyl beta-hydroxylase
PAPS2_HUMAN	O95340	69500.7	human	9385.8	5644.2	3118.5				6	6	6				Bifunctional 3'-phosphoadenosine 5'-phosphosulfate synthase 2
MCA3_HUMAN	O43324	19810.6	human	9376.1	8348.9	8885.7				3	3	3				Eukaryotic translation elongation factor 1 epsilon-1
DCAF8_HUMAN	Q5TAQ9	66852.2	human	9371	5483.4	2718.3				7	6	5				DDB1- and CUL4-associated factor 8
WRIP1_HUMAN	Q96S55	72133	human	9350.8	5426	4387.4				8	8	7				ATPase WRNIP1
FAIM1_HUMAN	Q9NVQ4	20214.9	human	9331.2	5651.7	4210.3				3	3	3				Fas apoptotic inhibitory molecule 1
RU2A_HUMAN	P09661	28415.6	human	9317.5	4761.3	3028.4				4	4	4				U2 small nuclear ribonucleoprotein A'
PEX14_HUMAN	O75381	41236.6	human	9272.2	2616	816.8				5	4	3				Peroxisomal membrane protein PEX14
PP1R8_HUMAN	Q12972	38478.8	human	9250.9	6243.1	4449.8				3	3	3				Nuclear inhibitor of protein phosphatase 1
DPYL5_HUMAN	Q9BPU6	61421.3	human	9248.7	5272	3779.7				8	8	7				Dihydropyrimidinase-related protein 5
FNBP4_HUMAN	Q8N3X1	110266	human	9240.9	4009.9	1770.1				8	8	6				Formin-binding protein 4
DNJB6_HUMAN	O75190	36087	human	9207	7200.6	9423.3	14342.2	9244.2	49333.3	4	4	4	5	5	5	DnaJ homolog subfamily B member 6
P66B_HUMAN	Q8WXI9	65260.7	human	9198.6	6514.4	2585.7				8	8	4				Transcriptional repressor p66-beta
LANC1_HUMAN	O43813	45283.1	human	9197.6	6941.3	6215.5				4	4	4				Glutathione S-transferase LANCL1
WDR82_HUMAN	Q6UXN9	35079	human	9144.7	5606.9	4284.3				4	4	4				WD repeat-containing protein 82
OLA1_HUMAN	Q9NTK5	44743.6	human	9130.8	4977.7	2491.9				5	5	5				Obg-like ATPase 1
LNP_HUMAN	Q9C0E8	47739.9	human	9109	4655.1	4329.7				5	5	5				Endoplasmic reticulum junction formation protein lunapark
SMN_HUMAN	Q16637	31848.7	human	9108.9	7500					3	3					Survival motor neuron protein
RNZ2_HUMAN	Q9BQ52	92219	human	9106.3	5805.4	3921.5				9	9	8				Zinc phosphodiesterase ELAC protein 2
KS6A3_HUMAN	P51812	83736	human	9093.3	6227.9	5144.9				11	10	10				Ribosomal protein S6 kinase alpha-3
SRPK1_HUMAN	Q96SB4	74324.8	human	9078.2	5629.6	4184.9				8	8	8				SRSF protein kinase 1
NRBP_HUMAN	Q9UHY1	59844.7	human	9074.3	5426.7	16066.1				5	5	7				Nuclear receptor-binding protein
CPNE3_HUMAN	O75131	60130.6	human	9043.2	6552.3	6414.5				6	6	6				Copine-3
CND1_HUMAN	Q15021	157182	human	9042.3	8737.2	12785.4				24	24	24				Condensin complex subunit 1
PRP4_HUMAN	O43172	58449.2	human	9002.1	5094.8	3322.2				5	5	5				U4/U6 small nuclear ribonucleoprotein Prp4
EMD_HUMAN	P50402	28993.8	human	8977.6	6369.5	6130.2				3	3	3				Emerin
IF2B3_HUMAN	O00425	63705	human	8967.2	6218.9	4213.1				7	7	7				Insulin-like growth factor 2 mRNA-binding protein 3
IPO9_HUMAN	Q96P70	115963	human	8956.3	6919.1	13125.4				17	16	17				Importin-9
HS74L_HUMAN	O95757	94512.5	human	8880.8	5907.6	6861.1				11	10	11				Heat shock 70 kDa protein 4L
ARP3_HUMAN	P61158	47371.2	human	8822.1	6507.2	6514				6	6	6				Actin-related protein 3
SYAP1_HUMAN	Q96A49	39933.4	human	8766.1	7621.1	90462.3				10	11	16				Synapse-associated protein 1
pVI	L0R819	11249.8	human	8754.3	8478.2	10811				4	4	4				ASNSD1 upstream open reading frame protein
CSK_HUMAN	P41240	50704.3	human	8724.6	5483.2	3450.7				6	5	6				Tyrosine-protein kinase CSK
RPA2_HUMAN	Q9H9Y6	128229	human	8713.8	4932.3	1551.9				10	10	9				DNA-directed RNA polymerase I subunit RPA2
UBR4_HUMAN	Q5T4S7	573841	human	8666.3	7236.5	4385.7				50	50	48				E3 ubiquitin-protein ligase UBR4
RB3GP_HUMAN	Q15042	110524	human	8643.3	7193	8914.5				15	15	16				Rab3 GTPase-activating protein catalytic subunit
S30BP_HUMAN	Q9UHR5	33870.4	human	8638.9	4258.6	3178.9				4	3	3				SAP30-binding protein
SCO2_HUMAN	O43819	29809.9	human	8630.2	5611.6	3161.1				4	4	4				Protein SCO2 homolog, mitochondrial
RT26_HUMAN	Q9BYN8	24211.7	human	8618.3	6876.3	3441.5				4	4	4				28S ribosomal protein S26, mitochondrial
PABP1_HUMAN	P11940	70670.8	human	8614.1	2243.3	2535.2				9	7	7				Polyadenylate-binding protein 1
PUR9_HUMAN	P31939	64615.9	human	8609.9	6567.5	4789.9				9	10	10				Bifunctional purine biosynthesis protein ATIC
LMNB2_HUMAN	Q03252	69948.4	human	8605.8	7114	47675.7				18	19	22				Lamin-B2
PSB3_HUMAN	P49720	22948.9	human	8570.9	23895.7	841660				3	6	10				Proteasome subunit beta type-3
ARP2_HUMAN	P61160	44760.8	human	8557	4985.5	5766.7				4	5	5				Actin-related protein 2
THTR_HUMAN	Q16762	33428.9	human	8519.7	5655.3	7543.4				4	4	4				Thiosulfate sulfurtransferase
SMRC1_HUMAN	Q92922	122867	human	8517.4	6650.5	4114.2				11	11	10				SWI/SNF complex subunit SMARCC1
NDRG1_HUMAN	Q92597	42835.4	human	8501	4719.8	3903.3				3	3	3				Protein NDRG1
VP26A_HUMAN	O75436	38169.9	human	8484.2	5844.9	5537.7				6	6	6				Vacuolar protein sorting-associated protein 26A
LAP2B_HUMAN	P42167	50670.2	human	8386.9	5432.6	4026.2				5	5	5				Lamina-associated polypeptide 2, isoforms beta/gamma
GMFB_HUMAN	P60983	16713.2	human	8368.8	4714.7	3184.4				4	4	4				Glia maturation factor beta
PRPF3_HUMAN	O43395	77528.9	human	8345.8	4225.2	1036.8				9	9	4				U4/U6 small nuclear ribonucleoprotein Prp3
UHRF1_HUMAN	Q96T88	89813.9	human	8338.7	4893.5	1923				13	13	11				E3 ubiquitin-protein ligase UHRF1
CIP4_HUMAN	Q15642	68352.3	human	8336.1	8866.9	13092.5				7	7	8				Cdc42-interacting protein 4
SMCA4_HUMAN	P51532	184646	human	8310	6209.7	2909.9				13	13	12				Transcription activator BRG1
DAG1_HUMAN	Q14118	97441.5	human	8303.9	6159.7	5518				5	5	5				Dystroglycan
CAF1B_HUMAN	Q13112	61492.5	human	8303	5133.9	3314.3				5	5	5				Chromatin assembly factor 1 subunit B
SNF5_HUMAN	Q12824	44141.2	human	8204	5873.8	3773.8				5	5	4				SWI/SNF-related matrix-associated actin-dependent regulator of chromatin subfamily B member 1
ROA2_HUMAN	P22626	37429.7	human	8188.3	4915.8	1828.2				8	8	5				Heterogeneous nuclear ribonucleoproteins A2/B1
WASC4_HUMAN	Q2M389	136403	human	8169.8	4459.7	4181.1				19	19	19				WASH complex subunit 4
UN45A_HUMAN	Q9H3U1	103077	human	8125	5174.4	6992.3				15	15	15				Protein unc-45 homolog A
EPB41_HUMAN	P11171	97016.9	human	8119.5	5981.1	7248.1				10	11	11				Protein 4.1
IRS4_HUMAN	O14654	133768	human	8095.6	7187.9	7594				12	12	12				Insulin receptor substrate 4
VAMP2_HUMAN	P63027	12662.7	human	8092.9	14570.6	30413.2				4	5	5				Vesicle-associated membrane protein 2
ARK72_HUMAN	O43488	39589	human	8065.6	4191	4340.8				3	3	3				Aflatoxin B1 aldehyde reductase member 2
RTF1_HUMAN	Q92541	80313.5	human	8036.3	4431.2					8	8					RNA polymerase-associated protein RTF1 homolog
RL3_HUMAN	P39023	46108.9	human	7993.2	5989.8	6564.3				3	3	3				60S ribosomal protein L3
PLD3_HUMAN	Q8IV08	54705.3	human	7992.8	4510.7	4347.2				3	3	3				5'-3' exonuclease PLD3
SNX27_HUMAN	Q96L92	61265.2	human	7923.6	4817.2	4308.8				5	5	5				Sorting nexin-27
CRK_HUMAN	P46108	33830.7	human	7887	6319.5	3531.8				5	5	5				Adapter molecule crk
AIMP1_HUMAN	Q12904	34352.7	human	7883.7	8827.4	8024.4				3	3	3				Aminoacyl tRNA synthase complex-interacting multifunctional protein 1
TIAR_HUMAN	Q01085	41590.7	human	7852.6	3449.2	1398.2				5	5	4				Nucleolysin TIAR
KCMF1_HUMAN	Q9P0J7	41945.4	human	7843.3	6986.8	2736.4				3	3	3				E3 ubiquitin-protein ligase KCMF1
DIAP1_HUMAN	O60610	141347	human	7826.9	7035.4	13672.1				23	21	24				Protein diaphanous homolog 1
CPSF3_HUMAN	Q9UKF6	77486	human	7816.6	7546.3	13291.2				7	7	7				Cleavage and polyadenylation specificity factor subunit 3
RECQ1_HUMAN	P46063	73457.3	human	7765.7	4872.3	4587.5				7	7	6				ATP-dependent DNA helicase Q1
GEMI_HUMAN	O75496	23565.1	human	7710.9						3						Geminin
SF3A1_HUMAN	Q15459	88886.2	human	7706	3201.7	4824.7				15	13	15				Splicing factor 3A subunit 1
STAT1_HUMAN	P42224	87334.8	human	7684.7	4697.5	3685.8				12	12	10				Signal transducer and activator of transcription 1-alpha/beta
ALDOA_HUMAN	P04075	39420	human	7656.4	6623.7	3346				4	4	4				Fructose-bisphosphate aldolase A
PUR1_HUMAN	Q06203	57399	human	7641.4	3007.6	6517				5	6	6				Amidophosphoribosyltransferase
MFAP1_HUMAN	P55081	51958.4	human	7617.1	1803.4					7	7					Microfibrillar-associated protein 1
PININ_HUMAN	Q9H307	81627.7	human	7550.7	6692.6					5	5					Pinin
CEP43_HUMAN	O95684	43064.9	human	7499.3	3052.1	1964.4				6	6	6				Centrosomal protein 43
CDC23_HUMAN	Q9UJX2	68834.2	human	7476.6	3994.2	1526.7				8	8	5				Cell division cycle protein 23 homolog
ARP10_HUMAN	Q9NZ32	46307	human	7388.4	8014.7	10577.1				5	5	5				Actin-related protein 10
PANK4_HUMAN	Q9NVE7	85990.9	human	7383.6	4185.9	2829.5				6	6	6				4'-phosphopantetheine phosphatase
PRPS2_HUMAN	P11908	34769.1	human	7372.7	4400.7	2656				4	3	3				Ribose-phosphate pyrophosphokinase 2
PRP39_HUMAN	Q86UA1	78429.7	human	7338.2	3799.5	5948.5				9	9	9				Pre-mRNA-processing factor 39
SRP54_HUMAN	P61011	55704.7	human	7275.1	3976.9	1605.1				8	8	7				Signal recognition particle 54 kDa protein
DC1L1_HUMAN	Q9Y6G9	56579.1	human	7271.6	7830.9	15635.5				9	9	10				Cytoplasmic dynein 1 light intermediate chain 1
ECHD1_HUMAN	Q9NTX5	33698	human	7254.3	6731.4	9310.4				6	6	6				Ethylmalonyl-CoA decarboxylase
SIN3A_HUMAN	Q96ST3	145175	human	7237.9	4417.7	1970.8				13	13	10				Paired amphipathic helix protein Sin3a
ATG3_HUMAN	Q9NT62	35864.4	human	7216.3	4452.5	2639.9				4	4	3				Ubiquitin-like-conjugating enzyme ATG3
CUL2_HUMAN	Q13617	86983	human	7200.3	4349.9	3684.9				9	9	9				Cullin-2
CPSF7_HUMAN	Q8N684	52050.1	human	7187.6	4269.6	2943				6	6	6				Cleavage and polyadenylation specificity factor subunit 7
GRSF1_HUMAN	Q12849	53126.3	human	7184.9	3546.7	1965.1				4	4	4				G-rich sequence factor 1
UGDH_HUMAN	O60701	55024.1	human	7152.7	4759.1	2984.3				5	4	5				UDP-glucose 6-dehydrogenase
KCC2D_HUMAN	Q13557	56369.4	human	7112.9	7191.9	9581.9				9	9	9				Calcium/calmodulin-dependent protein kinase type II subunit delta
RANB3_HUMAN	Q9H6Z4	60209.9	human	7101.8	6231.9	24379.9				5	6	6				Ran-binding protein 3
LEO1_HUMAN	Q8WVC0	75404.1	human	7077.9	3932.3					6	6					RNA polymerase-associated protein LEO1
DIM1_HUMAN	Q9UNQ2	35236.4	human	7077.9	5041.5	2941.6				3	3	3				Probable dimethyladenosine transferase
PSB2_HUMAN	P49721	22836.3	human	7037	25035.8	675619	1365.3		46197.3	5	8	12	3		4	Proteasome subunit beta type-2
TPPC5_HUMAN	Q8IUR0	20783	human	6966.7	5157.6	5983.6				3	3	3				Trafficking protein particle complex subunit 5
HSPB1_HUMAN	P04792	22782.5	human	6957.7	3955.8	2117				3	3	3				Heat shock protein beta-1
UTP11_HUMAN	Q9Y3A2	30446.5	human	6955.2	6326	4819.4				5	5	5				Probable U3 small nucleolar RNA-associated protein 11
SUCB1_HUMAN	Q9P2R7	50317.3	human	6922.5	4194.5	4225.3				4	4	4				Succinate--CoA ligase [ADP-forming] subunit beta, mitochondrial
DDX47_HUMAN	Q9H0S4	50646.5	human	6888.1	5306.9	2962.7				6	6	6				Probable ATP-dependent RNA helicase DDX47
WASC5_HUMAN	Q12768	134286	human	6875.1	3269.9	3824				24	22	23				WASH complex subunit 5
FKBP5_HUMAN	Q13451	51212.2	human	6867.1	4221.8	4408.6				9	9	9				Peptidyl-prolyl cis-trans isomerase FKBP5
VTA1_HUMAN	Q9NP79	33879.2	human	6852.6	3329.6	3391.5				3	3	3				Vacuolar protein sorting-associated protein VTA1 homolog
ERF1_HUMAN	P62495	49030.9	human	6844.3	3349.9	3629				7	6	6				Eukaryotic peptide chain release factor subunit 1
TBCD_HUMAN	Q9BTW9	132600	human	6780.4	5447.3	5710.2				15	15	15				Tubulin-specific chaperone D
EI2BD_HUMAN	Q9UI10	57557.2	human	6759.2	4861	3445				5	5	5				Translation initiation factor eIF-2B subunit delta
PPIL4_HUMAN	Q8WUA2	57225.1	human	6752.1	4553.5					4	4					Peptidyl-prolyl cis-trans isomerase-like 4
LAMC1_HUMAN	P11047	177603	human	6750.1	20695.4	23200.1				25	28	28				Laminin subunit gamma-1
RPAP3_HUMAN	Q9H6T3	75718.6	human	6746.7	7546.6	6496.7				14	15	15				RNA polymerase II-associated protein 3
NCBP1_HUMAN	Q09161	91839.4	human	6709.7	3431.9	3818.4				7	7	6				Nuclear cap-binding protein subunit 1
ZN326_HUMAN	Q5BKZ1	65653.8	human	6672.2	2931.8	935.2				6	6	4				DBIRD complex subunit ZNF326
ULA1_HUMAN	Q13564	60246.3	human	6649.3	4779.5	8512				8	8	9				NEDD8-activating enzyme E1 regulatory subunit
NLE1_HUMAN	Q9NVX2	53320.3	human	6645.1	6479.2	7424.5				5	5	5				Notchless protein homolog 1
MYG1_HUMAN	Q9HB07	42477.3	human	6644.3	4758.1	5663.4				5	6	6				MYG1 exonuclease
TF3C2_HUMAN	Q8WUA4	100680	human	6586.5	3515.3	1676.7				5	5	5				General transcription factor 3C polypeptide 2
XRCC4_HUMAN	Q13426	38286.7	human	6584.8	6802.8	11379.9				8	7	8				DNA repair protein XRCC4
RAB18_HUMAN	Q9NP72	22977.1	human	6579.7	4599.4	2988.7				3	3	3				Ras-related protein Rab-18
XPO7_HUMAN	Q9UIA9	123907	human	6554.1	4917.1	7434.7				13	13	13				Exportin-7
GPX4_HUMAN	P36969	22174.7	human	6544.7	5655.6	9119.4				3	4	4				Phospholipid hydroperoxide glutathione peroxidase
RL24_HUMAN	P83731	17779	human	6525.1	4659.2	4651.6				3	3	3				60S ribosomal protein L24
MEMO1_HUMAN	Q9Y316	33733.2	human	6519						3						Protein MEMO1
KAD4_HUMAN	P27144	25268	human	6492.7	4063.3	2712.4				4	4	3				Adenylate kinase 4, mitochondrial
RPTOR_HUMAN	Q8N122	149038	human	6491.3	4449	3122				8	8	8				Regulatory-associated protein of mTOR
AP2M1_HUMAN	Q96CW1	49654.7	human	6480.3	5306.5	5569.4				4	4	4				AP-2 complex subunit mu
TRM1L_HUMAN	Q7Z2T5	81747.3	human	6476.3	4582.6	4452.1				11	11	11				TRMT1-like protein
LYPL1_HUMAN	Q5VWZ2	26316.4	human	6440.4	3484.1	3244				4	4	4				Lysophospholipase-like protein 1
SEC63_HUMAN	Q9UGP8	87996.9	human	6405.4	2745.4	419.4				5	5	3				Translocation protein SEC63 homolog
SPF27_HUMAN	O75934	26131.4	human	6404	4235.3	2504.6				3	3	3				Pre-mRNA-splicing factor SPF27
APC7_HUMAN	Q9UJX3	66855.5	human	6396.8	3245.4	886.7				7	7	6				Anaphase-promoting complex subunit 7
ACSL3_HUMAN	O95573	80420.1	human	6392.9	4046.5	2767.4				7	7	7				Long-chain-fatty-acid--CoA ligase 3
MBD2_HUMAN	Q9UBB5	43254.5	human	6387.7	5419.9	4610.7				4	4	4				Methyl-CpG-binding domain protein 2
RETR3_HUMAN	Q86VR2	51396.2	human	6387.4	5204.4	8512.8				4	4	4				Reticulophagy regulator 3
SC22B_HUMAN	O75396	24593.3	human	6381	5402.4	4748.2				4	4	4				Vesicle-trafficking protein SEC22b
PLAP_HUMAN	Q9Y263	87157.1	human	6354.6	5990	3336.6				6	6	6				Phospholipase A-2-activating protein
GNA11_HUMAN	P29992	42123.3	human	6348.6	3994.9	3550.7				4	4	4				Guanine nucleotide-binding protein subunit alpha-11
WDR43_HUMAN	Q15061	74890.6	human	6331.6	2313.6					4	3					WD repeat-containing protein 43
RPC3_HUMAN	Q9BUI4	60611.6	human	6323.3	3028.5	2034.9				6	6	6				DNA-directed RNA polymerase III subunit RPC3
KLC2_HUMAN	Q9H0B6	68934.6	human	6315.6	5710.4	6881.4				6	6	6				Kinesin light chain 2
LIS1_HUMAN	P43034	46638	human	6297.2	4111.9	4998.5				4	4	4				Platelet-activating factor acetylhydrolase IB subunit beta
CPSF2_HUMAN	Q9P2I0	88486.8	human	6252.4	4042.7	6336.5				8	9	9				Cleavage and polyadenylation specificity factor subunit 2
TFAM_HUMAN	Q00059	29096.6	human	6226.3	3265.9					4	4					Transcription factor A, mitochondrial
CBPE_HUMAN	P16870	53150.7	human	6193	2704.7	2733.6				6	6	5				Carboxypeptidase E
FLNB_HUMAN	O75369	278164	human	6190.1	5419.4	5378				26	27	30				Filamin-B
HS105_HUMAN	Q92598	96864.9	human	6186.6	3458.8	12655.4				15	14	17				Heat shock protein 105 kDa
BAP31_HUMAN	P51572	27991.6	human	6178	11883.2	103788				5	6	6				B-cell receptor-associated protein 31
UBP11_HUMAN	P51784	109817	human	6158.9	4001.9	6197				12	12	12				Ubiquitin carboxyl-terminal hydrolase 11
CERT_HUMAN	Q9Y5P4	70834.9	human	6154.7	4346	5400.5				8	8	8				Ceramide transfer protein
ACACA_HUMAN	Q13085	265554	human	6149.3	5360.3	7325.5				29	30	31				Acetyl-CoA carboxylase 1
GSH0_HUMAN	P48507	30727	human	6136.8	3142.9	2852.1				3	3	3				Glutamate--cysteine ligase regulatory subunit
NUP88_HUMAN	Q99567	83541.9	human	6119.9	3385.7	1922.8				6	6	5				Nuclear pore complex protein Nup88
PUR4_HUMAN	O15067	144734	human	6105.3	4166.1	2677				8	8	8				Phosphoribosylformylglycinamidine synthase
EIF2A_HUMAN	Q9BY44	64990.1	human	6080.2	3405.2	937.8				4	4	3				Eukaryotic translation initiation factor 2A
COEA1_HUMAN	Q05707	193515	human	6044.8	3068.2	4456.3				17	16	17				Collagen alpha-1(XIV) chain
SRSF9_HUMAN	Q13242	25542.2	human	6031.9	4992.3	1335.2				3	3	3				Serine/arginine-rich splicing factor 9
RAB14_HUMAN	P61106	23896.9	human	5971	2875	2773.2				6	6	5				Ras-related protein Rab-14
UBE2H_HUMAN	P62256	20655.2	human	5958.3	3694.7	2068.7				3	3	3				Ubiquitin-conjugating enzyme E2 H
SMRC2_HUMAN	Q8TAQ2	132879	human	5950	4667.1	3576.6				6	6	6				SWI/SNF complex subunit SMARCC2
HDAC2_HUMAN	Q92769	55364.2	human	5920.6		2595.1				3		3				Histone deacetylase 2
WDR70_HUMAN	Q9NW82	73201.1	human	5884.1	3587.1	1788.9				7	7	7				WD repeat-containing protein 70
RPAP2_HUMAN	Q8IXW5	69508.8	human	5865	3229.1	1148.7				5	5	5				Putative RNA polymerase II subunit B1 CTD phosphatase RPAP2
XPP1_HUMAN	Q9NQW7	69917.8	human	5863.7	2832.6	1164.5				9	8	6				Xaa-Pro aminopeptidase 1
OTUL_HUMAN	Q96BN8	40262.9	human	5862.9	4110.6	2814.5				3	3	3				Ubiquitin thioesterase otulin
FDFT_HUMAN	P37268	48115.3	human	5852.9	5421.2	4470.1				5	6	6				Squalene synthase
MINY3_HUMAN	Q9H8M7	49724.6	human	5847.3	3896	6223				3	3	3				Ubiquitin carboxyl-terminal hydrolase MINDY-3
WASF2_HUMAN	Q9Y6W5	54284	human	5837.6	6615.6	11347.2				6	6	6				Wiskott-Aldrich syndrome protein family member 2
NUDT5_HUMAN	Q9UKK9	24327.6	human	5833	4704.6	18256.8				6	6	7				ADP-sugar pyrophosphatase
KCC1A_HUMAN	Q14012	41337.1	human	5815	3979.9	6079.8				7	7	7				Calcium/calmodulin-dependent protein kinase type 1
SMU1_HUMAN	Q2TAY7	57543.9	human	5814.6	3693.5	3636.6				4	4	4				WD40 repeat-containing protein SMU1
PPP5_HUMAN	P53041	56878.6	human	5797.4	3420.9	4081.5				5	4	5				Serine/threonine-protein phosphatase 5
DNLI1_HUMAN	P18858	101736	human	5729.9	3809.6	4107				14	14	14				DNA ligase 1
RAD21_HUMAN	O60216	71689.5	human	5719.7	7974.6	11964.5				8	9	10				Double-strand-break repair protein rad21 homolog
GCDH_HUMAN	Q92947	48127.2	human	5708	3208.4	2727.3				5	5	5				Glutaryl-CoA dehydrogenase, mitochondrial
RT02_HUMAN	Q9Y399	33249.2	human	5706.3	3382.8	1387.2				5	5	3				28S ribosomal protein S2, mitochondrial
VRK1_HUMAN	Q99986	45476	human	5696.6	3994.5	2295				4	4	4				Serine/threonine-protein kinase VRK1
TSN_HUMAN	Q15631	26183	human	5693.4	4774.1	18349.5				3	4	4				Translin
LRBA_HUMAN	P50851	319108	human	5688	5763.6	20751				36	38	43				Lipopolysaccharide-responsive and beige-like anchor protein
CTBL1_HUMAN	Q8WYA6	65173.3	human	5682.9	3735.3	2344.5				6	6	5				Beta-catenin-like protein 1
GPN1_HUMAN	Q9HCN4	41740.1	human	5682.1	2274					3	3					GPN-loop GTPase 1
DPOD2_HUMAN	P49005	51289.5	human	5673.3	3268.1	2517				4	4	4				DNA polymerase delta subunit 2
NRP2_HUMAN	O60462	104831	human	5664.7	3397.3	2913.5				9	9	9				Neuropilin-2
GSK3A_HUMAN	P49840	50980.8	human	5644.3	4099	3816.7				4	4	4				Glycogen synthase kinase-3 alpha
EFGM_HUMAN	Q96RP9	83471.5	human	5638.6	4049.6	2714.1				7	7	7				Elongation factor G, mitochondrial
MMSA_HUMAN	Q02252	57839.7	human	5621.9	4223.9	2995.8				4	4	4				Methylmalonate-semialdehyde dehydrogenase [acylating], mitochondrial
RBM22_HUMAN	Q9NW64	46895.6	human	5616.9	2875.6	1810.1				4	4	4				Pre-mRNA-splicing factor RBM22
AAGAB_HUMAN	Q6PD74	34593.6	human	5609.1	2521.3	3538.5				4	4	4				Alpha- and gamma-adaptin-binding protein p34
TTC38_HUMAN	Q5R3I4	52787.3	human	5565.9	3878	3101				4	4	4				Tetratricopeptide repeat protein 38
PDE4D_HUMAN	Q08499	91114.9	human	5561.1	2087.1	1492.3				6	6	6				cAMP-specific 3',5'-cyclic phosphodiesterase 4D
PRI1_HUMAN	P49642	49902	human	5542.1	2722.3	3209.1				6	5	6				DNA primase small subunit
CRKL_HUMAN	P46109	33777	human	5465.3	4537.3	1199.6				4	4	3				Crk-like protein
GSK3B_HUMAN	P49841	46744.3	human	5455.6	3701.1	2111.4				4	4	3				Glycogen synthase kinase-3 beta
IMA7_HUMAN	O60684	60029.5	human	5449.9	3341.2	2180.3				3	3	3				Importin subunit alpha-7
PHF6_HUMAN	Q8IWS0	41290.4	human	5446.2	2953.3					3	3					PHD finger protein 6
PSPC1_HUMAN	Q8WXF1	58743.6	human	5421.5	3111.3	1641.8				5	5	4				Paraspeckle component 1
TF3C4_HUMAN	Q9UKN8	91982.4	human	5403	3409.9	2158				9	9	8				General transcription factor 3C polypeptide 4
SAMH1_HUMAN	Q9Y3Z3	72200.5	human	5394.6	3384.3	3228.1				9	9	9				Deoxynucleoside triphosphate triphosphohydrolase SAMHD1
SRPK2_HUMAN	P78362	77526.7	human	5391.9	3340.7					5	5					SRSF protein kinase 2
COQ8A_HUMAN	Q8NI60	71950.2	human	5390.4	3705.1	3632.4				5	5	5				Atypical kinase COQ8A, mitochondrial
PRI2_HUMAN	P49643	58806	human	5387	3593	2749.3				7	7	7				DNA primase large subunit
TBC15_HUMAN	Q8TC07	79490.7	human	5370.1	4153.5	6075.6				10	9	10				TBC1 domain family member 15
RM46_HUMAN	Q9H2W6	31705.1	human	5361.8	2409.1	1485.7				3	3	3				39S ribosomal protein L46, mitochondrial
CDC5L_HUMAN	Q99459	92250.6	human	5311.6	3109.9	1831.8				13	13	10				Cell division cycle 5-like protein
ATX10_HUMAN	Q9UBB4	53488.8	human	5299	3721.5	3650.7				8	8	8				Ataxin-10
PNMA2_HUMAN	Q9UL42	41509.4	human	5291.4	3457.5					4	4					Paraneoplastic antigen Ma2
METH_HUMAN	Q99707	140527	human	5282.3	3645.8	4595.1				13	13	14				Methionine synthase
ARL3_HUMAN	P36405	20455.5	human	5263.2	2806.4	2874.6				4	4	4				ADP-ribosylation factor-like protein 3
HCDH_HUMAN	Q16836	34293.5	human	5263.2	2869.1	5152.9				3	3	3				Hydroxyacyl-coenzyme A dehydrogenase, mitochondrial
AASD1_HUMAN	Q9BTE6	45479.6	human	5261.3	3309.9	2106.1				5	5	5				Alanyl-tRNA editing protein Aarsd1
SYAM_HUMAN	Q5JTZ9	107340	human	5254.5	3525.9	3060.8				12	12	12				Alanine--tRNA ligase, mitochondrial
PPM1E_HUMAN	Q8WY54	83951.7	human	5225.7	2531.2	1451.5				3	3	3				Protein phosphatase 1E
SMRD2_HUMAN	Q92925	58920.9	human	5217.3	3770.5	2658.6				9	8	9				SWI/SNF-related matrix-associated actin-dependent regulator of chromatin subfamily D member 2
RPC4_HUMAN	P05423	44395.8	human	5183.1	2618.9					3	3					DNA-directed RNA polymerase III subunit RPC4
RNH2A_HUMAN	O75792	33394.9	human	5165.6	2793.5	2832.2				4	4	4				Ribonuclease H2 subunit A
SAFB2_HUMAN	Q14151	107473	human	5160.5	2352.2	1153.1				5	5	4				Scaffold attachment factor B2
ACON_HUMAN	Q99798	85425.4	human	5147.5	3627.8	3534.7				8	8	8				Aconitate hydratase, mitochondrial
AINX_HUMAN	Q16352	55390.6	human	5145.2	3056.2	6290.9				9	9	9				Alpha-internexin
CDC73_HUMAN	Q6P1J9	60576.6	human	5133.3	2857.9	1074.7				6	6	4				Parafibromin
KIF11_HUMAN	P52732	119159	human	5112.5	5977.8	37907.1				19	25	30				Kinesin-like protein KIF11
RT18B_HUMAN	Q9Y676	29395.6	human	5101.2	3774.3					3	3					28S ribosomal protein S18b, mitochondrial
DDX6_HUMAN	P26196	54416.8	human	5097.3	3181.2	4228.6				4	4	4				Probable ATP-dependent RNA helicase DDX6
PSB7_HUMAN	Q99436	29965.4	human	5093.6	14980.6	474013			15563.7	3	5	7			4	Proteasome subunit beta type-7
NHLC2_HUMAN	Q8NBF2	79443.6	human	5081.6	3045.9	2353.3				5	4	4				NHL repeat-containing protein 2
SQSTM_HUMAN	Q13501	47687.2	human	5065.6	2944.5	1241				4	4	3				Sequestosome-1
NCPR_HUMAN	P16435	76689.7	human	5064.9	1407.8	10854.6				9	5	9				NADPH--cytochrome P450 reductase
pVII	O00116	72911.8	human	5055.6	3154.4	2999.3				7	7	7				Alkyldihydroxyacetonephosphate synthase, peroxisomal
RFC2_HUMAN	P35250	39157.3	human	5053.4	4177.1					3	3					Replication factor C subunit 2
ARC1A_HUMAN	Q92747	41569.3	human	5043.5	3577.6	4104.7				3	3	3				Actin-related protein 2/3 complex subunit 1A
IF2P_HUMAN	O60841	138827	human	5033.7	2096.7					7	7					Eukaryotic translation initiation factor 5B
QKI_HUMAN	Q96PU8	37670.6	human	5019						3						Protein quaking
OCRL_HUMAN	Q01968	104205	human	5001.2	3311.2	2787.1				7	7	7				Inositol polyphosphate 5-phosphatase OCRL
AGAL_HUMAN	P06280	48766.8	human	4996.2	2975.2	2308.1				4	4	4				Alpha-galactosidase A
GFPT1_HUMAN	Q06210	78806.4	human	4991.5	3295.5	2615.5				5	5	5				Glutamine--fructose-6-phosphate aminotransferase [isomerizing] 1
LAMB1_HUMAN	P07942	198038	human	4987.5	15346.7	16784.7				23	26	26				Laminin subunit beta-1
STX7_HUMAN	O15400	29815.5	human	4977.6	8114.4	18761.3				4	4	5				Syntaxin-7
PP4R1_HUMAN	Q8TF05	107004	human	4970	3424	5149.4				10	10	10				Serine/threonine-protein phosphatase 4 regulatory subunit 1
NOP56_HUMAN	O00567	66049.9	human	4912.2	2909.2	1268.6				8	8	5				Nucleolar protein 56
C1TM_HUMAN	Q6UB35	105790	human	4903.8	4195.4	2463.8				10	10	10				Monofunctional C1-tetrahydrofolate synthase, mitochondrial
NDUAA_HUMAN	O95299	40750.6	human	4891.3	2882.4	1642.7				4	4	3				NADH dehydrogenase [ubiquinone] 1 alpha subcomplex subunit 10, mitochondrial
CK5P3_HUMAN	Q96JB5	56920.7	human	4888	3157.9	4672.9				6	6	6				CDK5 regulatory subunit-associated protein 3
AQR_HUMAN	O60306	171295	human	4867.7	2751.9	2234.2				9	9	8				RNA helicase aquarius
ARMC6_HUMAN	Q6NXE6	54141.9	human	4866.2	3681	2063.6				3	3	3				Armadillo repeat-containing protein 6
BRCC3_HUMAN	P46736	36071.9	human	4863.1	2780	2990.2				4	4	4				Lys-63-specific deubiquitinase BRCC36
LRC59_HUMAN	Q96AG4	34930.4	human	4846	4312.5	3781.2				3	3	3				Leucine-rich repeat-containing protein 59
ACO13_HUMAN	Q9NPJ3	14960.5	human	4828.1		6932.4				3		3				Acyl-coenzyme A thioesterase 13
ROAA_HUMAN	Q99729	36224.9	human	4818.7		1758.6				3		3				Heterogeneous nuclear ribonucleoprotein A/B
FXR2_HUMAN	P51116	74223.3	human	4808.8	2984.2	1545				3	3	3				Fragile X mental retardation syndrome-related protein 2
RM39_HUMAN	Q9NYK5	38711.8	human	4801.9	2548.7	1015.1				4	4	3				39S ribosomal protein L39, mitochondrial
RPC1_HUMAN	O14802	155641	human	4746.2	2674.5	1338.5				13	12	12				DNA-directed RNA polymerase III subunit RPC1
RFC3_HUMAN	P40938	40556.3	human	4745	3445.7	2486				3	3	3				Replication factor C subunit 3
ILF3_HUMAN	Q12906	95338.4	human	4738.3	2608.9	1730.9				7	7	7				Interleukin enhancer-binding factor 3
RFC4_HUMAN	P35249	39681.8	human	4738.1	3416.1	2284.9				4	5	4				Replication factor C subunit 4
DNJC2_HUMAN	Q99543	71996.4	human	4716.5	3247.3	1171.3				6	6	6				DnaJ homolog subfamily C member 2
CUL4B_HUMAN	Q13620	103982	human	4693.7	3595.6	6381.8				16	15	16				Cullin-4B
CP51A_HUMAN	Q16850	56805.8	human	4686.8	4518.4	2329.1				7	8	6				Lanosterol 14-alpha demethylase
CND3_HUMAN	Q9BPX3	114334	human	4675.6	4431.9	7528.3				10	10	11				Condensin complex subunit 3
PUS7_HUMAN	Q96PZ0	75035.4	human	4674.4	2827.1	2368.9				11	10	10				Pseudouridylate synthase 7 homolog
ABRX2_HUMAN	Q15018	46900.8	human	4668.9	3196.5	5412				4	4	4				BRISC complex subunit Abraxas 2
ESYT1_HUMAN	Q9BSJ8	122856	human	4668.1	2776.5	3580.8				12	12	12				Extended synaptotagmin-1
ECD_HUMAN	O95905	72758.1	human	4654.9	3217	2865.8				4	4	4				Protein ecdysoneless homolog
ECI2_HUMAN	O75521	43585.1	human	4652.7	2734.8	1198.4				4	4	3				Enoyl-CoA delta isomerase 2
SGT1_HUMAN	Q9Y2Z0	41024.1	human	4646.6	2382.4	1124.1				4	4	4				Protein SGT1 homolog
APC4_HUMAN	Q9UJX5	92116.4	human	4588.4	2170.3	906.6				7	7	6				Anaphase-promoting complex subunit 4
GET4_HUMAN	Q7L5D6	36504.2	human	4572.8	2771	2756.5				3	3	3				Golgi to ER traffic protein 4 homolog
XPO5_HUMAN	Q9HAV4	136311	human	4548.5	3754	4010.5				13	14	13				Exportin-5
NUP98_HUMAN	P52948	197579	human	4535.2	2243	1006.7				8	8	6				Nuclear pore complex protein Nup98-Nup96
MMS19_HUMAN	Q96T76	113290	human	4528.5	3484.3	3381.7				7	7	7				MMS19 nucleotide excision repair protein homolog
TBCE_HUMAN	Q15813	59346.2	human	4523.2	2851.6	1309.1				5	5	4				Tubulin-specific chaperone E
CSTN1_HUMAN	O94985	109793	human	4510.3	3149.3	32079.9				8	8	11				Calsyntenin-1
SNW1_HUMAN	Q13573	61494.4	human	4507.5	2311.7	349.6				7	7	3				SNW domain-containing protein 1
NOP58_HUMAN	Q9Y2X3	59578.2	human	4493.5	2688.8	828.4				5	5	4				Nucleolar protein 58
SNUT2_HUMAN	Q53GS9	65380.5	human	4481.6	2003.2	1120.7				5	4	3				U4/U6.U5 tri-snRNP-associated protein 2
ARPC2_HUMAN	O15144	34333	human	4478.3	2490.8	2880.8				4	4	4				Actin-related protein 2/3 complex subunit 2
SCFD1_HUMAN	Q8WVM8	72379.9	human	4475.6	1998.3	1871.7				7	6	7				Sec1 family domain-containing protein 1
ARI1A_HUMAN	O14497	242045	human	4470.5	3272.6	1821.5				14	14	14				AT-rich interactive domain-containing protein 1A
LAR4B_HUMAN	Q92615	80552	human	4468.4	3563.4	3032.7				4	4	4				La-related protein 4B
P66A_HUMAN	Q86YP4	68062.8	human	4435.5	2977.1	941.1				6	6	4				Transcriptional repressor p66-alpha
WDR5_HUMAN	P61964	36588.5	human	4433	2740.9	2291.5				4	4	4				WD repeat-containing protein 5
CRLF3_HUMAN	Q8IUI8	49765.9	human	4414.7	2807.9	14211.4				7	6	7				Cytokine receptor-like factor 3
TF3C1_HUMAN	Q12789	238875	human	4412	2071.7	815.8				14	14	9				General transcription factor 3C polypeptide 1
TRUA_HUMAN	Q9Y606	47470	human	4406	2577.7	1803.3				4	4	4				tRNA pseudouridine synthase A
BAG6_HUMAN	P46379	119409	human	4398.1	4327.1	6848.9				9	8	10				Large proline-rich protein BAG6
DPYL3_HUMAN	Q14195	61963.3	human	4391	2676.9	1894.5				6	6	5				Dihydropyrimidinase-related protein 3
TLE3_HUMAN	Q04726	83416.6	human	4387.3	2932.7	4016.2				6	6	6				Transducin-like enhancer protein 3
NEUA_HUMAN	Q8NFW8	48379.2	human	4385.4	2725.5	1644.5				4	4	3				N-acylneuraminate cytidylyltransferase
CYFP1_HUMAN	Q7L576	145182	human	4379.2	4618.2	7212.8				13	14	14				Cytoplasmic FMR1-interacting protein 1
KCC2G_HUMAN	Q13555	62607.2	human	4378.5	4185.4	5888.3				4	4	4				Calcium/calmodulin-dependent protein kinase type II subunit gamma
PWP2_HUMAN	Q15269	102452	human	4373.5	3168.4	3492.1				9	9	9				Periodic tryptophan protein 2 homolog
KIF2C_HUMAN	Q99661	81312.9	human	4351.7	3168.4	1914.5				5	5	5				Kinesin-like protein KIF2C
PSMD5_HUMAN	Q16401	56195.7	human	4336.8	2932.6	3358.2				4	4	4				26S proteasome non-ATPase regulatory subunit 5
ABCF2_HUMAN	Q9UG63	71290.3	human	4333.7	2509.2	1639.2				7	6	5				ATP-binding cassette sub-family F member 2
GPSM1_HUMAN	Q86YR5	74510.2	human	4309.1	3023.8	2856.6				6	6	6				G-protein-signaling modulator 1
PCY2_HUMAN	Q99447	43835.5	human	4303.9	2920.2	1709.3				4	4	4				Ethanolamine-phosphate cytidylyltransferase
FACD2_HUMAN	Q9BXW9	164128	human	4302.2	3090.9	7560.2				15	14	18				Fanconi anemia group D2 protein
SYYM_HUMAN	Q9Y2Z4	53199	human	4287	3311.8	1810.5				5	5	4				Tyrosine--tRNA ligase, mitochondrial
NADAP_HUMAN	Q9BWU0	88814.1	human	4274.4	3161.6	2539.1				8	8	8				Kanadaptin
EXOC4_HUMAN	Q96A65	110498	human	4273.9	4088.5	3598.4				11	11	11				Exocyst complex component 4
PAAF1_HUMAN	Q9BRP4	42190	human	4268.1	2832.7	3298.6				3	3	4				Proteasomal ATPase-associated factor 1
NDUS3_HUMAN	O75489	30241.5	human	4255.6	3123.9	3692				4	4	4				NADH dehydrogenase [ubiquinone] iron-sulfur protein 3, mitochondrial
SYMPK_HUMAN	Q92797	141148	human	4231.1	3532.4	6675.6				18	17	18				Symplekin
DNM1L_HUMAN	O00429	81877.1	human	4229	2354.7	1876.1				11	11	11				Dynamin-1-like protein
MCAF1_HUMAN	Q6VMQ6	136394	human	4210.3	1886	1137.4				6	6	4				Activating transcription factor 7-interacting protein 1
FBX22_HUMAN	Q8NEZ5	44508.3	human	4209.2	2056.4	1874.6				3	3	3				F-box only protein 22
MBB1A_HUMAN	Q9BQG0	148855	human	4197.1	3087.2	2413.5				10	10	10				Myb-binding protein 1A
OSBL9_HUMAN	Q96SU4	83184.7	human	4188.1	3012.2	3164.8				7	7	6				Oxysterol-binding protein-related protein 9
PYGL_HUMAN	P06737	97148.6	human	4186.4	2892.7	702.7				8	8	3				Glycogen phosphorylase, liver form
GEMI5_HUMAN	Q8TEQ6	168589	human	4184.8	3759.4	3854.8				13	13	13				Gem-associated protein 5
RABL6_HUMAN	Q3YEC7	79548.8	human	4161.5	4899	2115				4	4	4				Rab-like protein 6
RM19_HUMAN	P49406	33534.9	human	4147.9	2214.8					4	4					39S ribosomal protein L19, mitochondrial
AKP8L_HUMAN	Q9ULX6	71639.7	human	4124.2	1380.8					5	4					A-kinase anchor protein 8-like
PTBP1_HUMAN	P26599	57221.3	human	4092.7	2390.8	2372.3				3	3	3				Polypyrimidine tract-binding protein 1
PP2BA_HUMAN	Q08209	58687.8	human	4082.6	3300.1	3532.8				3	3	3				Serine/threonine-protein phosphatase 2B catalytic subunit alpha isoform
TES_HUMAN	Q9UGI8	47996.4	human	4077	2256.8	2586.8				4	4	3				Testin
RAE1L_HUMAN	P78406	40968.2	human	4074.8	1758.4					3	3					mRNA export factor
TF2B_HUMAN	Q00403	34832.9	human	4074.8	2868.3	1825.5				4	4	4				Transcription initiation factor IIB
PABP4_HUMAN	Q13310	70782.9	human	4045.9	1134.1	1036.8				5	5	4				Polyadenylate-binding protein 4
RL4_HUMAN	P36578	47697.3	human	4042	4365.4	3838.6				5	5	5				60S ribosomal protein L4
AAR2_HUMAN	Q9Y312	43472.2	human	4041.8	1895.6	1059.2				4	4	3				Protein AAR2 homolog
BSDC1_HUMAN	Q9NW68	47163.2	human	4036.9	2699.8	1939.2				3	3	3				BSD domain-containing protein 1
UMPS_HUMAN	P11172	52221.6	human	4030.2	2416.2	2143.3				6	4	6				Uridine 5'-monophosphate synthase
CN37_HUMAN	P09543	47578.6	human	4019.3	2182.9	1733				5	5	5				2',3'-cyclic-nucleotide 3'-phosphodiesterase
CUL1_HUMAN	Q13616	89678.5	human	4017.2	3276	3743.9				9	9	9				Cullin-1
PIHD1_HUMAN	Q9NWS0	32362.9	human	4011.5	4524.6	3537.7				4	4	4				PIH1 domain-containing protein 1
AL3A2_HUMAN	P51648	54847.8	human	3985.1	2741	4215.3				4	4	4				Aldehyde dehydrogenase family 3 member A2
GLMN_HUMAN	Q92990	68208.2	human	3971.7	2378	2500				5	5	5				Glomulin
FA98B_HUMAN	Q52LJ0	45547.2	human	3965.7	2108.7	1063.6				3	3	3				Protein FAM98B
SLK_HUMAN	Q9H2G2	142695	human	3946.1	4437.2	55568.2				16	14	32				STE20-like serine/threonine-protein kinase
WDR26_HUMAN	Q9H7D7	72124	human	3944	5700	10781				7	7	8				WD repeat-containing protein 26
ANR28_HUMAN	O15084	112966	human	3939.4	2206.1	1339.6				7	7	7				Serine/threonine-protein phosphatase 6 regulatory ankyrin repeat subunit A
SCRIB_HUMAN	Q14160	174885	human	3938.4	2595.4	1806.9				11	11	11				Protein scribble homolog
IVa2	A6NIH7	28136.6	human	3932	2074.2					3	3					Protein unc-119 homolog B
STAG2_HUMAN	Q8N3U4	141326	human	3928.1	4490.5	6431.3				13	13	12				Cohesin subunit SA-2
ZW10_HUMAN	O43264	88829.5	human	3907.2	2974.3	2771.5				6	6	6				Centromere/kinetochore protein zw10 homolog
HELLS_HUMAN	Q9NRZ9	97073.9	human	3872.2	3034.1	1587.8				8	7	7				Lymphoid-specific helicase
PPID_HUMAN	Q08752	40763.6	human	3867.1	2352	1411.4				5	5	5				Peptidyl-prolyl cis-trans isomerase D
AL9A1_HUMAN	P49189	53801.9	human	3851.3		2536.2				4		4				4-trimethylaminobutyraldehyde dehydrogenase
TTC1_HUMAN	Q99614	33526.1	human	3849.7	10579.9	23577.3				4	6	6				Tetratricopeptide repeat protein 1
CTDP1_HUMAN	Q9Y5B0	104399	human	3833.7	2352.1	1488.6				4	4	4				RNA polymerase II subunit A C-terminal domain phosphatase
PODXL_HUMAN	O00592	58635.2	human	3832.9	6931.4	22717.3				5	5	5				Podocalyxin
PPCE_HUMAN	P48147	80699.5	human	3795.6	1865.7	1274.6				7	7	7				Prolyl endopeptidase
NB5R3_HUMAN	P00387	34234.8	human	3768.3	1270.9	3355.9				4	3	4				NADH-cytochrome b5 reductase 3
PTCD3_HUMAN	Q96EY7	78549.7	human	3765.6	2819.5	1940.5				6	6	6				Pentatricopeptide repeat domain-containing protein 3, mitochondrial
MAGD2_HUMAN	Q9UNF1	64954.2	human	3756.3	3060	2197.2				9	9	9				Melanoma-associated antigen D2
TBC17_HUMAN	Q9HA65	72728.3	human	3734.2	2701.8	5601.3				3	3	4				TBC1 domain family member 17
AGM1_HUMAN	O95394	59851.9	human	3733.1	2556.3	2766				3	3	3				Phosphoacetylglucosamine mutase
EHD1_HUMAN	Q9H4M9	60626.9	human	3727.4	2264.8	1639.1				4	4	4				EH domain-containing protein 1
SYSM_HUMAN	Q9NP81	58282.5	human	3704.1	3165.8	1493.4				5	5	4				Serine--tRNA ligase, mitochondrial
NDUA5_HUMAN	Q16718	13458.7	human	3703	2397.3	2692.6				3	3	3				NADH dehydrogenase [ubiquinone] 1 alpha subcomplex subunit 5
HSDL2_HUMAN	Q6YN16	45394.7	human	3696.3	2367.6	2530.7				4	4	3				Hydroxysteroid dehydrogenase-like protein 2
MAT2B_HUMAN	Q9NZL9	37551.8	human	3679.7	1942.7	1492				3	3	3				Methionine adenosyltransferase 2 subunit beta
XRCC1_HUMAN	P18887	69476.5	human	3670.2	1750.3	962.1				4	4	4				DNA repair protein XRCC1
SKIV2_HUMAN	Q15477	137755	human	3655.6	2816.4	2590.8				9	10	9				Helicase SKI2W
RM03_HUMAN	P09001	38632.6	human	3644.4	2436.3	4275.7				4	4	4				39S ribosomal protein L3, mitochondrial
RBM39_HUMAN	Q14498	59379.6	human	3639.6	3264.4	2886.7				4	4	4				RNA-binding protein 39
PUR8_HUMAN	P30566	54889.3	human	3635.7	3162.7	4309.6				4	4	4				Adenylosuccinate lyase
DDX1_HUMAN	Q92499	82432.1	human	3623.4	1869.2	1331.3				6	6	6				ATP-dependent RNA helicase DDX1
MK09_HUMAN	P45984	48139.1	human	3617.4	2457.5	2324.5				3	3	3				Mitogen-activated protein kinase 9
APC1_HUMAN	Q9H1A4	216500	human	3613.3	1550.6	1496.1				15	14	8				Anaphase-promoting complex subunit 1
BL1S3_HUMAN	Q6QNY0	21255.6	human	3604.8	8943.9	22983.2				5	7	7				Biogenesis of lysosome-related organelles complex 1 subunit 3
COG6_HUMAN	Q9Y2V7	73279	human	3603.5	3216.7	3400				6	6	6				Conserved oligomeric Golgi complex subunit 6
HECD1_HUMAN	Q9ULT8	289384	human	3573	4738.2	6376.6				22	24	23				E3 ubiquitin-protein ligase HECTD1
CDK5_HUMAN	Q00535	33304.5	human	3553.4	1953.6	1679.3				3	3	3				Cyclin-dependent-like kinase 5
RCL1_HUMAN	Q9Y2P8	40842.6	human	3547	2145.3	2025.7				4	4	4				RNA 3'-terminal phosphate cyclase-like protein
EXOC3_HUMAN	O60645	85567.4	human	3541.2	3117.4	2727.9				10	10	9				Exocyst complex component 3
TBC9B_HUMAN	Q66K14	140525	human	3526	2670.8	5608				13	12	14				TBC1 domain family member 9B
KGP1_HUMAN	Q13976	76364.5	human	3515.3	2763.8	1727.4				8	8	6				cGMP-dependent protein kinase 1
CTND1_HUMAN	O60716	108170	human	3500.1	2420.5	1599.6				8	8	8				Catenin delta-1
THOC1_HUMAN	Q96FV9	75666.3	human	3490.9	2360.6	2459.2				5	5	5				THO complex subunit 1
IPO8_HUMAN	O15397	119938	human	3477.9	2429.8	3646.2				9	8	9				Importin-8
KDM1A_HUMAN	O60341	92902.6	human	3442	2460.1	2245.1				10	9	8				Lysine-specific histone demethylase 1A
DRG1_HUMAN	Q9Y295	40542.2	human	3440	1714.7	571.8				4	4	3				Developmentally-regulated GTP-binding protein 1
pVIII	O00139	79954.5	human	3434.6	2345.3	1457.4				5	5	5				Kinesin-like protein KIF2A
DAAF5_HUMAN	Q86Y56	93521.1	human	3432.6	2302.9	2072.9				8	8	8				Dynein assembly factor 5, axonemal
CTBP1_HUMAN	Q13363	47535.3	human	3425	2167.8	2161.8				3	3	3				C-terminal-binding protein 1
PDE12_HUMAN	Q6L8Q7	67351.5	human	3424.7	2017.1	1365.6				3	3	3				2',5'-phosphodiesterase 12
DDX21_HUMAN	Q9NR30	87344.4	human	3421	1457.2					4	4					Nucleolar RNA helicase 2
RM37_HUMAN	Q9BZE1	48117.5	human	3416.2	2334.1	1118.9				5	5	5				39S ribosomal protein L37, mitochondrial
CAN1_HUMAN	P07384	81890.1	human	3415.7	2783	2328.3				4	4	4				Calpain-1 catalytic subunit
CTR9_HUMAN	Q6PD62	133502	human	3415.2	1574.5	78.8				9	8	3				RNA polymerase-associated protein CTR9 homolog
SMCA2_HUMAN	P51531	181279	human	3414.9	2500.9	950.5				6	6	4				Probable global transcription activator SNF2L2
CCNB1_HUMAN	P14635	48337.4	human	3405.6	2675.5	1153.5				4	4	3				G2/mitotic-specific cyclin-B1
DIEXF_HUMAN	Q68CQ4	87055.1	human	3347.8	1731.3					4	4					Digestive organ expansion factor homolog
EI2BB_HUMAN	P49770	38989.6	human	3325.4	1904.2					3	3					Translation initiation factor eIF-2B subunit beta
ZC3HF_HUMAN	Q8WU90	48602.5	human	3315.7	1780.5					4	4					Zinc finger CCCH domain-containing protein 15
RT22_HUMAN	P82650	41280.4	human	3308.8	2126.3	1021.1				6	5	4				28S ribosomal protein S22, mitochondrial
HS12A_HUMAN	O43301	74978.4	human	3307.3	1849.7	993.3				8	8	8				Heat shock 70 kDa protein 12A
NU214_HUMAN	P35658	213620	human	3306.4	1720.4	1014				13	13	11				Nuclear pore complex protein Nup214
LYAG_HUMAN	P10253	105324	human	3255.1	1757.5	2621.7				9	8	8				Lysosomal alpha-glucosidase
F120A_HUMAN	Q9NZB2	121888	human	3251.6	2169.3	1680.6				7	7	7				Constitutive coactivator of PPAR-gamma-like protein 1
NXF1_HUMAN	Q9UBU9	70182.4	human	3250.7	2380.3	1463.4				5	5	5				Nuclear RNA export factor 1
HEMH_HUMAN	P22830	47862.2	human	3249.1	1786.3	1117.1				4	4	3				Ferrochelatase, mitochondrial
WDR92_HUMAN	Q96MX6	39740.4	human	3233.5	3316.9	3843.2				4	3	4				WD repeat-containing protein 92
PELO_HUMAN	Q9BRX2	43359.2	human	3191.5	2157.3	1145.7				3	3	3				Protein pelota homolog
TRM6_HUMAN	Q9UJA5	55799.3	human	3176.9	2314.8	2891.4				4	4	4				tRNA (adenine(58)-N(1))-methyltransferase non-catalytic subunit TRM6
PGES2_HUMAN	Q9H7Z7	41943.1	human	3144.9	1962.4					3	3					Prostaglandin E synthase 2
RTCA_HUMAN	O00442	39336.7	human	3133.7	2551.7	1388.6				3	3	3				RNA 3'-terminal phosphate cyclase
GRL1A_HUMAN	P0CAP2	41739.6	human	3127.8	1300.3					4	3					DNA-directed RNA polymerase II subunit GRINL1A
NOSIP_HUMAN	Q9Y314	33172	human	3124.1	2117.9	1151.8				4	4	4				Nitric oxide synthase-interacting protein
ITPK1_HUMAN	Q13572	45621.1	human	3114.5	2035.9	1789.7				3	3	3				Inositol-tetrakisphosphate 1-kinase
RT31_HUMAN	Q92665	45318.5	human	3103.8	1989.6	1219.9				5	5	4				28S ribosomal protein S31, mitochondrial
RTRAF_HUMAN	Q9Y224	28068.1	human	3096.2	1228.4					4	3					RNA transcription, translation and transport factor protein
KAP0_HUMAN	P10644	42981.7	human	3091.7	1599.3	709.8				3	3	3				cAMP-dependent protein kinase type I-alpha regulatory subunit
ZPR1_HUMAN	O75312	50925.3	human	3081.9	2490.7	4835.1				5	4	5				Zinc finger protein ZPR1
UBE3A_HUMAN	Q05086	100688	human	3050.2	2037	3021				6	6	5				Ubiquitin-protein ligase E3A
HBS1L_HUMAN	Q9Y450	75472.9	human	3050	2207.9	930.3				7	7	4				HBS1-like protein
TTC37_HUMAN	Q6PGP7	175486	human	3049.4	2508.6	2531				11	11	11				Tetratricopeptide repeat protein 37
ACTY_HUMAN	P42025	42293.4	human	3041.3	3671.9	4364				3	3	3				Beta-centractin
NPL4_HUMAN	Q8TAT6	68120.2	human	3034.3	1343.3	1157.6				5	5	3				Nuclear protein localization protein 4 homolog
RSF1_HUMAN	Q96T23	163821	human	3029.1	2064.3	601.2				11	11	7				Remodeling and spacing factor 1
EXOC1_HUMAN	Q9NV70	101982	human	3019.5	2810.1	1984.4				6	6	6				Exocyst complex component 1
LUC7L_HUMAN	Q9NQ29	43728	human	3012.7	2842.4					3	3					Putative RNA-binding protein Luc7-like 1
RAE1_HUMAN	P24386	73475.7	human	3002.3	1743	2267.1				3	3	3				Rab proteins geranylgeranyltransferase component A 1
SDS3_HUMAN	Q9H7L9	38136.1	human	2992	1691.4					3	3					Sin3 histone deacetylase corepressor complex component SDS3
VPS4B_HUMAN	O75351	49302.1	human	2988.2	1662.3	1045.7				3	3	3				Vacuolar protein sorting-associated protein 4B
PGTA_HUMAN	Q92696	65071.8	human	2961.4	1877.5	1815.3				5	5	5				Geranylgeranyl transferase type-2 subunit alpha
SPTC1_HUMAN	O15269	52743.9	human	2946.8	1931.8	2381.5				3	3	3				Serine palmitoyltransferase 1
HLAA_HUMAN	P04439	40840.7	human	2939.4	2844.8	3865.9				4	5	5				HLA class I histocompatibility antigen, A alpha chain
ADDA_HUMAN	P35611	80955.1	human	2939.4	2290.7	6222				6	5	6				Alpha-adducin
WDR18_HUMAN	Q9BV38	47405.2	human	2928.7	2038.3	1963				3	3	3				WD repeat-containing protein 18
KSYK_HUMAN	P43405	72066.2	human	2925.6	2002.4	1606.8				5	5	5				Tyrosine-protein kinase SYK
GTPB1_HUMAN	O00178	72453.8	human	2919	1890.6	1589.1				5	4	4				GTP-binding protein 1
RANB9_HUMAN	Q96S59	77847.3	human	2913.9	4726.1	12194.1				9	10	10				Ran-binding protein 9
TF65_HUMAN	Q04206	60219.2	human	2912.3	2662.3	8298.7				3	4	4				Transcription factor p65
GOGA3_HUMAN	Q08378	167355	human	2910.1	3748.2	9856.1				21	28	33				Golgin subfamily A member 3
SYIM_HUMAN	Q9NSE4	113792	human	2893.9	1760.8	2150.6				6	6	6				Isoleucine--tRNA ligase, mitochondrial
ECM29_HUMAN	Q5VYK3	204291	human	2878.7	2787.7	4239.7				17	18	18				Proteasome adapter and scaffold protein ECM29
TGO1_HUMAN	Q5JRA6	213702	human	2874.7	1405.2	984.4				12	12	11				Transport and Golgi organization protein 1 homolog
RPN1_HUMAN	P04843	68569.4	human	2871.1	2541.5	3705.7				6	7	7				Dolichyl-diphosphooligosaccharide--protein glycosyltransferase subunit 1
ZCHC8_HUMAN	Q6NZY4	78577.4	human	2854.3	2896.7	3557.4				5	5	5				Zinc finger CCHC domain-containing protein 8
DPOD1_HUMAN	P28340	123631	human	2845.7	1855.7	1466.4				10	10	10				DNA polymerase delta catalytic subunit
CADH2_HUMAN	P19022	99809.3	human	2835	1051.2	4357.4				4	3	6				Cadherin-2
TBL3_HUMAN	Q12788	89034.7	human	2828.3	2212.8	2515.6				6	7	7				Transducin beta-like protein 3
SEH1_HUMAN	Q96EE3	39648.6	human	2809.6	1738.5	1422				4	4	4				Nucleoporin SEH1
TPC12_HUMAN	Q8WVT3	79375.1	human	2808.8	1868	2556.3				5	5	5				Trafficking protein particle complex subunit 12
TCOF_HUMAN	Q13428	152106	human	2801.8	1121	780.8				10	9	9				Treacle protein
TTC27_HUMAN	Q6P3X3	96632.4	human	2798.9	2005.5	1519.2				7	7	7				Tetratricopeptide repeat protein 27
XIAP_HUMAN	P98170	56684.9	human	2781.5	1340.5	498.9				4	4	3				E3 ubiquitin-protein ligase XIAP
PEX5_HUMAN	P50542	70864.8	human	2779.3	1291.8	1413.3				5	5	4				Peroxisomal targeting signal 1 receptor
SEPT9_HUMAN	Q9UHD8	65401.4	human	2770.3	2252.5	3482.7				6	6	6				Septin-9
ILK_HUMAN	Q13418	51419.2	human	2693.4	1774.7	992.9				4	4	3				Integrin-linked protein kinase
GPKOW_HUMAN	Q92917	52228.8	human	2690.2	1500					3	3					G-patch domain and KOW motifs-containing protein
TE2IP_HUMAN	Q9NYB0	44260	human	2675.9	1967.4	1701.6				4	4	3				Telomeric repeat-binding factor 2-interacting protein 1
NCKP1_HUMAN	Q9Y2A7	128790	human	2659.7	2077.1	3310.6				7	7	8				Nck-associated protein 1
FIP1_HUMAN	Q6UN15	66526.4	human	2647.3	552.3					4	4					Pre-mRNA 3'-end-processing factor FIP1
PEX19_HUMAN	P40855	32806.5	human	2629.3	1691.4	6421.3				5	4	6				Peroxisomal biogenesis factor 19
APC5_HUMAN	Q9UJX4	85076.9	human	2623.6	1227.5					4	4					Anaphase-promoting complex subunit 5
DDX23_HUMAN	Q9BUQ8	95582.5	human	2622.1	1508.6					4	4					Probable ATP-dependent RNA helicase DDX23
PHKG2_HUMAN	P15735	46442.2	human	2620.9	2053.5	2298.3				4	4	4				Phosphorylase b kinase gamma catalytic chain, liver/testis isoform
BL1S4_HUMAN	Q9NUP1	23351.2	human	2599.8	4171.9	11464.1				3	3	3				Biogenesis of lysosome-related organelles complex 1 subunit 4
SLN11_HUMAN	Q7Z7L1	102836	human	2598.5	2057.3	1807.6				6	6	6				Schlafen family member 11
AASS_HUMAN	Q9UDR5	102132	human	2592.3	1448.9	1217				5	5	5				Alpha-aminoadipic semialdehyde synthase, mitochondrial
NU155_HUMAN	O75694	155199	human	2577.9	1599.1	1230.7				7	7	6				Nuclear pore complex protein Nup155
GNPAT_HUMAN	O15228	77187.9	human	2573.1	1570.4	1501.8				4	4	4				Dihydroxyacetone phosphate acyltransferase
PAPS1_HUMAN	O43252	70833.1	human	2564.9	1630.6	862.5				4	4	4				Bifunctional 3'-phosphoadenosine 5'-phosphosulfate synthase 1
IKKA_HUMAN	O15111	84639.6	human	2556.9	2205.7	1376.1				5	5	4				Inhibitor of nuclear factor kappa-B kinase subunit alpha
FUCO2_HUMAN	Q9BTY2	54066.7	human	2556.9	2261.6	1423.1				3	3	3				Plasma alpha-L-fucosidase
VPS52_HUMAN	Q8N1B4	82221.2	human	2553.9	1809.3	2247.2				5	5	4				Vacuolar protein sorting-associated protein 52 homolog
FANCI_HUMAN	Q9NVI1	149324	human	2550.5	2102.4	3186.6				13	13	14				Fanconi anemia group I protein
RAB7A_HUMAN	P51149	23489.7	human	2544.4	1916.1					3	3					Ras-related protein Rab-7a
DNLI3_HUMAN	P49916	112907	human	2540.1	1471.8	927.4				6	6	6				DNA ligase 3
ANXA6_HUMAN	P08133	75873.3	human	2532.7	2080.1	2428.1				9	9	8				Annexin A6
SMRCD_HUMAN	Q9H4L7	117402	human	2530.6	1173.3					6	5					SWI/SNF-related matrix-associated actin-dependent regulator of chromatin subfamily A containing DEAD/H box 1
ANXA2_HUMAN	P07355	38604	human	2526.1	2151.6	1446	1164.1	1441.7		5	5	5	4	6		Annexin A2
CRNL1_HUMAN	Q9BZJ0	100452	human	2518.4	1481.8	522.8				7	7	4				Crooked neck-like protein 1
CSTFT_HUMAN	Q9H0L4	64436.5	human	2507.6	1638.5	1870.2				3	3	3				Cleavage stimulation factor subunit 2 tau variant
NUDC1_HUMAN	Q96RS6	66755.8	human	2504.1	1306.8	1535				3	3	3				NudC domain-containing protein 1
IPO11_HUMAN	Q9UI26	112535	human	2479	1790.3	2264.5				6	6	6				Importin-11
WDR55_HUMAN	Q9H6Y2	42070	human	2477						4						WD repeat-containing protein 55
SPRE_HUMAN	P35270	28048.5	human	2446.2	1603.1					3	3					Sepiapterin reductase
PDIP3_HUMAN	Q9BY77	46089.3	human	2436	1568.5	856.8				3	3	3				Polymerase delta-interacting protein 3
EXOSX_HUMAN	Q01780	100831	human	2431.1	1575.9	1124.6				7	7	7				Exosome component 10
ATG4B_HUMAN	Q9Y4P1	44294.4	human	2412	1356.1	1250.2				4	4	4				Cysteine protease ATG4B
HDGR2_HUMAN	Q7Z4V5	74316.8	human	2392.6	696					4	4					Hepatoma-derived growth factor-related protein 2
FNTA_HUMAN	P49354	44408.6	human	2389.6	992.2	2789.8				4	3	3				Protein farnesyltransferase/geranylgeranyltransferase type-1 subunit alpha
EHD3_HUMAN	Q9NZN3	60887.1	human	2366.8		888.4				3		3				EH domain-containing protein 3
MPP6_HUMAN	Q9NZW5	61117	human	2353.3	1403.8	852.1				6	6	6				MAGUK p55 subfamily member 6
STAT3_HUMAN	P40763	88067.8	human	2328.9	1699.6	2088.2				6	6	6				Signal transducer and activator of transcription 3
TMED8_HUMAN	Q6PL24	35740.5	human	2313.4	1526	3637.6				4	3	4				Protein TMED8
B2L13_HUMAN	Q9BXK5	52723.2	human	2313.1	2173	5015.1				5	5	5				Bcl-2-like protein 13
MAP4_HUMAN	P27816	121005	human	2306.9	2213.9	2893				12	12	12				Microtubule-associated protein 4
HECD3_HUMAN	Q5T447	97112.9	human	2304.1	2641.8	3150.1				6	6	6				E3 ubiquitin-protein ligase HECTD3
TMEDA_HUMAN	P49755	24976	human	2303.8	2110.2	1969.5				3	3	3				Transmembrane emp24 domain-containing protein 10
YPEL5_HUMAN	P62699	13841.6	human	2299.5	3406.4	7583.7				3	3	3				Protein yippee-like 5
ELP2_HUMAN	Q6IA86	92500	human	2298.1	1610.5	2326.8				4	4	3				Elongator complex protein 2
RAB8A_HUMAN	P61006	23668.2	human	2292.8	834.6	1194.7				3	3	3				Ras-related protein Rab-8A
FAKD4_HUMAN	Q969Z0	70738	human	2278.1	1924.4	1473.2				3	3	3				FAST kinase domain-containing protein 4
SYTM_HUMAN	Q9BW92	81036.1	human	2276.6	1653.7	1230.5				5	5	5				Threonine--tRNA ligase, mitochondrial
RM45_HUMAN	Q9BRJ2	35350.9	human	2260						3						39S ribosomal protein L45, mitochondrial
GCP2_HUMAN	Q9BSJ2	102534	human	2258.1	2334.7	1794.7				8	8	8				Gamma-tubulin complex component 2
LRWD1_HUMAN	Q9UFC0	70861.2	human	2242.2	1310.5	895.8				5	5	4				Leucine-rich repeat and WD repeat-containing protein 1
ATX2L_HUMAN	Q8WWM7	113374	human	2236.8	1016.3	976				5	5	5				Ataxin-2-like protein
VPS4A_HUMAN	Q9UN37	48897.9	human	2232.5						3						Vacuolar protein sorting-associated protein 4A
ANKH1_HUMAN	Q8IWZ3	269458	human	2228	1668.1	1602				9	9	9				Ankyrin repeat and KH domain-containing protein 1
DBR1_HUMAN	Q9UK59	61554.9	human	2227.3		1179.1				3		3				Lariat debranching enzyme
EXOC8_HUMAN	Q8IYI6	81799.1	human	2226.8	1563.1	1705.4				6	7	7				Exocyst complex component 8
AP1B1_HUMAN	Q10567	104637	human	2217.6	1338	4903.4				4	3	6				AP-1 complex subunit beta-1
ASH2L_HUMAN	Q9UBL3	68722.8	human	2202.7		1164.8				3		3				Set1/Ash2 histone methyltransferase complex subunit ASH2
CNN3_HUMAN	Q15417	36413.7	human	2195.5	1696	791.9				3	3	3				Calponin-3
GLSK_HUMAN	O94925	73461.1	human	2192.3	952.8	778.9				5	4	3				Glutaminase kidney isoform, mitochondrial
UBR5_HUMAN	O95071	309352	human	2188.5	1420.8	1489.7				15	15	12				E3 ubiquitin-protein ligase UBR5
CNOT3_HUMAN	O75175	81872	human	2185.5	1750.3	2421.3				3	3	3				CCR4-NOT transcription complex subunit 3
AT1A1_HUMAN	P05023	112896	human	2169.2	2502.8	6414.7				7	7	9				Sodium/potassium-transporting ATPase subunit alpha-1
BL1S1_HUMAN	P78537	17262.6	human	2168.4	3321.3	10772.7				3	3	4				Biogenesis of lysosome-related organelles complex 1 subunit 1
PKN2_HUMAN	Q16513	112035	human	2160.2	1382.5	1090.7				7	7	7				Serine/threonine-protein kinase N2
UBA3_HUMAN	Q8TBC4	51852.4	human	2155.1	921.1	3156.1				4	3	4				NEDD8-activating enzyme E1 catalytic subunit
RCC2_HUMAN	Q9P258	56084.5	human	2142.8	1460.8	973.2				3	3	3				Protein RCC2
RT29_HUMAN	P51398	45566.4	human	2137.9	1323.2					3	3					28S ribosomal protein S29, mitochondrial
L2HDH_HUMAN	Q9H9P8	50316.1	human	2135.6	1319.2	1324.1				4	3	4				L-2-hydroxyglutarate dehydrogenase, mitochondrial
VP26B_HUMAN	Q4G0F5	39154.7	human	2133.4	1196.3	1147.2				3	3	3				Vacuolar protein sorting-associated protein 26B
SUCB2_HUMAN	Q96I99	46510.6	human	2127.7	1324.1	1113.7				5	5	5				Succinate--CoA ligase [GDP-forming] subunit beta, mitochondrial
SPSY_HUMAN	P52788	41268.2	human	2124.5	1589.4	5084.5				5	3	5				Spermine synthase
MET2B_HUMAN	Q6P1Q9	43426.1	human	2123.6	1371.2	851.8				3	3	3				tRNA N(3)-methylcytidine methyltransferase METTL2B
NEMF_HUMAN	O60524	122954	human	2119.2	1389.7	286.8				5	5	3				Nuclear export mediator factor NEMF
FTO_HUMAN	Q9C0B1	58282	human	2104.8	1653.6	3726				8	8	10				Alpha-ketoglutarate-dependent dioxygenase FTO
ARHG2_HUMAN	Q92974	111543	human	2095.8	1392.8	688.5				5	5	4				Rho guanine nucleotide exchange factor 2
MDC1_HUMAN	Q14676	226666	human	2092.3	1330.2	614.9				9	9	6				Mediator of DNA damage checkpoint protein 1
UBE3C_HUMAN	Q15386	123923	human	2088.6	1675.1	1233.3				7	7	6				Ubiquitin-protein ligase E3C
DSRAD_HUMAN	P55265	136066	human	2087.7	1215.1	1082.4				9	9	9				Double-stranded RNA-specific adenosine deaminase
SPTN2_HUMAN	O15020	271325	human	2084.4	2755.1	8654				13	20	32				Spectrin beta chain, non-erythrocytic 2
MAP1S_HUMAN	Q66K74	112211	human	2081.5	1226.9	1063.1				6	6	6				Microtubule-associated protein 1S
MYO6_HUMAN	Q9UM54	149691	human	2077	1477.6	1174.6				10	11	10				Unconventional myosin-VI
ODBA_HUMAN	P12694	50471	human	2076.8	1301.6	660.9				4	4	3				2-oxoisovalerate dehydrogenase subunit alpha, mitochondrial
SMRD1_HUMAN	Q96GM5	58232.5	human	2073.5	1760.3					3	3					SWI/SNF-related matrix-associated actin-dependent regulator of chromatin subfamily D member 1
VATH_HUMAN	Q9UI12	55883.1	human	2060.5	1276.5	1241.9				3	3	3				V-type proton ATPase subunit H
NIPA_HUMAN	Q86WB0	55261.5	human	2055.1	1125.2	947.1				4	4	4				Nuclear-interacting partner of ALK
WDR75_HUMAN	Q8IWA0	94498.8	human	2045.8	1450	1170.8				7	6	7				WD repeat-containing protein 75
hexon	A6NHR9	226374	human	2039.8	1806.3	1434.3				16	16	14				Structural maintenance of chromosomes flexible hinge domain-containing protein 1
RT27_HUMAN	Q92552	47611.4	human	2020.9	1158.4	752.7				4	4	4				28S ribosomal protein S27, mitochondrial
CPSF1_HUMAN	Q10570	160884	human	2016.4	1220.3	979.4				7	7	6				Cleavage and polyadenylation specificity factor subunit 1
WDR74_HUMAN	Q6RFH5	42441.2	human	2015.9	1481.8	1315.9				4	4	4				WD repeat-containing protein 74
INF2_HUMAN	Q27J81	135624	human	2013.3	1707.7	2808.3				12	13	14				Inverted formin-2
E4_ORF4	A0MZ66	71639.9	human	2011.6	1837.5	4081.9				7	7	7				Shootin-1
PP1R7_HUMAN	Q15435	41564.2	human	2000.2	1069.5	13210.4				5	5	9				Protein phosphatase 1 regulatory subunit 7
FL2D_HUMAN	Q15007	44243.6	human	1985.8	246.5	511.6				4	3	4				Pre-mRNA-splicing regulator WTAP
PKN1_HUMAN	Q16512	103932	human	1978.7	1238.5	1075.8				6	6	6				Serine/threonine-protein kinase N1
ACD11_HUMAN	Q709F0	87264.4	human	1952.3	1764.3	942.8				4	4	4				Acyl-CoA dehydrogenase family member 11
PSF1_HUMAN	Q14691	22988.4	human	1948.6	1838.4	6906				3	3	3				DNA replication complex GINS protein PSF1
GBF1_HUMAN	Q92538	206446	human	1943.2	2008.4	7955.3				16	14	20				Golgi-specific brefeldin A-resistance guanine nucleotide exchange factor 1
CKAP5_HUMAN	Q14008	225495	human	1937.6	1636.4	1775.8				16	15	15				Cytoskeleton-associated protein 5
DAXX_HUMAN	Q9UER7	81372.6	human	1936.3	865.8					3	3					Death domain-associated protein 6
SRC8_HUMAN	Q14247	61586.1	human	1927.2	1833.4	640				5	5	4				Src substrate cortactin
YTHD1_HUMAN	Q9BYJ9	60873.6	human	1924.7	1002.3	333.6				3	3	3				YTH domain-containing family protein 1
RPC2_HUMAN	Q9NW08	127785	human	1913.1	1074.2	487.6				7	6	5				DNA-directed RNA polymerase III subunit RPC2
EMAL1_HUMAN	O00423	89860.9	human	1889	2186.2	1710.3				7	7	7				Echinoderm microtubule-associated protein-like 1
KPRA_HUMAN	Q14558	39393.7	human	1885.2	1129	983				3	3	3				Phosphoribosyl pyrophosphate synthase-associated protein 1
DDI2_HUMAN	Q5TDH0	44522.6	human	1882.7	999	681.8				3	3	3				Protein DDI1 homolog 2
DNA_binding_protein	A0AVT1	117970	human	1868	1262.2	1001.1				8	7	7				Ubiquitin-like modifier-activating enzyme 6
ATG7_HUMAN	O95352	77959.6	human	1856	1336.5	1100.5				5	5	5				Ubiquitin-like modifier-activating enzyme ATG7
DPOE1_HUMAN	Q07864	261518	human	1854.4	1406.4	1061.2				12	12	12				DNA polymerase epsilon catalytic subunit A
IF4G3_HUMAN	O43432	176652	human	1853.9	1271.8	1918.1				9	9	9				Eukaryotic translation initiation factor 4 gamma 3
TRM5_HUMAN	Q32P41	58246.2	human	1852.4	1240.9	952.7				4	4	4				tRNA (guanine(37)-N1)-methyltransferase
OGT1_HUMAN	O15294	116925	human	1847.4	1478.9	1274.1				6	6	6				UDP-N-acetylglucosamine--peptide N-acetylglucosaminyltransferase 110 kDa subunit
UBXN7_HUMAN	O94888	54862.3	human	1842.9	1033.5	2669.6				4	5	5				UBX domain-containing protein 7
PDXD1_HUMAN	Q6P996	86706.9	human	1841.1	1285	949.9				3	3	3				Pyridoxal-dependent decarboxylase domain-containing protein 1
RBGP1_HUMAN	Q9Y3P9	121737	human	1824.5	1776	9270.4				11	14	18				Rab GTPase-activating protein 1
RIOK1_HUMAN	Q9BRS2	65583	human	1818.8	1235.7					4	4					Serine/threonine-protein kinase RIO1
PRDX3_HUMAN	P30048	27692.7	human	1814.5	1730.8	4041.7				3	4	4				Thioredoxin-dependent peroxide reductase, mitochondrial
TBCD4_HUMAN	O60343	146563	human	1813.5	1686.7	3603.2				8	8	8				TBC1 domain family member 4
ZCCHV_HUMAN	Q7Z2W4	101431	human	1811.6	1515.2	1335.7				5	6	6				Zinc finger CCCH-type antiviral protein 1
LDHB_HUMAN	P07195	36638.5	human	1794.9	1450.3	1346.2				3	3	3				L-lactate dehydrogenase B chain
GOGA2_HUMAN	Q08379	113086	human	1789.6	1812	705				6	7	6				Golgin subfamily A member 2
BD1L1_HUMAN	Q8NFC6	330466	human	1786	852.3	2006.2				14	13	13				Biorientation of chromosomes in cell division protein 1-like 1
MYH9_HUMAN	P35579	226532	human	1779.2	846.7	2486.4				19	15	21				Myosin-9
SPART_HUMAN	Q8N0X7	72833	human	1762.2	1295.9	1052				4	4	4				Spartin
CF298_HUMAN	P57076	33224.2	human	1758	917.1					3	3					Cilia- and flagella-associated protein 298
OSB11_HUMAN	Q9BXB4	83643.2	human	1757.3	1590.9	1383.6				4	3	4				Oxysterol-binding protein-related protein 11
EXOS7_HUMAN	Q15024	31821.4	human	1757.2	982.8	1727.7				3	3	3				Exosome complex component RRP42
SAAL1_HUMAN	Q96ER3	53558	human	1756.5	640.4	3158				5	4	5				Protein SAAL1
LAP2A_HUMAN	P42166	75492.1	human	1742.7	1147.2	1107				3	3	3				Lamina-associated polypeptide 2, isoform alpha
FSCN1_HUMAN	Q16658	54530	human	1731.8	1138.8	1554				3	3	3				Fascin
CUL5_HUMAN	Q93034	90955.3	human	1716.4	982.3	934.7				5	4	4				Cullin-5
ODP2_HUMAN	P10515	68996.7	human	1708.8	2705.7	5726.6				3	5	5				Dihydrolipoyllysine-residue acetyltransferase component of pyruvate dehydrogenase complex, mitochondrial
DDX20_HUMAN	Q9UHI6	92240.5	human	1698.9	1893.5	758.1				6	7	6				Probable ATP-dependent RNA helicase DDX20
WDR11_HUMAN	Q9BZH6	136685	human	1698.7	1335.8	1144.8				6	6	6				WD repeat-containing protein 11
DP13A_HUMAN	Q9UKG1	79663.5	human	1678.9	1425.3	1778				5	5	5				DCC-interacting protein 13-alpha
BUB1B_HUMAN	O60566	119545	human	1669.1	1469.5	1493.7				8	8	7				Mitotic checkpoint serine/threonine-protein kinase BUB1 beta
LRC40_HUMAN	Q9H9A6	68249.9	human	1668	1054.1	1068				5	5	5				Leucine-rich repeat-containing protein 40
WDR36_HUMAN	Q8NI36	105322	human	1664	1130.3	1348.7				6	6	6				WD repeat-containing protein 36
STK3_HUMAN	Q13188	56301.1	human	1656	863.3	768.1				5	5	4				Serine/threonine-protein kinase 3
FBW1B_HUMAN	Q9UKB1	62090.9	human	1655.6	1392.5	1206.9				3	3	3				F-box/WD repeat-containing protein 11
KI21A_HUMAN	Q7Z4S6	187179	human	1654.7	1083.7	369				8	8	7				Kinesin-like protein KIF21A
COR1C_HUMAN	Q9ULV4	53249	human	1646		1373.3				3		3				Coronin-1C
HOOK1_HUMAN	Q9UJC3	84647.8	human	1640.3	1361.9	3092.6				7	7	8				Protein Hook homolog 1
PP6R2_HUMAN	O75170	104942	human	1639.8	1109.3	1974.2				6	5	6				Serine/threonine-protein phosphatase 6 regulatory subunit 2
RHG17_HUMAN	Q68EM7	95436.7	human	1623.7	1185.9	1151.5				3	4	4				Rho GTPase-activating protein 17
ARAF_HUMAN	P10398	67585.4	human	1623.3	1271.2	1491.4				6	6	6				Serine/threonine-protein kinase A-Raf
CASP8_HUMAN	Q14790	55391.1	human	1619	891.5	776				3	3	3				Caspase-8
RIR2_HUMAN	P31350	44877.7	human	1610.4	1152.5	1178.4				4	4	4				Ribonucleoside-diphosphate reductase subunit M2
RETR2_HUMAN	Q8NC44	57830.1	human	1602.5	1245.1	4544.4				3	3	4				Reticulophagy regulator 2
KAP3_HUMAN	P31323	46302.1	human	1600.5	999.8	1244				4	4	4				cAMP-dependent protein kinase type II-beta regulatory subunit
DHX16_HUMAN	O60231	119264	human	1596.5	778					3	3					Pre-mRNA-splicing factor ATP-dependent RNA helicase DHX16
endoprotease	A4D1P6	83344.4	human	1589.9	1261.6					3	3					WD repeat-containing protein 91
NAMPT_HUMAN	P43490	55521.2	human	1586.7	1096	2098.4				3	3	3				Nicotinamide phosphoribosyltransferase
VATA_HUMAN	P38606	68304.1	human	1566.2	981	1727.4				3	3	3				V-type proton ATPase catalytic subunit A
NCLN_HUMAN	Q969V3	62974.4	human	1565.3	854.4	952.6				5	5	5				Nicalin
STXB2_HUMAN	Q15833	66452.5	human	1562.8	921.2	649.9				4	4	4				Syntaxin-binding protein 2
KLC4_HUMAN	Q9NSK0	68639.5	human	1558.1	1294.8	2048.8				4	4	4				Kinesin light chain 4
FXR1_HUMAN	P51114	69720.8	human	1557.1	932.4	396.1				5	5	5				Fragile X mental retardation syndrome-related protein 1
IMA5_HUMAN	P52294	60221.8	human	1557	739.6					3	3					Importin subunit alpha-5
S23IP_HUMAN	Q9Y6Y8	111076	human	1551.8	1146.3	1812.4				4	5	5				SEC23-interacting protein
SNX4_HUMAN	O95219	51908.8	human	1541.2	798.6	1075.1				5	4	4				Sorting nexin-4
NACC1_HUMAN	Q96RE7	57258.2	human	1529.6	1121.9	1478.6				3	3	3				Nucleus accumbens-associated protein 1
KIF1A_HUMAN	Q12756	191064	human	1529.1	1161	1314.1				9	9	9				Kinesin-like protein KIF1A
RABE1_HUMAN	Q15276	99290.4	human	1523.4	1573.1	26340.1				13	16	27				Rab GTPase-binding effector protein 1
KCD12_HUMAN	Q96CX2	35700.8	human	1523.1	3540.3	4151.4				3	3	4				BTB/POZ domain-containing protein KCTD12
RABE2_HUMAN	Q9H5N1	63542.8	human	1519.3		10551.5				3		10				Rab GTPase-binding effector protein 2
GRAP1_HUMAN	Q4V328	96005.5	human	1518.4	1472.8	26931.7				12	12	25				GRIP1-associated protein 1
COG5_HUMAN	Q9UP83	92742.9	human	1516.5	1744.2	1948				4	4	4				Conserved oligomeric Golgi complex subunit 5
fiber	A5YKK6	266939	human	1504.6	1487.2	2138.9				13	14	14				CCR4-NOT transcription complex subunit 1
EXOC7_HUMAN	Q9UPT5	83381.9	human	1502.3	1358.1	1263.6				5	5	5				Exocyst complex component 7
MA1A1_HUMAN	P33908	72968.5	human	1498.1	1059.3					3	3					Mannosyl-oligosaccharide 1,2-alpha-mannosidase IA
VPS51_HUMAN	Q9UID3	86042.3	human	1463	1377.6	1630.7				4	4	4				Vacuolar protein sorting-associated protein 51 homolog
TOM70_HUMAN	O94826	67454.8	human	1460.8	931.1	1166				3	3	3				Mitochondrial import receptor subunit TOM70
SCYL1_HUMAN	Q96KG9	89631.3	human	1452.5	883.7					4	4					N-terminal kinase-like protein
LETM1_HUMAN	O95202	83354.2	human	1447.2	1083.6	1550.9				4	4	4				Mitochondrial proton/calcium exchanger protein
TBK1_HUMAN	Q9UHD2	83642.1	human	1426	1103.8	778.9				4	4	4				Serine/threonine-protein kinase TBK1
TNPO3_HUMAN	Q9Y5L0	104203	human	1418.1	1327.4	1823				5	5	6				Transportin-3
SLD5_HUMAN	Q9BRT9	26046.8	human	1416.5		4423.3				3		3				DNA replication complex GINS protein SLD5
SC31A_HUMAN	O94979	133015	human	1413.3	1031.7	1449				4	4	4				Protein transport protein Sec31A
ACSL4_HUMAN	O60488	79188	human	1405.7	1288.5	611.1				3	3	3				Long-chain-fatty-acid--CoA ligase 4
NOP2_HUMAN	P46087	89301.8	human	1396	396.2					3	3					Probable 28S rRNA (cytosine(4447)-C(5))-methyltransferase
WDR3_HUMAN	Q9UNX4	106099	human	1393.6	1193.5	991.8				3	3	3				WD repeat-containing protein 3
DCA11_HUMAN	Q8TEB1	61669.6	human	1373.5	1083.2	2205.8				3	3	3				DDB1- and CUL4-associated factor 11
LC7L2_HUMAN	Q9Y383	46513.9	human	1358.8						3						Putative RNA-binding protein Luc7-like 2
KPBB_HUMAN	Q93100	124884	human	1358.7	1418.9	1726.4				5	5	5				Phosphorylase b kinase regulatory subunit beta
FINC_HUMAN	P02751	272320	human	1351.1	1485.6	8968.6				8	13	20				Fibronectin
WAPL_HUMAN	Q7Z5K2	132946	human	1348.2	1022.6	1196.3				5	4	5				Wings apart-like protein homolog
RENT2_HUMAN	Q9HAU5	147810	human	1339.1	505.8					4	4					Regulator of nonsense transcripts 2
AP2A2_HUMAN	O94973	103960	human	1337.1	857.4	1094.6				3	3	3				AP-2 complex subunit alpha-2
ARI4B_HUMAN	Q4LE39	147809	human	1319.5	587.4					7	5					AT-rich interactive domain-containing protein 4B
PSME4_HUMAN	Q14997	211334	human	1299.8	1168.4	1418.7				9	9	9				Proteasome activator complex subunit 4
EFL1_HUMAN	Q7Z2Z2	125430	human	1298.9	798.9	681.6				6	6	6				Elongation factor-like GTPase 1
PTN9_HUMAN	P43378	68020	human	1283.7	845.6	590.8				3	3	3				Tyrosine-protein phosphatase non-receptor type 9
HDAC6_HUMAN	Q9UBN7	131419	human	1281.7	802.4	1122.7				4	4	4				Histone deacetylase 6
PLOD1_HUMAN	Q02809	83550.2	human	1274.9	814	635.7				3	3	3				Procollagen-lysine,2-oxoglutarate 5-dioxygenase 1
DDX41_HUMAN	Q9UJV9	69837.6	human	1269.7	863.4	471.7				4	4	3				Probable ATP-dependent RNA helicase DDX41
LARP1_HUMAN	Q6PKG0	123510	human	1267.1	897.8	298.4				3	3	3				La-related protein 1
C2D1A_HUMAN	Q6P1N0	104062	human	1262.2	604.3					4	3					Coiled-coil and C2 domain-containing protein 1A
ABCF3_HUMAN	Q9NUQ8	79744.7	human	1257	1532.6	1061.5				4	5	5				ATP-binding cassette sub-family F member 3
TLN1_HUMAN	Q9Y490	269767	human	1254	1033.5	1276.1				13	14	14				Talin-1
ANR52_HUMAN	Q8NB46	115077	human	1251	1102.7	878.9				3	3	3				Serine/threonine-protein phosphatase 6 regulatory ankyrin repeat subunit C
ANFY1_HUMAN	Q9P2R3	128399	human	1249.5	1011.7	1602.4				4	4	4				Rabankyrin-5
VPS53_HUMAN	Q5VIR6	94405.2	human	1241.9	899	1026.3				3	3	3				Vacuolar protein sorting-associated protein 53 homolog
RBM25_HUMAN	P49756	100185	human	1239.8	526.2					3	3					RNA-binding protein 25
GLCNE_HUMAN	Q9Y223	79274.6	human	1237.9	701.3	648.2				4	4	4				Bifunctional UDP-N-acetylglucosamine 2-epimerase/N-acetylmannosamine kinase
CD123_HUMAN	O75794	39134.8	human	1228.8	875.9					3	3					Cell division cycle protein 123 homolog
DOCK7_HUMAN	Q96N67	242561	human	1227.1	1183.1	1409.6				9	9	9				Dedicator of cytokinesis protein 7
GGYF2_HUMAN	Q6Y7W6	150070	human	1219.8	879.7	372.1				5	5	3				GRB10-interacting GYF protein 2
EXOC2_HUMAN	Q96KP1	104066	human	1214.6	1164.4	1025.4				5	5	5				Exocyst complex component 2
ANC2_HUMAN	Q9UJX6	93828.1	human	1212.1						3						Anaphase-promoting complex subunit 2
TOE1_HUMAN	Q96GM8	56547.8	human	1208.3	742.9	744.9				3	3	3				Target of EGR1 protein 1
LTBP1_HUMAN	Q14766	186796	human	1207.7	1098.2	990.3				5	5	5				Latent-transforming growth factor beta-binding protein 1
TELO2_HUMAN	Q9Y4R8	91747	human	1205.9	1315.9	1284.7				4	4	4				Telomere length regulation protein TEL2 homolog
HXK2_HUMAN	P52789	102380	human	1203.2	900					3	3					Hexokinase-2
NOL11_HUMAN	Q9H8H0	81123.6	human	1200.3						3						Nucleolar protein 11
RIC8A_HUMAN	Q9NPQ8	59709.5	human	1193.1	637.8	967.8				4	4	4				Synembryn-A
EP15R_HUMAN	Q9UBC2	94255.1	human	1164.5	930.7	14624.2				10	13	24				Epidermal growth factor receptor substrate 15-like 1
ACAD9_HUMAN	Q9H845	68760.3	human	1155.3	884.5	1152.8				4	3	3				Complex I assembly factor ACAD9, mitochondrial
GCSP_HUMAN	P23378	112730	human	1152.9	851	374				4	5	3				Glycine dehydrogenase (decarboxylating), mitochondrial
ANR17_HUMAN	O75179	274258	human	1152.7	765.2	564				7	7	7				Ankyrin repeat domain-containing protein 17
ZZEF1_HUMAN	O43149	331075	human	1152.3	1343	1596.2				14	14	14				Zinc finger ZZ-type and EF-hand domain-containing protein 1
BIRC6_HUMAN	Q9NR09	530255	human	1126.1	1712.6	1954.6				23	24	24				Baculoviral IAP repeat-containing protein 6
ELP3_HUMAN	Q9H9T3	62258.9	human	1121.3	755.5	1445.2				3	3	3				Elongator complex protein 3
TFP11_HUMAN	Q9UBB9	96819.8	human	1111.6	702.1	434.6				7	6	6				Tuftelin-interacting protein 11
BTAF1_HUMAN	O14981	206887	human	1108.9	833.3	756.3				9	9	8				TATA-binding protein-associated factor 172
CCDC6_HUMAN	Q16204	53290.9	human	1097.8	844.8	1037.6				3	3	3				Coiled-coil domain-containing protein 6
TIM_HUMAN	Q9UNS1	138658	human	1096	759.8	773.2				5	5	5				Protein timeless homolog
UTP4_HUMAN	Q969X6	76890.2	human	1068.8	602.3	294.7				3	3	3				U3 small nucleolar RNA-associated protein 4 homolog
SETB1_HUMAN	Q15047	143157	human	1062.7	428.7	205.9				4	3	4				Histone-lysine N-methyltransferase SETDB1
OSB10_HUMAN	Q9BXB5	83970.1	human	1061.7	834.5	723.2				3	3	3				Oxysterol-binding protein-related protein 10
AAAT_HUMAN	Q15758	56598.3	human	1061	2781.5	6528.7				3	5	5				Neutral amino acid transporter B(0)
HSP7E_HUMAN	Q0VDF9	54794.4	human	1058.8	739.2	583.6				3	4	3				Heat shock 70 kDa protein 14
UFL1_HUMAN	O94874	89595.3	human	1058.4	686.6	466.4				4	4	3				E3 UFM1-protein ligase 1
ZCH18_HUMAN	Q86VM9	106378	human	1029.9	356.8					3	3					Zinc finger CCCH domain-containing protein 18
SMG8_HUMAN	Q8ND04	109684	human	1014.3	776.4	640.8				5	5	5				Protein SMG8
SRRM2_HUMAN	Q9UQ35	299615	human	1010.6	1245.8	534.9				4	4	4				Serine/arginine repetitive matrix protein 2
ADNP_HUMAN	Q9H2P0	123563	human	1007.5	591.6					4	4					Activity-dependent neuroprotector homeobox protein
KS6A5_HUMAN	O75582	89865.4	human	1002.2	665.2	577.2				4	4	4				Ribosomal protein S6 kinase alpha-5
FNBP1_HUMAN	Q96RU3	71306.8	human	984.1	530.3	1501.7				3	3	3				Formin-binding protein 1
EHMT1_HUMAN	Q9H9B1	141466	human	982.9	495.9	243				4	4	3				Histone-lysine N-methyltransferase EHMT1
AMPD2_HUMAN	Q01433	100688	human	976.9	1160.8	20022.1				4	5	11				AMP deaminase 2
ODO1_HUMAN	Q02218	115935	human	974.8	1018.6	1129.3				3	3	3				2-oxoglutarate dehydrogenase, mitochondrial
ERC6L_HUMAN	Q2NKX8	141103	human	960.5	614.8	1118.8				7	7	7				DNA excision repair protein ERCC-6-like
ZC11A_HUMAN	O75152	89131.1	human	958.8	700.9	284				4	4	4				Zinc finger CCCH domain-containing protein 11A
REPS1_HUMAN	Q96D71	86662.1	human	955.6	768.1	1877.4				5	5	6				RalBP1-associated Eps domain-containing protein 1
NEB2_HUMAN	Q96SB3	89334.2	human	953.5						4						Neurabin-2
CLPX_HUMAN	O76031	69223.7	human	951.9	945.6	582.6				3	3	3				ATP-dependent Clp protease ATP-binding subunit clpX-like, mitochondrial
GIT1_HUMAN	Q9Y2X7	84341	human	941	1168.1	1472.7				3	4	4				ARF GTPase-activating protein GIT1
MACF1_HUMAN	Q9UPN3	838308	human	938.4	1147.9	2439.4				46	57	61				Microtubule-actin cross-linking factor 1, isoforms 1/2/3/5
CTNA1_HUMAN	P35221	100071	human	936.1	798	2290.2				5	5	6				Catenin alpha-1
PAPD1_HUMAN	Q9NVV4	66171.7	human	932.8						3						Poly(A) RNA polymerase, mitochondrial
GDE_HUMAN	P35573	174764	human	931.2	355.8	219.1				5	3	3				Glycogen debranching enzyme
MSH3_HUMAN	P20585	127412	human	903	573.6	447.1				4	4	4				DNA mismatch repair protein Msh3
UGGG1_HUMAN	Q9NYU2	177190	human	899.8	646.8	1512.9				7	6	8				UDP-glucose:glycoprotein glucosyltransferase 1
NEST_HUMAN	P48681	177439	human	896.5		85.9				5		3				Nestin
VPS50_HUMAN	Q96JG6	111174	human	896.4	788.9	904.5				5	5	5				Syndetin
EF2K_HUMAN	O00418	82144.1	human	876.8	598.9					5	5					Eukaryotic elongation factor 2 kinase
IPYR2_HUMAN	Q9H2U2	37920.2	human	874.5						3						Inorganic pyrophosphatase 2, mitochondrial
NFS1_HUMAN	Q9Y697	50195.7	human	869.3	595.3	417.1				3	3	3				Cysteine desulfurase, mitochondrial
TPC11_HUMAN	Q7Z392	128881	human	867.7	778.1	1104.4				3	3	3				Trafficking protein particle complex subunit 11
LIMA1_HUMAN	Q9UHB6	85225.5	human	860.9	608.1	274				4	4	3				LIM domain and actin-binding protein 1
RABX5_HUMAN	Q9UJ41	56890.8	human	855.9	544.9	6982.7				4	3	8				Rab5 GDP/GTP exchange factor
AURKA_HUMAN	O14965	45809.4	human	853.1	784.5	583.1				3	3	3				Aurora kinase A
LMNA_HUMAN	P02545	74139.5	human	852.7	676.1	577.9				3	3	3				Prelamin-A/C
L2GL1_HUMAN	Q15334	115418	human	848.1	735.1	843.8				4	4	4				Lethal(2) giant larvae protein homolog 1
MOV10_HUMAN	Q9HCE1	113671	human	847.6	576.4	573.7				4	4	3				Helicase MOV-10
WNK1_HUMAN	Q9H4A3	250794	human	845.3	1584.3	2287.2				8	9	9				Serine/threonine-protein kinase WNK1
WDR13_HUMAN	Q9H1Z4	53696	human	826.5	954.2	4577.3				3	3	4				WD repeat-containing protein 13
EIF2D_HUMAN	P41214	64706.5	human	823.1						3						Eukaryotic translation initiation factor 2D
MAEA_HUMAN	Q7L5Y9	45287.3	human	822.6	2636.1	5283.8				4	6	6				E3 ubiquitin-protein transferase MAEA
HCFC1_HUMAN	P51610	208732	human	821.2	784.1	702				4	4	4				Host cell factor 1
CUL4A_HUMAN	Q13619	87680.2	human	813.7	543	665.6				4	4	4				Cullin-4A
PARD3_HUMAN	Q8TEW0	151423	human	811.2	549.5	386				5	5	4				Partitioning defective 3 homolog
NED4L_HUMAN	Q96PU5	111932	human	802.5	589.7	1515.4				4	3	4				E3 ubiquitin-protein ligase NEDD4-like
CLGN_HUMAN	O14967	70038.6	human	801.3						3						Calmegin
PDS5A_HUMAN	Q29RF7	150830	human	798.5	611.8	607.5				6	6	6				Sister chromatid cohesion protein PDS5 homolog A
TPPC8_HUMAN	Q9Y2L5	160997	human	755.5	741.2	1052.5				6	7	7				Trafficking protein particle complex subunit 8
BIG1_HUMAN	Q9Y6D6	208767	human	753.9	793.7	1675.5				9	9	9				Brefeldin A-inhibited guanine nucleotide-exchange protein 1
RBP2_HUMAN	P49792	358199	human	742.7	378.7	215.9				10	9	9				E3 SUMO-protein ligase RanBP2
BICD2_HUMAN	Q8TD16	93533.1	human	726.7	372.6	11783.3				5	5	16				Protein bicaudal D homolog 2
TRAP1_HUMAN	Q12931	80110	human	725.3	480.5					3	3					Heat shock protein 75 kDa, mitochondrial
TRI33_HUMAN	Q9UPN9	122533	human	721.9	683.5	601				3	3	3				E3 ubiquitin-protein ligase TRIM33
SARM1_HUMAN	Q6SZW1	79388.2	human	720.4	849.3	1692.3				5	6	6				NAD(+) hydrolase SARM1
MTOR_HUMAN	P42345	288892	human	719.5	677.6	708.9				9	9	8				Serine/threonine-protein kinase mTOR
NUMA1_HUMAN	Q14980	238260	human	715.8	497	573.1				8	8	8				Nuclear mitotic apparatus protein 1
FYCO1_HUMAN	Q9BQS8	166983	human	706.8	961	1267.3				10	10	10				FYVE and coiled-coil domain-containing protein 1
MYO1B_HUMAN	O43795	131985	human	699.2	418.7	328.1				3	3	3				Unconventional myosin-Ib
COG7_HUMAN	P83436	86343.9	human	698	681.9	896.8				4	4	4				Conserved oligomeric Golgi complex subunit 7
PARG_HUMAN	Q86W56	111110	human	683.9	432.3	395.9				3	3	3				Poly(ADP-ribose) glycohydrolase
DUS3L_HUMAN	Q96G46	72593.8	human	680.9	462.9					3	3					tRNA-dihydrouridine(47) synthase [NAD(P)(+)]-like
IQGA2_HUMAN	Q13576	180578	human	673.4	457.1	396.1				7	6	6				Ras GTPase-activating-like protein IQGAP2
HEAT1_HUMAN	Q9H583	242370	human	665	543.8	663.6				7	6	7				HEAT repeat-containing protein 1
LAMA1_HUMAN	P25391	337084	human	664.3	5532.5	4891				11	37	35				Laminin subunit alpha-1
PTN12_HUMAN	Q05209	88106.4	human	663.2	562.7	441.7				3	4	4				Tyrosine-protein phosphatase non-receptor type 12
IDE_HUMAN	P14735	117968	human	662.4	445.9	558.1				3	4	3				Insulin-degrading enzyme
RADX_HUMAN	Q6NSI4	97554.2	human	659.8	515.3					3	3					RPA-related protein RADX
POGZ_HUMAN	Q7Z3K3	155344	human	656.8						3						Pogo transposable element with ZNF domain
BRAT1_HUMAN	Q6PJG6	88119.1	human	653.5	569.1	481.3				3	3	3				BRCA1-associated ATM activator 1
ZEB1_HUMAN	P37275	124074	human	645.8	294.3					5	5					Zinc finger E-box-binding homeobox 1
MON2_HUMAN	Q7Z3U7	190359	human	645.7	660.1	831.5				3	3	3				Protein MON2 homolog
LMTK2_HUMAN	Q8IWU2	164900	human	632.9	256.5	188.9				3	3	3				Serine/threonine-protein kinase LMTK2
MY18A_HUMAN	Q92614	233115	human	619.1	699.7					5	6					Unconventional myosin-XVIIIa
KRI1_HUMAN	Q8N9T8	82598.1	human	618.3	277.5					3	3					Protein KRI1 homolog
SRGP2_HUMAN	O75044	120871	human	617.2	481	865.4				4	4	4				SLIT-ROBO Rho GTPase-activating protein 2
SYLM_HUMAN	Q15031	101976	human	608.1	263.4	204.7				4	3	3				Probable leucine--tRNA ligase, mitochondrial
UBP24_HUMAN	Q9UPU5	294365	human	600.9	504.5	734.8				7	7	7				Ubiquitin carboxyl-terminal hydrolase 24
BRE1A_HUMAN	Q5VTR2	113662	human	598.9	396.2					3	3					E3 ubiquitin-protein ligase BRE1A
MICA3_HUMAN	Q7RTP6	224295	human	598.9	236.1					4	4					[F-actin]-monooxygenase MICAL3
RIF1_HUMAN	Q5UIP0	274466	human	591.9	624.4	575.2				8	10	9				Telomere-associated protein RIF1
ATX2_HUMAN	Q99700	140283	human	590.9	345.2	308.2				3	3	3				Ataxin-2
KPB1_HUMAN	P46020	137312	human	589.9	448.4	454.5				3	3	3				Phosphorylase b kinase regulatory subunit alpha, skeletal muscle isoform
ASPP2_HUMAN	Q13625	125616	human	586.5	473	375.8				3	3	3				Apoptosis-stimulating of p53 protein 2
ZFR_HUMAN	Q96KR1	117012	human	584.4	360.3	289.7				3	3	3				Zinc finger RNA-binding protein
LAMA4_HUMAN	Q16363	202524	human	574.1	592.5	766.7				5	4	6				Laminin subunit alpha-4
E2AK4_HUMAN	Q9P2K8	186911	human	563.1	522.8	469.4				8	8	6				eIF-2-alpha kinase GCN2
XPO4_HUMAN	Q9C0E2	130139	human	556.3	367.7	529.6				5	5	5				Exportin-4
EPMIP_HUMAN	Q7L775	70369.5	human	554	366.8	1153.4				3	3	3				EPM2A-interacting protein 1
NISCH_HUMAN	Q9Y2I1	166629	human	537.3	345.4	246.8				5	5	4				Nischarin
RPAP1_HUMAN	Q9BWH6	152755	human	526.6	376.6	494.6				3	3	3				RNA polymerase II-associated protein 1
SET1A_HUMAN	O15047	186034	human	519.5						3						Histone-lysine N-methyltransferase SETD1A
DNMT1_HUMAN	P26358	183165	human	515.9	357.2	325.8				4	4	4				DNA (cytosine-5)-methyltransferase 1
TB182_HUMAN	Q9C0C2	181796	human	511.8	1228.9	4087.3				9	13	16				182 kDa tankyrase-1-binding protein
2AAB_HUMAN	P30154	66213.5	human	508.1	449.4	234				3	4	3				Serine/threonine-protein phosphatase 2A 65 kDa regulatory subunit A beta isoform
ZFY16_HUMAN	Q7Z3T8	168903	human	499.4	425.1	2710.7				7	6	11				Zinc finger FYVE domain-containing protein 16
AT2B1_HUMAN	P20020	134685	human	495.9	296.8	2099.1				6	7	8				Plasma membrane calcium-transporting ATPase 1
GAK_HUMAN	O14976	143191	human	495.2	366.3	438.8				4	4	3				Cyclin-G-associated kinase
OSBL6_HUMAN	Q9BZF3	106306	human	491.3	320.3	390.8				4	4	4				Oxysterol-binding protein-related protein 6
SYVM_HUMAN	Q5ST30	118490	human	484.1						3						Valine--tRNA ligase, mitochondrial
NFKB2_HUMAN	Q00653	96749.2	human	483.4	450.1	1816.4				4	3	4				Nuclear factor NF-kappa-B p100 subunit
NOMO1_HUMAN	Q15155	134324	human	473.7	312.8	530.6				4	5	5				Nodal modulator 1
CLAP1_HUMAN	Q7Z460	169451	human	464.7	341.4	281.7				7	7	5				CLIP-associating protein 1
ASCC3_HUMAN	Q8N3C0	251460	human	463.7	303.6					5	5					Activating signal cointegrator 1 complex subunit 3
M4K4_HUMAN	O95819	142101	human	459	316.4					3	3					Mitogen-activated protein kinase kinase kinase kinase 4
DPOLA_HUMAN	P09884	165913	human	458.6	397.6	561.2				3	4	4				DNA polymerase alpha catalytic subunit
BRE1B_HUMAN	O75150	113678	human	455.5	344.3	263.2				3	3	3				E3 ubiquitin-protein ligase BRE1B
CEBPZ_HUMAN	Q03701	120974	human	455.3						3						CCAAT/enhancer-binding protein zeta
HIP1R_HUMAN	O75146	119388	human	441.7	333.8	618.7				3	3	3				Huntingtin-interacting protein 1-related protein
ARMC8_HUMAN	Q8IUR7	75509.3	human	425.1	562.1	1780.5				3	3	4				Armadillo repeat-containing protein 8
TPP2_HUMAN	P29144	138350	human	423.8		601.4				3		3				Tripeptidyl-peptidase 2
KTN1_HUMAN	Q86UP2	156275	human	417.3	311.6	340.4				4	4	4				Kinectin
VPS18_HUMAN	Q9P253	110186	human	410.7	385.1	452.3				3	3	3				Vacuolar protein sorting-associated protein 18 homolog
FBN2_HUMAN	P35556	314775	human	405.8	268.5	265.5				3	3	3				Fibrillin-2
CCD93_HUMAN	Q567U6	73197.6	human	402.3	259.8					3	3					Coiled-coil domain-containing protein 93
DICER_HUMAN	Q9UPY3	218682	human	401.3	265.5	261.1				4	4	4				Endoribonuclease Dicer
SDE2_HUMAN	Q6IQ49	49742	human	392.5	232.3					3	3					Replication stress response regulator SDE2
BPTF_HUMAN	Q12830	338262	human	382	130.5					5	5					Nucleosome-remodeling factor subunit BPTF
RELCH_HUMAN	Q9P260	134630	human	380.4	714.8	3671				4	6	8				RAB11-binding protein RELCH
PGM1_HUMAN	P36871	61449.1	human	379.1	258.6	440.9				3	3	3				Phosphoglucomutase-1
MTMR5_HUMAN	O95248	208443	human	375.5	251.1	222.1				3	3	3				Myotubularin-related protein 5
GOGB1_HUMAN	Q14789	376019	human	373.2	431.7	733				10	11	12				Golgin subfamily B member 1
ANLN_HUMAN	Q9NQW6	124199	human	352.8	269.9	143.6				3	3	3				Anillin
ATRX_HUMAN	P46100	282586	human	351.7	176.3					5	5					Transcriptional regulator ATRX
RBM15_HUMAN	Q96T37	107189	human	349.5	222.3	103.9				3	3	3				RNA-binding protein 15
NU205_HUMAN	Q92621	227922	human	345.4	284.5	316.5				4	4	4				Nuclear pore complex protein Nup205
VP13C_HUMAN	Q709C8	422390	human	332.7	325.5	390.2				6	7	8				Vacuolar protein sorting-associated protein 13C
HIP1_HUMAN	O00291	116221	human	329.8	197.7	1014.8				6	3	7				Huntingtin-interacting protein 1
MYCPP_HUMAN	Q7Z401	209244	human	326.2	214	405.3				3	4	4				C-myc promoter-binding protein
UTP6_HUMAN	Q9NYH9	70193.9	human	321	282.2	253.3				3	3	3				U3 small nucleolar RNA-associated protein 6 homolog
KIF5C_HUMAN	O60282	109495	human	315.4	290.8	564.1				3	3	4				Kinesin heavy chain isoform 5C
DHX29_HUMAN	Q7Z478	155236	human	313.7	155.8					3	3					ATP-dependent RNA helicase DHX29
KDM3B_HUMAN	Q7LBC6	191581	human	293.7						3						Lysine-specific demethylase 3B
PTN23_HUMAN	Q9H3S7	178974	human	291.3		545.7				3		3				Tyrosine-protein phosphatase non-receptor type 23
EPIPL_HUMAN	P58107	555658	human	289.7	322.6	838.8				8	9	11				Epiplakin
KNTC1_HUMAN	P50748	250749	human	280.5	365.5	353.4				4	5	5				Kinetochore-associated protein 1
ANK3_HUMAN	Q12955	480410	human	274.5	211.5	254.6				6	6	6				Ankyrin-3
UTRO_HUMAN	P46939	394466	human	267.9	298.8	356.8				7	7	7				Utrophin
CHD8_HUMAN	Q9HCK8	290519	human	266.1	273.1					3	3					Chromodomain-helicase-DNA-binding protein 8
DESP_HUMAN	P15924	331774	human	241.5	348.7	227.1	572.7	516		3	4	4	9	10		Desmoplakin
TTF2_HUMAN	Q9UNY4	129588	human	238.2	177.2	169.4				4	4	4				Transcription termination factor 2
FPRP_HUMAN	Q9P2B2	98556.5	human	236.5	463.8	3734.4				3	7	8				Prostaglandin F2 receptor negative regulator
MAP1A_HUMAN	P78559	305485	human	221.4	90.6	223.2				3	3	3				Microtubule-associated protein 1A
PDZD8_HUMAN	Q8NEN9	128563	human	202.8	264.7	803.7				3	5	5				PDZ domain-containing protein 8
TRIPC_HUMAN	Q14669	220434	human	194.4	151.4	145.9				4	4	3				E3 ubiquitin-protein ligase TRIP12
VCIP1_HUMAN	Q96JH7	134321	human	183.9	117.6					3	3					Deubiquitinating protein VCPIP1
UBP34_HUMAN	Q70CQ2	404233	human	178.4	134.3	66.2				3	3	3				Ubiquitin carboxyl-terminal hydrolase 34
ROCK1_HUMAN	Q13464	158175	human	176	167.2					3	3					Rho-associated protein kinase 1
CLIP1_HUMAN	P30622	162246	human	173.9	488.8	3176.1				4	10	14				CAP-Gly domain-containing linker protein 1
ANK2_HUMAN	Q01484	433715	human	162.8	181.9	658.2				7	7	8				Ankyrin-2
HD_HUMAN	P42858	347603	human	155.3	243.4	567				3	5	7				Huntingtin
CUX1_HUMAN	P39880	164187	human	130.4		545.3				3		5				Homeobox protein cut-like 1
AKP13_HUMAN	Q12802	307550	human	111.9	213.8	322.1				4	6	6				A-kinase anchor protein 13
MDN1_HUMAN	Q9NU22	632820	human	100	30.9					4	3					Midasin
GRDN_HUMAN	Q3V6T2	216042	human	94.6	126.6	161.9				3	3	3				Girdin
HERC1_HUMAN	Q15751	532228	human	70.8	75.7					3	3					Probable E3 ubiquitin-protein ligase HERC1
SMG1_HUMAN	Q96Q15	410501	human	70.3	83	98				5	5	5				Serine/threonine-protein kinase SMG1
RN213_HUMAN	Q63HN8	591407	human	55.8	64.8					4	4					E3 ubiquitin-protein ligase RNF213
MYCB2_HUMAN	O75592	513636	human		38	34.3					3	3				E3 ubiquitin-protein ligase MYCBP2
CBPD_HUMAN	O75976	152931	human		457.4	1692.2					4	6				Carboxypeptidase D
TFR1_HUMAN	P02786	84871.4	human		500.9	849.9					3	3				Transferrin receptor protein 1
SPTB1_HUMAN	P11277	246468	human		113.6	148.5					3	3				Spectrin beta chain, erythrocytic
PTPRG_HUMAN	P23470	162003	human		240.4	2076.9					3	5				Receptor-type tyrosine-protein phosphatase gamma
RAE2_HUMAN	P26374	74071.4	human		511.4	1453.3					3	3				Rab proteins geranylgeranyltransferase component A 2
NUP62_HUMAN	P37198	53254.9	human		2285.6						3					Nuclear pore glycoprotein p62
RAB5C_HUMAN	P51148	23482.5	human		7513.2	6716.4					3	3				Ras-related protein Rab-5C
IRAK1_HUMAN	P51617	76536.7	human		704.6	971.9					3	3				Interleukin-1 receptor-associated kinase 1
VAMP7_HUMAN	P51809	24935.1	human		1799.9	5074.8					3	4				Vesicle-associated membrane protein 7
RD23A_HUMAN	P54725	39609.2	human		2508.5	10335.6					3	3				UV excision repair protein RAD23 homolog A
GABPA_HUMAN	Q06546	51295.2	human		1448.4	6365.7					3	3				GA-binding protein alpha chain
CKAP4_HUMAN	Q07065	66022.5	human		416.9	838.9					3	3				Cytoskeleton-associated protein 4
LAMA3_HUMAN	Q16787	366649	human		38.5	109.9					3	3				Laminin subunit alpha-3
RBG1L_HUMAN	Q5R372	92512.9	human		369.5	2566.9					3	7				Rab GTPase-activating protein 1-like
NAA16_HUMAN	Q6N069	101462	human		1228.1						3					N-alpha-acetyltransferase 16, NatA auxiliary subunit
EDC4_HUMAN	Q6P2E9	151661	human		226.6	839.3					3	3				Enhancer of mRNA-decapping protein 4
SE6L2_HUMAN	Q6UXD5	97560.1	human		1536.2	3341.6					4	4				Seizure 6-like protein 2
CCD91_HUMAN	Q7Z6B0	49971.2	human		2570.2	17749.2					5	9				Coiled-coil domain-containing protein 91
PEG10_HUMAN	Q86TG7	80172.9	human		6239.6	4245.4					3	3				Retrotransposon-derived protein PEG10
EXOC6_HUMAN	Q8TAG9	93722.3	human		331.4	681.2					3	3				Exocyst complex component 6
RDH11_HUMAN	Q8TC12	35386.2	human		2015.7	2193.9					3	3				Retinol dehydrogenase 11
PASK_HUMAN	Q96RG2	142929	human		188.3	479.3					3	4				PAS domain-containing serine/threonine-protein kinase
SGMR1_HUMAN	Q99720	25127.7	human		28520.2	48848.1					3	3				Sigma non-opioid intracellular receptor 1
KTNB1_HUMAN	Q9BVA0	72333.6	human		493.1	375					3	3				Katanin p80 WD40 repeat-containing subunit B1
PDRG1_HUMAN	Q9NUG6	15511	human		7900.2	10789.6					3	3				p53 and DNA damage-regulated protein 1
INT7_HUMAN	Q9NVH2	106834	human		218.5	233.4					3	3				Integrator complex subunit 7
GID8_HUMAN	Q9NWU2	26748.6	human		2394.9	6417.4					3	4				Glucose-induced degradation protein 8 homolog
ABI2_HUMAN	Q9NYB9	55663.2	human		1607.8	2644.4					3	3				Abl interactor 2
VTI1B_HUMAN	Q9UEU0	26688.4	human		2132.9	3772.4					3	3				Vesicle transport through interaction with t-SNAREs homolog 1B
ADDG_HUMAN	Q9UEY8	79154.6	human		510.8	778					3	3				Gamma-adducin
UBP25_HUMAN	Q9UHP3	122218	human		190	971.1					3	4				Ubiquitin carboxyl-terminal hydrolase 25
DOP2_HUMAN	Q9Y3R5	258230	human		74.3	260.4					3	4				Protein dopey-2
SNX9_HUMAN	Q9Y5X1	66591.6	human		2715.9						4					Sorting nexin-9
TACC3_HUMAN	Q9Y6A5	90359.6	human		364.1	980					3	3				Transforming acidic coiled-coil-containing protein 3
RBG10_HUMAN	B7ZAP0	29037.9	human			2320.1						3				Rab GTPase-activating protein 1-like, isoform 10
SDCB1_HUMAN	O00560	32444.4	human			4970						4				Syntenin-1
EDIL3_HUMAN	O43854	53764.9	human			1963.8						4				EGF-like repeat and discoidin I-like domain-containing protein 3
STX10_HUMAN	O60499	28114.1	human			997.6						3				Syntaxin-10
ENDD1_HUMAN	O94919	55016.6	human			1590.6						3				Endonuclease domain-containing 1 protein
PLAK_HUMAN	P14923	81744.7	human			328.5						3				Junction plakoglobin
AMPH_HUMAN	P49418	76256.8	human			1662.1						3				Amphiphysin
TMF1_HUMAN	P82094	122842	human			1987.4						11				TATA element modulatory factor
NUCB1_HUMAN	Q02818	53879.3	human			2657						4				Nucleobindin-1
MFGM_HUMAN	Q08431	43104.9	human			4593.1						3				Lactadherin
SNX1_HUMAN	Q13596	59069.5	human			1372.9						4				Sorting nexin-1
TRIPB_HUMAN	Q15643	227586	human			183.8						3				Thyroid receptor-interacting protein 11
NRF1_HUMAN	Q16656	53541	human			15278.9						3				Nuclear respiratory factor 1
RTN1_HUMAN	Q16799	83617.6	human			1464.3						4				Reticulon-1
WDR44_HUMAN	Q5JSH3	101366	human			17855.9						21				WD repeat-containing protein 44
NADE_HUMAN	Q6IA69	79284.7	human			4158.7						5				Glutamine-dependent NAD(+) synthetase
HTR5A_HUMAN	Q86XA9	222004	human			179.4						3				HEAT repeat-containing protein 5A
FRAS1_HUMAN	Q86XX4	443214	human			127.3						3				Extracellular matrix protein FRAS1
GCC2_HUMAN	Q8IWJ2	195910	human			3071						17				GRIP and coiled-coil domain-containing protein 2
OXR1_HUMAN	Q8N573	97970.2	human			218.8						3				Oxidation resistance protein 1
DNJC9_HUMAN	Q8WXX5	29909.7	human			1187.4						3				DnaJ homolog subfamily C member 9
AKAP2_HUMAN	Q9Y2D5	94660.5	human			950.3						3				A-kinase anchor protein 2
NSA2_HUMAN	O95478	30065.5	human				3403.2						3			Ribosome biogenesis protein NSA2 homolog
ALBU_HUMAN	P02768	69366.7	human				2649.9	2808.9	2079				4	4	3	Albumin
CASPE_HUMAN	P31944	27679.5	human				3511	1543.4					4	3		Caspase-14
RL28_HUMAN	P46779	15747.5	human				7841						3			60S ribosomal protein L28
RL14_HUMAN	P50914	23431.8	human				23736.5	8181.7	52334.6				3	3	4	60S ribosomal protein L14
RL27_HUMAN	P61353	15797.7	human				60949.9	12391.3	81551.4				5	4	5	60S ribosomal protein L27
DSG1_HUMAN	Q02413	113748	human				6075.8	1708.9	343.6				14	11	4	Desmoglein-1
TGM3_HUMAN	Q08188	76631.8	human				687.9						3			Protein-glutamine gamma-glutamyltransferase E
DSC1_HUMAN	Q08554	99986.8	human				2638.7	790.8					4	4		Desmocollin-1
FILA2_HUMAN	Q5D862	248073	human				627.2	424					3	3		Filaggrin-2
RL7L_HUMAN	Q6DKI1	29669.2	human				3412.4	1679.1	8221.6				4	3	4	60S ribosomal protein L7-like 1
LYSC_HUMAN	P61626	16537	human					21909.8						3		Lysozyme C
RPF2_HUMAN	Q9H7B2	35582.9	human						1631.8						3	Ribosome production factor 2 homolog
YP_009724390.1	SPIKE	141178	SPIKE_SARS2	4749.4	9125.1	35907.4				17	22	23				surface glycoprotein
hexon	YP_006272963.1	106028	vector	3.47682e+07	3.26634e+07	3.82542e+07				64	63	65				prot_YP_006272963.1_15 locus_tag=YOE_gp15 db_xref=GeneID:12657118 protein=hexon protein_id=YP_006272963.1 location=18302..21130 gbkey=CDS
pVII	YP_006272959.1	21265.5	vector	1.44177e+07	1.33689e+07	1.25019e+07				12	12	12				prot_YP_006272959.1_11 locus_tag=YOE_gp11 db_xref=GeneID:12657145 protein=pVII protein_id=YP_006272959.1 location=15493..16074 gbkey=CDS
pVI	YP_006272962.1	26267.7	vector	1.27992e+07	1.19781e+07	1.05231e+07				17	17	15				prot_YP_006272962.1_14 locus_tag=YOE_gp14 db_xref=GeneID:12657117 protein=pVI protein_id=YP_006272962.1 location=17470..18201 gbkey=CDS
100kDa	YP_006272966.1	88740.9	vector	1.15862e+07	8.37512e+06	1.09601e+07				45	45	45				prot_YP_006272966.1_18 locus_tag=YOE_gp18 db_xref=GeneID:12657121 protein=100kDa protein_id=YP_006272966.1 location=23419..25827 gbkey=CDS
52-55kDa	YP_006272956.1	44840.6	vector	8.62488e+06	6.97987e+06	5.62794e+06				22	23	23				prot_YP_006272956.1_8 locus_tag=YOE_gp08 db_xref=GeneID:12657142 protein=52/55kDa protein_id=YP_006272956.1 location=10827..12017 gbkey=CDS
pV	YP_006272960.1	38899	vector	6536582	7.34114e+06	5.80008e+06				29	29	29				prot_YP_006272960.1_12 locus_tag=YOE_gp12 db_xref=GeneID:12657115 protein=pV protein_id=YP_006272960.1 location=16119..17141 gbkey=CDS
penton	YP_006272958.1	59480	vector	6.35471e+06	5.88502e+06	2.50374e+07				33	33	33				prot_YP_006272958.1_10 locus_tag=YOE_gp10 db_xref=GeneID:12657144 protein=penton protein_id=YP_006272958.1 location=13891..15489 gbkey=CDS
pIIIa	YP_006272957.1	65884.7	vector	5.81198e+06	5.22171e+06	6.09989e+06				32	32	31				prot_YP_006272957.1_9 locus_tag=YOE_gp09 db_xref=GeneID:12657143 protein=pIIIa protein_id=YP_006272957.1 location=12041..13810 gbkey=CDS
pIX	YP_006272952.1	14459.2	vector	5.39413e+06	4.53077e+06	5058112				7	7	7				prot_YP_006272952.1_4 locus_tag=YOE_gp04 db_xref=GeneID:12657138 protein=pIX protein_id=YP_006272952.1 location=3491..3919 gbkey=CDS
DNA_binding_protein	YP_006272965.1	57286.3	vector	4.72136e+06	2702904	1.82559e+06				27	27	27				prot_YP_006272965.1_17 locus_tag=YOE_gp17 db_xref=GeneID:12657120 protein=DNA binding protein protein_id=YP_006272965.1 location=complement(21852..23390) gbkey=CDS
pVIII	YP_006272969.1	24757.8	vector	2.57618e+06	2251582	2079581				6	6	6				prot_YP_006272969.1_21 locus_tag=YOE_gp21 db_xref=GeneID:12657124 protein=pVIII protein_id=YP_006272969.1 location=26455..27138 gbkey=CDS
33k	YP_006272967.1	24662	vector	2.31544e+06	1.16592e+06	330834				9	9	9				prot_YP_006272967.1_19 locus_tag=YOE_gp19 db_xref=GeneID:12657122 protein=33K protein_id=YP_006272967.1 location=join(25544..25871,26041..26372) gbkey=CDS
fiber	YP_006272973.1	47304.2	vector	1.55131e+06	1.45243e+06	5.96278e+06				24	28	28				prot_YP_006272973.1_25 locus_tag=YOE_gp25 db_xref=GeneID:12657128 protein=fiber protein_id=YP_006272973.1 location=32290..33621 gbkey=CDS
IVa2	YP_006272953.1	50365	vector	1.30597e+06	1.17543e+06	960874				19	18	19				prot_YP_006272953.1_5 locus_tag=YOE_gp05 db_xref=GeneID:12657139 protein=IVa2 protein_id=YP_006272953.1 location=complement(join(3978..5311,5590..5602)) gbkey=CDS
endoprotease	YP_006272964.1	23840.1	vector	172347	134955	168377				9	9	9				prot_YP_006272964.1_16 locus_tag=YOE_gp16 db_xref=GeneID:12657119 protein=endoprotease protein_id=YP_006272964.1 location=21146..21775 gbkey=CDS
pTP	YP_006272955.1	74389.6	vector	154813	148916	123540				26	26	26				prot_YP_006272955.1_7 locus_tag=YOE_gp07 db_xref=GeneID:12657141 protein=pTP protein_id=YP_006272955.1 location=complement(join(8461..10392,13838..13846)) gbkey=CDS
E4_ORF4	AP_000229.1	13337.1	vector	75739.6	57544.6	43739.2				3	3	3				prot_AP_000229.1_33 protein=E4 ORF4 protein_id=AP_000229.1 location=complement(33998..34342) gbkey=CDS
polymerase	YP_006272954.1	135451	vector	7533.8	5251.5	5368				10	10	10				prot_YP_006272954.1_6 locus_tag=YOE_gp06 db_xref=GeneID:12657140 protein=polymerase protein_id=YP_006272954.1 location=complement(join(5081..8662,13838..13846)) gbkey=CDS
A4ZKK7_9ADEN	A4ZKK7	13792.5	vector				1.30837e+06	180416	2.95396e+06				9	7	9	Hexon-interlacing protein
A4ZKK8_9ADEN	A4ZKK8	125452	vector				945.9		587.1				4		3	DNA polymerase
A4ZKK9_9ADEN	A4ZKK9	71142.7	vector				261637	53740.7	315474				25	23	26	Preterminal protein
A4ZKL0_9ADEN	A4ZKL0	42116.4	vector				2.13568e+07	1.79915e+06	1.55041e+07				27	23	26	Packaging protein 3
A4ZKL1_9ADEN	A4ZKL1	62138.6	vector				1.58803e+07	7.74849e+06	2.36959e+07				37	34	36	Pre-hexon-linking protein IIIa
A4ZKL2_9ADEN	A4ZKL2	58588	vector				1.19938e+07	2.40582e+07	5.56981e+07				42	44	45	Penton protein
A4ZKL3_9ADEN	A4ZKL3	21646.9	vector				5.74091e+06	309058	7.99805e+06				16	14	16	Pre-histone-like nucleoprotein
A4ZKL4_9ADEN	A4ZKL4	38058.9	vector				2.36488e+07	1.79464e+06	3.27143e+07				27	25	28	PV
A4ZKL5_9ADEN	A4ZKL5	25515.1	vector				1.81773e+07	1.98129e+07	7.33481e+07				21	22	26	Pre-protein VI
A4ZKL6_9ADEN	A4ZKL6	108314	vector				7.03456e+07	3.85517e+07	1.09661e+08				86	84	89	Hexon protein
A4ZKL7_9ADEN	A4ZKL7	23588	vector				889353	275736	1.30563e+06				14	12	13	Protease
A4ZKL8_9ADEN	A4ZKL8	54836.8	vector				15413.9	3445.6	14508.2				10	9	12	DNA-binding protein
A4ZKL9_9ADEN	A4ZKL9	82086	vector				4429.3	514.7	9347.3				9	4	8	Shutoff protein
A4ZKM0_9ADEN	A4ZKM0	24613.7	vector				10545605	5.51802e+06	1.85529e+07				10	10	11	Pre-hexon-linking protein VIII
A4ZKM1_9ADEN	A4ZKM1	40998.4	vector				6.82198e+06	1.26883e+07	3.23302e+07				31	33	33	Fiber
AP_000227.1	hAd05_E4orf6/7	17053.4	vector				291871		161633				4		4	Early 4 ORF6/7 control protein

## Sheet: color code description
color code description
iBAQ intensity - The color code for the iBAQ intensity goes from red to yellow to green, with red representing the maximum iBAQ intensity and green the minimum iBAQ intensity.
peptide count - bars indicating the amount of detected peptides (maximum bar level = 20 peptides)
membership (human or vector) - human is depicted in grey and vector is depicted in blue.
